# Supplementary material for: Torix Rickettsia are widespread in arthropods and reflect a neglected symbiosis
Source: PubMed Central journal article supplement (PMC7992394; doi:10.1093/gigascience/giab021), 2021-03-25

|                                                      |                                                                                                                                                                                                                                                                                                                                                                                                                                                                                                                                                                                                                                                                                                                                                                                                                                                                                                                                                                                                                                                                                                                                                                                                                                                                                                                                                                                                                                                                                                                                                                                                                                                                                                                                                                                                                                                                                                                                                                       |                  |
|------------------------------------------------------|-----------------------------------------------------------------------------------------------------------------------------------------------------------------------------------------------------------------------------------------------------------------------------------------------------------------------------------------------------------------------------------------------------------------------------------------------------------------------------------------------------------------------------------------------------------------------------------------------------------------------------------------------------------------------------------------------------------------------------------------------------------------------------------------------------------------------------------------------------------------------------------------------------------------------------------------------------------------------------------------------------------------------------------------------------------------------------------------------------------------------------------------------------------------------------------------------------------------------------------------------------------------------------------------------------------------------------------------------------------------------------------------------------------------------------------------------------------------------------------------------------------------------------------------------------------------------------------------------------------------------------------------------------------------------------------------------------------------------------------------------------------------------------------------------------------------------------------------------------------------------------------------------------------------------------------------------------------------------|------------------|
| <b>Manuscript Number:</b>                            | GIGA-D-20-00244                                                                                                                                                                                                                                                                                                                                                                                                                                                                                                                                                                                                                                                                                                                                                                                                                                                                                                                                                                                                                                                                                                                                                                                                                                                                                                                                                                                                                                                                                                                                                                                                                                                                                                                                                                                                                                                                                                                                                       |                  |
| <b>Full Title:</b>                                   | Torix Rickettsia are widespread in arthropods and reflect a neglected symbiosis                                                                                                                                                                                                                                                                                                                                                                                                                                                                                                                                                                                                                                                                                                                                                                                                                                                                                                                                                                                                                                                                                                                                                                                                                                                                                                                                                                                                                                                                                                                                                                                                                                                                                                                                                                                                                                                                                       |                  |
| <b>Article Type:</b>                                 | Research                                                                                                                                                                                                                                                                                                                                                                                                                                                                                                                                                                                                                                                                                                                                                                                                                                                                                                                                                                                                                                                                                                                                                                                                                                                                                                                                                                                                                                                                                                                                                                                                                                                                                                                                                                                                                                                                                                                                                              |                  |
| <b>Funding Information:</b>                          | Biotechnology and Biological Sciences Research Council (BB/M011186/1)                                                                                                                                                                                                                                                                                                                                                                                                                                                                                                                                                                                                                                                                                                                                                                                                                                                                                                                                                                                                                                                                                                                                                                                                                                                                                                                                                                                                                                                                                                                                                                                                                                                                                                                                                                                                                                                                                                 | Dr. Jack Pilgrim |
| <b>Abstract:</b>                                     | <p><b>Abstract</b></p> <p><b>Background:</b> Rickettsia are intracellular bacteria best known as the causative agents of human and animal diseases. Although these medically important Rickettsia are often transmitted via haematophagous arthropods, other Rickettsia, such as those in the Torix group, appear to reside exclusively in invertebrates and protists with no secondary vertebrate host. Importantly, little is known about the diversity or host range of Torix group Rickettsia.</p> <p><b>Results:</b> This study describes the serendipitous discovery of Rickettsia amplicons in the Barcode of Life Data System (BOLD), a sequence database specifically designed for the curation of mtDNA barcodes. Out of 184,585 barcode sequences analysed, Rickettsia is observed in approximately 0.41% of barcode submissions and is more likely to be found than Wolbachia (0.17%). The Torix group of Rickettsia are shown to account for 95% of all unintended amplifications from the genus, with a multilocus analysis of these strains revealing this symbiont commonly shifts between distantly related host taxa. A further targeted PCR screen of 1,612 individuals from 169 terrestrial and aquatic arthropod species identified mostly Torix strains and supports the “aquatic hotspot” hypothesis for Torix infection. Furthermore, the analysis of 60,409 Sequence Read Archive (SRA) deposits indicates Torix infections represent a significant proportion of all Rickettsia symbioses.</p> <p><b>Conclusions:</b> This combination of methods reveals a broad host diversity associated with Torix Rickettsia including phloem-feeding bugs, parasitoid wasps, forest detritivores and vectors of disease. The unknown host effects and transmission strategies of these endosymbionts make these newly discovered associations important to inform future directions of investigation involving the understudied Torix Rickettsia.</p> |                  |
| <b>Corresponding Author:</b>                         | Jack Pilgrim<br>University of Liverpool Institute of Infection Veterinary and Ecological Sciences<br>Neston, Cheshire, Liverpool UNITED KINGDOM                                                                                                                                                                                                                                                                                                                                                                                                                                                                                                                                                                                                                                                                                                                                                                                                                                                                                                                                                                                                                                                                                                                                                                                                                                                                                                                                                                                                                                                                                                                                                                                                                                                                                                                                                                                                                       |                  |
| <b>Corresponding Author Secondary Information:</b>   |                                                                                                                                                                                                                                                                                                                                                                                                                                                                                                                                                                                                                                                                                                                                                                                                                                                                                                                                                                                                                                                                                                                                                                                                                                                                                                                                                                                                                                                                                                                                                                                                                                                                                                                                                                                                                                                                                                                                                                       |                  |
| <b>Corresponding Author's Institution:</b>           | University of Liverpool Institute of Infection Veterinary and Ecological Sciences                                                                                                                                                                                                                                                                                                                                                                                                                                                                                                                                                                                                                                                                                                                                                                                                                                                                                                                                                                                                                                                                                                                                                                                                                                                                                                                                                                                                                                                                                                                                                                                                                                                                                                                                                                                                                                                                                     |                  |
| <b>Corresponding Author's Secondary Institution:</b> |                                                                                                                                                                                                                                                                                                                                                                                                                                                                                                                                                                                                                                                                                                                                                                                                                                                                                                                                                                                                                                                                                                                                                                                                                                                                                                                                                                                                                                                                                                                                                                                                                                                                                                                                                                                                                                                                                                                                                                       |                  |
| <b>First Author:</b>                                 | Jack Pilgrim                                                                                                                                                                                                                                                                                                                                                                                                                                                                                                                                                                                                                                                                                                                                                                                                                                                                                                                                                                                                                                                                                                                                                                                                                                                                                                                                                                                                                                                                                                                                                                                                                                                                                                                                                                                                                                                                                                                                                          |                  |
| <b>First Author Secondary Information:</b>           |                                                                                                                                                                                                                                                                                                                                                                                                                                                                                                                                                                                                                                                                                                                                                                                                                                                                                                                                                                                                                                                                                                                                                                                                                                                                                                                                                                                                                                                                                                                                                                                                                                                                                                                                                                                                                                                                                                                                                                       |                  |
| <b>Order of Authors:</b>                             | <p>Jack Pilgrim</p> <p>Panupong Thongprem</p> <p>Helen R. Davison</p> <p>Stefanos Siozios</p> <p>Matthew Baylis</p> <p>Evgeny V. Zakharov</p> <p>Sujeevan Ratnasingham</p>                                                                                                                                                                                                                                                                                                                                                                                                                                                                                                                                                                                                                                                                                                                                                                                                                                                                                                                                                                                                                                                                                                                                                                                                                                                                                                                                                                                                                                                                                                                                                                                                                                                                                                                                                                                            |                  |

|                                                                                                                                                                                                                                                                                                                                                                                                                                                                                                                                     |                     |
|-------------------------------------------------------------------------------------------------------------------------------------------------------------------------------------------------------------------------------------------------------------------------------------------------------------------------------------------------------------------------------------------------------------------------------------------------------------------------------------------------------------------------------------|---------------------|
|                                                                                                                                                                                                                                                                                                                                                                                                                                                                                                                                     | Jeremy R. deWaard   |
|                                                                                                                                                                                                                                                                                                                                                                                                                                                                                                                                     | M. Alex Smith       |
|                                                                                                                                                                                                                                                                                                                                                                                                                                                                                                                                     | Gregory D. D. Hurst |
| <b>Order of Authors Secondary Information:</b>                                                                                                                                                                                                                                                                                                                                                                                                                                                                                      |                     |
| <b>Additional Information:</b>                                                                                                                                                                                                                                                                                                                                                                                                                                                                                                      |                     |
| <b>Question</b>                                                                                                                                                                                                                                                                                                                                                                                                                                                                                                                     | <b>Response</b>     |
| Are you submitting this manuscript to a special series or article collection?                                                                                                                                                                                                                                                                                                                                                                                                                                                       | No                  |
| <p><b>Experimental design and statistics</b></p> <p>Full details of the experimental design and statistical methods used should be given in the Methods section, as detailed in our <a href="#">Minimum Standards Reporting Checklist</a>. Information essential to interpreting the data presented should be made available in the figure legends.</p> <p>Have you included all the information requested in your manuscript?</p>                                                                                                  | Yes                 |
| <p><b>Resources</b></p> <p>A description of all resources used, including antibodies, cell lines, animals and software tools, with enough information to allow them to be uniquely identified, should be included in the Methods section. Authors are strongly encouraged to cite <a href="#">Research Resource Identifiers</a> (RRIDs) for antibodies, model organisms and tools, where possible.</p> <p>Have you included the information requested as detailed in our <a href="#">Minimum Standards Reporting Checklist</a>?</p> | Yes                 |
| <p><b>Availability of data and materials</b></p> <p>All datasets and code on which the conclusions of the paper rely must be either included in your submission or deposited in <a href="#">publicly available repositories</a> (where available and ethically</p>                                                                                                                                                                                                                                                                  | Yes                 |

appropriate), referencing such data using a unique identifier in the references and in the “Availability of Data and Materials” section of your manuscript.

Have you have met the above requirement as detailed in our [Minimum Standards Reporting Checklist](#)?



## 24 **Abstract**

25 **Background:** *Rickettsia* are intracellular bacteria best known as the causative agents of human  
26 and animal diseases. Although these medically important *Rickettsia* are often transmitted via  
27 haematophagous arthropods, other *Rickettsia*, such as those in the Torix group, appear to  
28 reside exclusively in invertebrates and protists with no secondary vertebrate host.  
29 Importantly, little is known about the diversity or host range of Torix group *Rickettsia*.

30 **Results:** This study describes the serendipitous discovery of *Rickettsia* amplicons in the  
31 Barcode of Life Data System (BOLD), a sequence database specifically designed for the  
32 curation of mtDNA barcodes. Out of 184,585 barcode sequences analysed, *Rickettsia* is  
33 observed in approximately 0.41% of barcode submissions and is more likely to be found than  
34 *Wolbachia* (0.17%). The Torix group of *Rickettsia* are shown to account for 95% of all  
35 unintended amplifications from the genus, with a multilocus analysis of these strains revealing  
36 this symbiont commonly shifts between distantly related host taxa. A further targeted PCR  
37 screen of 1,612 individuals from 169 terrestrial and aquatic arthropod species identified  
38 mostly Torix strains and supports the “aquatic hotspot” hypothesis for Torix infection.  
39 Furthermore, the analysis of 60,409 Sequence Read Archive (SRA) deposits indicates Torix  
40 infections represent a significant proportion of all *Rickettsia* symbioses.

41 **Conclusions:** This combination of methods reveals a broad host diversity associated with Torix  
42 *Rickettsia* including phloem-feeding bugs, parasitoid wasps, forest detritivores and vectors of  
43 disease. The unknown host effects and transmission strategies of these endosymbionts make  
44 these newly discovered associations important to inform future directions of investigation  
45 involving the understudied Torix *Rickettsia*.

46 **Keywords:** *Rickettsia*; symbiosis; arthropods; endosymbiont; DNA barcoding

## 47 **Background**

48 It is now widely recognized that animals live in a microbial world, and that many aspects of  
49 animal biology, ecology and evolution are a product of their symbioses with microorganisms  
50 [1]. In invertebrates, these symbioses may be particularly intimate, and involve transmission  
51 of the microbe from parent to offspring [2]. The alignment of host reproduction with symbiont  
52 transmission produces a correlation between the fitness interests of the parties, reflected in  
53 symbionts evolving to play a number of physiological roles within the host, from defence [3,4]  
54 through to core anabolic and digestive functions [5,6]. However, the maternal inheritance of  
55 these microbes has led to the retention of parasitic phenotypes associated with distortion of  
56 reproduction, with symbiont phenotypes including biases towards daughter production and  
57 cytoplasmic incompatibility [7]. These diverse individual impacts alter the ecology and  
58 evolution of the host, in terms of diet, dynamics of interaction with natural enemies, sexual  
59 selection and speciation.

60

61 Heritable symbioses have evolved on multiple occasions amongst microbial taxa. In some  
62 cases, the microbial lineage is limited to a single clade of related animal hosts, such as  
63 *Buchnera* in aphids [8]. In other cases, particular heritable microbes are found across a wide  
64 range of arthropod species. *Wolbachia* represents the most common associate, considered to  
65 infect nearly half of all species [9], and this commonness is a function in part of the ability of  
66 *Wolbachia* to transfer to a broad range of new host species and spread within them (host shift  
67 events) [10]. Aside *Wolbachia*, other microbes are found commonly as heritable symbionts of  
68 arthropod hosts [11]. *Cardinium* and *Rickettsia*, for instance, have been estimated at being  
69 present in 13-55% and 20-42% of species respectively [12].

70

71 In this paper, we address the diversity and commonness of symbioses between *Rickettsia* and  
72 arthropods. The *Rickettsia* have increasingly been recognized as a genus of bacteria with  
73 diverse interactions with arthropods [13,14]. First discovered as the agents underlying several  
74 diseases of humans vectored by haematophagous arthropods [15,16], our understanding of  
75 the group changed in the 1990s with the recognition that *Rickettsia* were commonly  
76 arthropod symbionts [17,18]. *Rickettsia* were recognized first as male-killing reproductive  
77 parasites [17,19] and then later as beneficial partners [3,20,21].

78

79 Following this extension of our understanding of *Rickettsia*-arthropod interactions, a new  
80 clade of *Rickettsia* was discovered from work in *Torix* leeches [22,23]. This clade was sister to  
81 all other *Rickettsia* genera, with no evidence to date of any strain having a vertebrate  
82 pathogen phase. The host range for *Torix Rickettsia* is broader than that for other members  
83 of the genus, going beyond arthropods to include amoeba hosts [24,25]. Targeted PCR based  
84 screening have revealed *Torix* group *Rickettsia* as particularly common in three groups with  
85 aquatic association: *Culicoides* biting midges, deronectid beetles and odonates [26–28].  
86 However, some previous hypothesis-free PCR screens that aimed to detect *Rickettsia* in  
87 arthropods have likely missed these symbioses, due to divergence of the marker sequence  
88 and mismatch with the primers [29].

89

90 During our previous work on *Torix Rickettsia* in biting midges [26], we became aware of the  
91 presence of *Rickettsia CoxA* sequences deposited in GenBank that derived from studies where  
92 the intended target of amplification/sequencing was cytochrome *c* oxidase I (*COI*), the

93 mitochondrial equivalent of *CoxA*. These deposits derived from studies using mtDNA  
94 barcoding for phylogeographic inference [30], or in barcoding based species identification  
95 approaches [31,32]. Non-target amplification of *Rickettsia COI* using mitochondrial *COI*  
96 barcoding primers has been reported in spiders [31,32] and freshwater amphipods [30,33].  
97 Furthermore, we have noted two cases in our lab where amplicons obtained for mtDNA  
98 barcoding of an arthropod have, on sequence analysis, revealed *Rickettsia COI* amplification  
99 (Belli group *Rickettsia* from Collembola, and Torix group *Rickettsia* from *Cimex lectularius*  
100 bedbugs). Previous work had established barcoding approaches may amplify *COI* from  
101 *Wolbachia* symbionts [34], and the data above indicated that non-target *Rickettsia COI* may  
102 be likewise amplified during this PCR amplification for mitochondrial *COI*.

103

104 In this paper, we use three approaches to reveal the diversity and commonness of Torix  
105 *Rickettsia* in arthropods. First, we probed the contaminant bin of the Barcode of Life Data  
106 System (BOLD [35]) for *Rickettsia* sequences and used the template from these projects to  
107 define the diversity of *Rickettsia* observed using a multilocus approach. Second, we screened  
108 DNA templates from multiple individuals from 169 arthropod species for *Rickettsia* presence  
109 using PCR assays that function more broadly than previously utilized in screens. Finally, we  
110 used bioinformatic approaches to examine the Sequence Read Archive (SRA) depositions for  
111 one individual from 1,341 arthropod species for the presence of *Rickettsia* and used this as a  
112 means of estimating the relative balance of Torix group to other *Rickettsia* within symbioses.

113

## 114 **Data Description**

115 *Barcode of Life Data System (BOLD)*



116 While searching the Barcode of Life Data System (BOLD), a depository of >8 million *COI* mtDNA  
117 sequences, hundreds of hits were observed with high sequence similarity to Torix group  
118 *Rickettsia*. To investigate the diversity and host distribution of these non-target amplicons,  
119 access was permitted to analyse *COI* barcoding data deriving from a BOLD screening project  
120 totaling 184,585 arthropod specimens from 21 countries and collected between 2010 and  
121 2014. *COI* sequences provided by BOLD were generally derived from templates created from  
122 somatic tissues (legs are often used in order to retain most of the specimen for further  
123 analyses if necessary), but also rarely included abdominal tissues. The first dataset made  
124 available [36] included 3,817 sequences deemed as contaminant sequences as a result of not  
125 matching initial morphotaxa assignment. The second dataset included 55,366 specimens  
126 judged to not contain non-target amplicons [37]. A remaining 125,402 specimens were not  
127 made available, and the 55,366 subsample was used as a representative sample from which  
128 the contaminants had originated (Figure 1). The protocols for data collection, data curation  
129 and quality control of submitted BOLD samples is described by Ratnasingham & Hebert [38].

130

### 131 *Sequence Read Archive (SRA)*

132 Further insights into the balance of *Rickettsia* groups within arthropod symbioses were  
133 obtained through searching for *Rickettsia* presence in Illumina datasets associated with  
134 arthropod whole genome sequence (WGS) projects in the SRA (60,409 records as of the 20th  
135 May 2019). To reduce the bias from over-represented laboratory model species (e.g.  
136 *Drosophila* spp., *Anopheles* spp.) a single dataset per species was examined, and where  
137 multiple data sets existed for a species, that with the largest read count was retained. The

138 resultant dataset [39], representing 1,341 arthropod species, was then screened with  
139 phyloFlash [40] which finds, extracts and identifies 16S rRNA sequences.

140

#### 141 *Targeted screen of aquatic and terrestrial arthropods*

142 A targeted PCR *Rickettsia* screen of 1,612 individuals from 169 species (Table 1) was  
143 undertaken as an adjunct to the BOLD and SRA searches to increase our understanding of  
144 *Rickettsia* ecology. Within this, we included a range of both aquatic and terrestrial taxa, to  
145 investigate if the previous work highlighting particular aquatic taxa as hotspots for *Rickettsia*  
146 symbiosis (water beetles, biting midges, damselflies) reflects a wider higher incidence in  
147 species from this habitat.

148

## 149 **Analyses**

### 150 *Torix Rickettsia is the most common bacterial contaminant produced during barcoding* 151 *projects*

152 Out of 3,817 sequences considered contaminants, 1,126 of these were deemed by BOLD to  
153 be bacterial in origin (Figure 1, [36]). Phylogenetic placement supported the correct  
154 designation of these sequences as of microbial origin (Figure 2). The dominant genus was  
155 *Rickettsia* with 753 (66.9%) amplifications, compared to *Wolbachia* with 306 (27.2%). Of the  
156 remaining 67 non-target sequences, 16 formed a monophyletic group with other  
157 Anaplasmataceae and 51 were undesignated proteobacteria. When considering the 184,585  
158 specimens in the total project, this analysis gave an overall *Rickettsia* and *Wolbachia*  
159 prevalence of 0.41% and 0.17% respectively within the dataset. Through later access to the  
160 55,366 representative data subset from where the contaminants originated, further unique

161 bacteria contaminants were also detected (possibly missed by BOLD's automated  
162 contaminant filtering system). This suggests these prevalences are conservative estimates.

163

164 BOLD *Rickettsia* contaminants were dominated by amplicons from the Torix group of  
165 *Rickettsia* (716/753; 95.1%) (Figure 3). The remaining 37 *Rickettsia* clustered with  
166 Transitional/Spotted Fever (n=15), Belli (n=9), Rhyzobius (n=1) groups, while 12 sequences  
167 formed two unique clades. Across arthropod hosts: 292 (38.8%) were derived from  
168 Hymenoptera; 189 (25.1%) from Diptera; 177 from Hemiptera (23.5%); 41 from Psocoptera  
169 (5.4%); 40 from Coleoptera (5.3%); 7 from Arachnida (0.9%); 4 from Trichoptera (0.5%); and  
170 single cases of Thysanoptera, Diplopoda and Dermaptera (0.1% each). Mapping the 753  
171 *Rickettsia* to collection site (Additional file 1) revealed arthropod infections predominantly  
172 from Canada with other locations in South/Central America, Europe, Africa and Asia.

173

174 We observed that two sets of *COI* primers were responsible for 99% of *Rickettsia*  
175 amplifications (Additional file 2) with a majority (89%) amplifying with the primer combination  
176 C\_LepFolF/C\_LepFolR [41]. Torix *Rickettsia* *COI* showed a stronger match to these primers at  
177 the 3' end (the site responsible for efficient primer annealing) compared to *Wolbachia* and  
178 other *Rickettsia* groups. Whilst all contained a SNP at the 3' priming end of C\_LepFolR, Torix  
179 *Rickettsia* (*Rickettsia* endosymbiont of *Culicoides newsteadii*; MWZE00000000) was the only  
180 sequence to not contain a similar SNP at the 3' priming site of C\_LepFolF (Additional file 3).

181

182 *Rickettsia multilocus phylogenetic analysis*

183

184 To better resolve the phylogenetic relationships between BOLD *Rickettsia* contaminants, a  
185 multilocus approach was employed on a subsample of 186 *Rickettsia*-containing samples. To  
186 this end, 2 further housekeeping genes (*16S rRNA*, *gltA*) and the antigenic *17KDa* protein gene  
187 were amplified from the respective templates.

188

189 Overall, 135 extracts successfully amplified and gave a high-quality sequence for at least one  
190 gene. No intragenic or intergenic recombination was detected for any of the gene profiles. A  
191 phylogram, including 99 multilocus profiles containing at least 3 of the 4 *Rickettsia* genes of  
192 interest (including *COI*), allocated strains to both Limoniae and Leech subclades of the Torix  
193 group (Figure 4) and these subclades were derived from similar hosts. For example, specific  
194 families (Hemiptera: Psyllidae and Hymenoptera: Diapriidae) were present in both Leech and  
195 Limoniae groups. A full list of multilocus profiles and *Rickettsia* group designation can be found  
196 in Additional file 4.

197

198 The multilocus study also provided evidence of co-infection with *Rickettsia*. During Sanger  
199 chromatogram analysis, double peaks were occasionally found at third codon sites from  
200 protein coding genes. This pattern was observed in 6/10 *Philotarsus californicus* individuals  
201 and in one member of each of the Psilidae, Sciaridae, Chironomidae and Diapriidae (Additional  
202 file 4). Where double peaks were observed, this was found consistently across markers within  
203 an individual specimen. This pattern indicates co-infecting *Rickettsia* strains in hosts is a  
204 widespread phenomenon of the Torix group.

205

206 *Barcoding success of host taxa*

207 An available subset of attempted barcodes associated with the contaminants contained  
208 55,366 out of 184,585 arthropods originally used in the overall study [37]. The three classes  
209 of Insecta (n=49,688), Arachnida (n=3,626) and Collembola (n=1,957), accounted for >99.8%  
210 of total specimens (Figure 1). Successful amplification and sequencing of *COI* was achieved in  
211 43,246 specimens (78.1%) of the genomic extracts, but when assessed at the order level  
212 success rates varied (Additional file 5). The likely explanation for this variation is taxa-specific  
213 divergence of sequences at priming sites.

214

215 The number of each taxonomic order giving at least one *Rickettsia* amplification was then  
216 calculated and adjusted based on the total number of specimens in the project to allow for a  
217 prevalence estimate. Overall, Hymenoptera, Diptera and Hemiptera were the three taxa most  
218 likely to be associated with *Rickettsia COI* amplification (87.4%). Similarly, on assessment of a  
219 subsample from the project where the contaminants originated, a majority (77.7%) of the  
220 dataset were also accounted for by these three orders. After adjusting the prevalence to take  
221 into account the number of inaccessible specimens, Trichoptera (2.45%), Dermaptera (1.89%)  
222 and Psocodea (1.67%) were the most likely taxa to give an inadvertent *Rickettsia* amplification.  
223 Despite Hemiptera and Diptera having a similar estimated prevalence (0.58% and 0.56%),  
224 Hemiptera were much more likely to fail to barcode (67.2% vs 93.3%) indicating the true  
225 dipteran prevalence is likely to be higher, as a barcoding failure is necessary to amplify non-  
226 target bacteria *COI*. Attempts to re-barcode 186 *Rickettsia*-containing DNA templates of  
227 interest from BOLD resulted in 90 successful arthropod host barcodes (Additional file 4).

228

229 *Rickettsia* bacterial diversity detected by Targeted and SRA searches

230 The targeted *Rickettsia* screen of 1,612 individuals from 169 invertebrate species detected  
231 infections in 16 species (9.47%) including both aquatic and terrestrial taxa (Table 1). Of these,  
232 14 profiles clustered within the Torix group with the remaining two placed in the Belli and  
233 Rhyzobius groups (Figure 5). Comparisons of Torix *Rickettsia* frequency between  
234 aquatic/semiaquatic vs terrestrial arthropods revealed evidence for a higher representation  
235 of Torix *Rickettsia* infected species in the aquatic biome (Fisher's Exact,  $P = 0.019$ ).

236

237 [Insert Table 1 here]

238

239 During the SRA search, phyloFlash flagged 29 *Rickettsia* sequences in the groups: Belli (n=12),  
240 Torix (n=8), Transitional (n=6), Rhyzobius (n=2), and Spotted Fever (n=1) (Figure 5). In addition,  
241 Kraken identified nine *Rickettsia*-containing arthropod SRA datasets missed by phyloFlash.  
242 Two of these were from the Torix group, in phantom midge hosts (Diptera: Chaoboridae:  
243 *Mochlonyx cinctipes* and *Chaoborus trivitattus*), with the remaining seven placed in Belli and  
244 Spotted Fever groups [39]. The search of GenBank revealed 11 deposits ascribed to host  
245 mtDNA that were in fact Torix *Rickettsia* sequences (Additional files 6 and 7).

246

#### 247 *The hidden host diversity of Torix Rickettsia*

248 Overall, novel Torix hosts detected from all screening methods included taxa from the orders  
249 Dermaptera, Gastropoda, Trichoptera and Trombidiformes. Additionally, new Torix-  
250 associated families, genera and species were identified. These included haematophagous flies  
251 (*Simulim aureum*; *Anopheles plumbeus*; *Protocalliphora azurea*; Tabanidae), several parasitoid  
252 wasp families (e.g. Ceraphronidae; Diapriidae; Mymaridae), forest detritivores (e.g. Sciaridae;

253 Mycetophilidae; Staphylinidae) and phloem-feeding bugs (Psyllidae; Ricaniidae). Feeding  
254 habits such as phloem-feeding, predation, detritivory or haematophagy were not correlated  
255 with any particular Torix *Rickettsia* subclade (Figure 6). Furthermore, parasitoid and aquatic  
256 lifestyles were seen across the phylogeny. All newly discovered Torix *Rickettsia* host taxa are  
257 described in Table 2, alongside previously discovered hosts in order to give an up to date  
258 overview of Torix-associated taxa.

259

260 [Insert Table 2 here]

261

## 262 **Discussion**

263 Symbiotic interactions between hosts and microbes are important drivers of host phenotype,  
264 with symbionts both contributing to, and degrading, host performance. Heritable microbes  
265 are particularly important contributors to arthropod biology, with marked attention focused  
266 on *Wolbachia*, the most common associate [9]. Members of the Rickettsiales, like *Wolbachia*,  
267 share an evolutionary history with mitochondria [42], such that a previous screen of BOLD  
268 submissions of mtDNA submissions observed *Wolbachia* as the main bacterial contaminant  
269 associated with DNA barcoding [34]. However, our BOLD screen found that *Rickettsia* were  
270 more likely to be amplified than *Wolbachia* (0.41% vs 0.17% of deposits). Furthermore, Torix  
271 group *Rickettsia* were overrepresented in barcode misamplifications (95%) when compared  
272 to other groups within the genus. A comparison of the most commonly used barcoding  
273 primers to *Wolbachia* and *Rickettsia* genomes suggest homology of the forward primer 3' end  
274 was likely responsible for this bias towards Torix *Rickettsia* amplification. To gain a clearer  
275 understanding of the relative balance of Torix group to other *Rickettsia* within symbioses and

276 habitats, a targeted screen and bioinformatic approach was also undertaken. Through these  
277 three screens, a broad range of host diversity associated with Torix *Rickettsia* was uncovered.

278

279 As the *in silico* and empirical evidence suggests *Rickettsia COI* amplification is not uncommon  
280 [31–33], why has this phenomenon not been described more widely before? The conduction  
281 of a previous large-scale non-target *COI* study using BOLD submissions [34], revealed only  
282 *Wolbachia* hits. This screen involved comparison to a *Wolbachia*-specific reference library and  
283 was thus likely to miss *Rickettsia*. Additionally, there has been a lack of Torix *Rickettsia COI*  
284 homologues to compare barcodes to until recently, where a multilocus identification system,  
285 including *COI* was devised [26]. Indeed, out of the contaminant dataset received in this study,  
286 some of the *Rickettsia* contaminants were tentatively described by BOLD as *Wolbachia* due to  
287 the previous absence of publicly available *Rickettsia COI* to compare.

288

289 Although *Rickettsia* will only interfere with barcoding in a minority of cases (~0.4%), it is likely  
290 that alternate screening primers for some studies will need to be considered. In a  
291 demonstration of how unintended *Rickettsia* amplifications can affect phylogeographic  
292 studies relying on DNA barcoding, a *Rickettsia COI* was conflated with the mtDNA *COI* of a  
293 species of freshwater amphipod, *Paracalliope fluvialis* [30]. Subsequently, supposed unique  
294 mtDNA haplotypes were allocated to a particular collection site, whereas this merely  
295 demonstrated the presence of Torix *Rickettsia* in host individuals in this lake. Contrastingly,  
296 non-target *Rickettsia* amplification can also allow for the elucidation of a novel host range of  
297 the symbiont [31–33] and this has been exemplified with our probing of BOLD.

298



299 Previously, several host orders have been associated with Torix *Rickettsia*, including Araneae,  
300 Coleoptera, Diptera, Hemiptera and Odonata [27,28,43–45]. However, newly uncovered host  
301 orders from this study include Dermaptera (earwigs), Gastropoda (snails), Trichoptera (caddis  
302 flies) and Trombidiformes (mites) (Table 2). Caution needs to be taken when interpreting what  
303 these newly found associations mean, as mere presence of *Rickettsia* DNA does not  
304 definitively indicate an endosymbiotic association. Indeed, parasitism or ingestion of  
305 symbiont-infected biota can also result in PCR detection [46–48]. Additionally, by calculating  
306 barcode success rate at an order level, Hemiptera were deemed to fail barcoding (either lack  
307 of amplification and/or quality sequence) more commonly than Diptera despite having a  
308 similar estimated *Rickettsia* prevalence (Additional file 5). As an increased barcoding failure  
309 rate is correlated with non-target *COI* amplification, it is probable there is a higher overall  
310 proportion of Torix *Rickettsia*-associated Diptera than Hemiptera in BOLD and likely in nature.  
311

312 Model-based estimation techniques suggest *Rickettsia* are present in between 20-42% of  
313 arthropod species [12]. However, targeted screens often underestimate the incidence of  
314 *Rickettsia* hosts due to various methodological biases including small within-species sample  
315 sizes (missing low-prevalence infections) and the use of non-conserved primers [29].  
316 Importantly, the inclusion and exclusion of specific ecological niches can also lead to a skewed  
317 view of *Rickettsia* symbioses. A previous review of *Rickettsia* bacterial and host diversity by  
318 Weinert et al. [13] suggested a possible (true) bias towards aquatic taxa in the Torix group. In  
319 accordance with this, our targeted screen demonstrated Torix *Rickettsia* infections were more  
320 prevalent in aquatic arthropod species compared to terrestrial. However, our observed over-  
321 representation of Torix group *Rickettsia* (14/16 strains) contrasts with Weinert’s findings

322 which show a predominance of Belli infections and is likely due to the latter study's absence  
323 of screened aquatic taxa. Furthermore, through the additional use of a bioinformatics  
324 approach, our SRA search appears to confirm that Belli and Torix are two of the most common  
325 *Rickettsia* groups among arthropods. Overall, these multiple screening methods suggest Torix  
326 *Rickettsia* are more widespread than previously thought and their biological significance  
327 underestimated.

328

329 Previous studies have used either one or two markers to identify the relatedness of strains  
330 found in distinct hosts. In this study, we use the multilocus approach developed in Pilgrim et  
331 al. [26] to understand the affiliation of Torix *Rickettsia* from diverse invertebrate hosts. Our  
332 analysis of Torix strains indicates that closely related strains are found in distantly related taxa.  
333 Closely related *Rickettsia* are also found in hosts from different niches and habitats – for  
334 instance, the *Rickettsia* strains found in terrestrial blood feeders do not lie in a single clade,  
335 but rather are allied to strains found in non-blood feeding host species. Likewise, strains in  
336 phloem feeding insects are diverse rather than commonly shared.

337

338 The distribution of Torix *Rickettsia* across a broad host range suggests host shifts are occurring  
339 between distantly related taxa. It is notable that parasitoid wasps are commonly infected with  
340 *Rickettsia* and have been associated with enabling symbiont host shifts [49,50]. Aside from  
341 endoparasitoids, it is also possible that plant-feeding can allow for endosymbiont horizontal  
342 transmission [51,52]. For example, *Rickettsia* horizontal transmission has been demonstrated  
343 in *Bemisia* whiteflies infected by phloem-feeding [51,53]. Finally, ectoparasites like the Torix-  
344 infected water mites of the Calyptostomatidae family, could also play a role in establishing

345 novel *Rickettsia*-host associations, as feeding by mites has been observed to lead to host shifts  
346 for other endosymbiont taxa [54]. Indeed, if multiple horizontal transmission paths do exist,  
347 this could account for the diverse plethora of infected taxa, as well as arthropods identified in  
348 this study which harbour more than one strain of symbiont [55].

349

350 The finding that *Torix Rickettsia* are associated with a broad range of invertebrates leads to  
351 an obvious question: what is the impact and importance of these symbiotic associations?  
352 Previous work has established *Torix Rickettsia* represent heritable symbionts and it is likely  
353 that this is true generally. There have, however, been few studies on their impact on the host.  
354 In the earliest studies [22,23], *Torix* spp. leeches infected with *Rickettsia* were observed to be  
355 substantially larger than their uninfected counterparts. Since then, the only observation of  
356 note, pertaining to the *Torix* group, is the reduced ballooning (dispersal) behaviour observed  
357 in infected *Erigone atra* money spiders [56]. Overall, the incongruencies in host and *Torix*  
358 *Rickettsia* phylogenies (suggesting a lack of co-speciation and obligate mutualism), along with  
359 the lack of observed sex bias in carrying the symbiont, indicate facultative benefits are the  
360 most likely symbiotic relationship [29]. However, *Rickettsia* induction of thelytokous  
361 parthenogenesis should not be discounted in *Torix* infected parasitoid wasps identified in this  
362 study [57,58]. To add to the challenge of understanding *Torix Rickettsia* symbioses, the  
363 challenges of laboratory rearing of many *Torix Rickettsia* hosts has led to difficulties in  
364 identifying model systems to work with. However, the large expansion of our *Torix* group host  
365 knowledge can now allow for a focus on cultivatable hosts (e.g phloem-feeding bugs).

366

367 To conclude, we have shown that large-scale DNA barcoding initiatives of arthropods can  
368 include non-target amplification of *Torix Rickettsia*. By examining these non-target sequences,  
369 alongside a targeted screen and SRA search, we have uncovered numerous previously  
370 undetected host associations. Our findings lay bare multiple new avenues of inquiry for *Torix*  
371 *Rickettsia* symbioses.

372

### 373 **Potential Implications**

374 A particularly important group for future study of *Torix Rickettsia* interactions are  
375 haematophagous host species. Our discovery of *Rickettsia*-associated tabanid and simuliid  
376 flies, alongside *Anopheles plumbeus* mosquitoes, add to existing blood-feeders previously  
377 identified as *Torix* group hosts which include sand flies [59,60], fleas [61], ticks [62,63] bed  
378 bugs [64] and biting midges [26]. Some *Rickettsia* strains are known to be transmitted to  
379 vertebrates via haematophagy [65]. However, there is no evidence to date for vertebrate  
380 pathogenic potential for the *Torix* group. Despite this, *Torix Rickettsia* could still play a  
381 significant role in the ecology of vectors of disease. A key avenue of research is whether these  
382 endosymbionts alter vectorial capacity, as found for other associations [66]. In contrast to the  
383 widely reported virus blocking phenotype observed in *Wolbachia*-infected vectors [67,68],  
384 *Rickettsia* have been associated with a virus potentiating effect in *Bemisia* white flies vectoring  
385 Tomato yellow leaf curl virus [69]. Additionally, we uncovered a *Rickettsia*-infected psyllid  
386 (*Cacopsylla melanoneura*) which is a vector of *Phytoplasma mali* (apple proliferation) [70].  
387 Thus, the question of *Torix Rickettsia* vector-competence effects is clearly of widespread  
388 relevance and deserves further attention.

389

## 390 **Methods**

### 391 **a) Interrogation of the Barcode of Life Data System (BOLD)**

#### 392 *Assessment of non-target microbe amplicons*

393 The designation of bacterial contaminants from a BOLD contaminant dataset containing 3,817  
394 sequences [36] was refined by phylogenetic placement. To this end, barcodes confirmed as  
395 microbial sequences were aligned using the “L-INS-I” algorithm in MAFFT v7.4 [71] before  
396 using Gblocks [72] to exclude areas of the alignment with excessive gaps or poor alignment.  
397 ModelFinder [73] then determined the TIM3+F+I+G4 model to be used after selection based  
398 on default “auto” parameters using the Bayesian information criteria. A maximum likelihood  
399 (ML) phylogeny was then estimated with IQTree [74] using an alignment of 561 nucleotides  
400 and 1000 ultrafast bootstraps [75]. The Rickettsiales genera *Anaplasma*, *Neorickettsia*,  
401 *Rickettsia* and *Wolbachia* (Supergroups A, B, E, F, H) were included in the analysis as  
402 references. Finally, phylogenetic trees were drawn and annotated based on host taxa (order)  
403 using the EvolView [76] online tree annotation and visualisation tools.

404

405 A determining factor for non-target amplification of bacteria is primer site matching to  
406 microbial associates. Subsequently, pairwise homology of the primer set predominantly used  
407 for BOLD barcode screening was compared to *Rickettsia* and *Wolbachia COI* genes.

408

#### 409 *Further phylogenetic analysis*

410 *COI* sequence alone provides an impression of the frequency with which *Rickettsia* associates  
411 are found in barcoding studies. However, they have limited value in describing the diversity of  
412 the *Rickettsia* found. To provide further insight into the diversity of *Rickettsia* using a

413 multilocus approach, we obtained 186 DNA extracts from the archive at the Centre for  
414 Biodiversity Genomics (University of Guelph, Canada) that had provided *Rickettsia* amplicons  
415 in the previous screen. Templates were chosen based on varied collection site, host order and  
416 phylogenetic placement. Multilocus PCR screening and phylogenetic analysis of *Rickettsia* was  
417 then completed, using the methodology in Pilgrim et al. [26]. However, slight variations  
418 include the exclusion of the *atpA* gene due to observed recombination at this locus.  
419 Furthermore, the amplification conditions for the *17KDa* locus was changed because a Torix  
420 *Rickettsia* reference DNA extract (Host: *Simulium aureum*) failed to amplify with the primer  
421 set Ri\_17KD\_F/ Ri\_17KD\_R from Pilgrim et al. [26]. Subsequently, a *17KDa* alignment from  
422 genomes spanning the Spotted fever, Typhus, Transitional, Belli, Limoniae groups, and the  
423 genus *Megaira* was generated to design a new set of primers using the online tool PriFi [77].  
424  
425 Once multilocus profiles of the *Rickettsia* had been established, we tested for recombination  
426 within and between loci using RDP v4 [78] using the MaxChi, RDP, Chimaera, Bootscan and  
427 GENECONV algorithms with the following criteria to assess a true recombination positive: a p-  
428 value of <0.001; sequences were considered linear with 1000 permutations being performed.  
429 Samples amplifying at least 3 out of 4 genes (*16S rRNA*, *17KDa*, *COI* and *gltA*) were then  
430 concatenated and their relatedness estimated using maximum likelihood as previously  
431 described. The selected models used in the concatenated partition scheme [79] were as  
432 follows: *16S rRNA*: TIM3+F+R2; *17KDa*: GTR+F+I+G4; *COI*:TVM+F+I+G4; *gltA*: TVM+F+I+G4.  
433 Accession numbers for all sequences used in phylogenetic analyses can be found in Additional  
434 file 8.

435

436 *Re-barcoding Rickettsia-containing BOLD DNA extracts*

437 Aside from phylogenetic placement of these *Rickettsia*-containing samples, attempts were  
438 made to extract an mtDNA barcode from these taxa in order to identify the hosts of infected  
439 specimens. Previous non-target amplification of *Rickettsia* through DNA barcoding of  
440 arthropod DNA extracts had occurred in the bed bug *Cimex lectularius*, with a recovery of the  
441 true barcode after using the primer set C1-J-1718/HCO1490, which amplifies a shortened  
442 bp sequence within the *COI* locus. Subsequently, all samples were screened using these  
443 primers or a further set of secondary *COI* primers (LCOt\_1490/ MLepR1 and  
444 LepF1/C\_ANTMR1D) if the first failed to give an adequate host barcode. All *COI* and *Rickettsia*  
445 multilocus screening primer details, including references, are available in Additional file 9.

446

447 Cycling conditions for *COI* PCRs were as follows: initial denaturation at 95°C for 5 min, followed  
448 by 35 cycles of denaturation (94°C, 30 sec), annealing (50°C, 60 sec), extension (72°C, 90 sec),  
449 and a final extension at 72°C for 7 min. *Rickettsia* and host amplicons identified by gel  
450 electrophoresis were subsequently purified enzymatically (ExoSAP) and Sanger sequenced  
451 through both strands using a BigDye® Terminator v3.1 kit (Thermo Scientific, Waltham, USA),  
452 and capillary sequenced on a 3500 xL Genetic Analyser (Applied Biosystems, Austin, USA).  
453 Forward and reverse reads were assessed in UGENE [80] to create a consensus sequence by  
454 eye with a cut-off phred (Q) score [81] of 20. Primer regions were trimmed from barcodes  
455 before being matched to the GenBank database by BLAST based on default parameters and  
456 an e-value threshold of <1e-85. Host taxonomy was determined by a barcode-based  
457 assignment of the closest BLAST hit, under the following criteria modified from Ramage et al.  
458 [48]:

459 1) Species level designation for at least 98% sequence identity.

460 2) Genus level designation for at least 95% sequence identity.

461 3) Family level designation for at least 85% sequence identity.

462 Additionally, all sequences were required to be at least >200 bp in length.

463

464 *Assessment of barcoding success*

465 One of the factors determining a successful *COI* bacterial amplification is the initial failure of

466 an extract to amplify mtDNA. Subsequently, to determine the likelihood of this event within

467 taxa, we used the 55,366 specimen representative data subset [37] to evaluate failure rates.

468 To this end, all orders of host which gave at least one non-target *Rickettsia COI* hit were

469 assessed. The barcoding success rate was determined as the proportion of specimens which

470 matched initial morphotaxa assignment and were not removed after BOLD quality control

471 [38]. As the total *Rickettsia* count was from a larger dataset than the one made available, an

472 adjusted prevalence for each taxon was calculated based on the representative data subset.

473

#### 474 **b) Targeted and bioinformatic *Rickettsia* screens**

475 *Targeted screen of aquatic and terrestrial arthropods*

476 Overall, 1,612 individuals from 169 species, including both terrestrial (DNA templates derived

477 from European material, mostly from Duron et al. [11]) and aquatic invertebrates (largely

478 acquired from the UK between 2016-2018), were screened. mtDNA *COI* amplification was

479 conducted as a control for DNA quality. To investigate symbiont infection status, rickettsial-

480 specific primers based on *gltA* and *16S rRNA* genes were used for conventional PCR screening

481 [26], with Sanger sequences obtained from at least one specimen per *Rickettsia* positive



482 species to identify any misamplification false positives. Subsequently, the number of species  
483 containing at least one *Torix Rickettsia* positive individual were compared between terrestrial  
484 and aquatic environments using the Fisher's Exact test. Additionally, newly identified hosts of  
485 interest from BOLD and targeted screens were also placed phylogenetically (see sections  
486 above) before being mapped by lifestyle and diet.

487

#### 488 *Search of the Sequence Read Archive (SRA) and GenBank*

489 The SRA dataset [39] containing one individual from 1,341 arthropod species was screened  
490 with phyloFlash [40] which finds, extracts and identifies *16S rRNA* sequences. Reconstructed  
491 full *16S rRNA* sequences affiliated to *Rickettsia* were extracted and compared to sequences  
492 derived from the targeted screen phylogenetically (see sections above) to assess group  
493 representation within the genus. The microbial composition of all SRA datasets that did not  
494 result in a reconstructed *Rickettsia 16S rRNA* with phyloFlash were re-evaluated using Kraken2  
495 [82], a k-mer based taxonomic classifier for short DNA sequences. A cut-off of at least 40k  
496 reads assigned to *Rickettsia* taxa was applied for reporting potential infections (theoretical  
497 genome coverage of  $\sim 1 - 4X$  assuming an average genome size of  $\sim 1.5\text{Mb}$ ).

498

499 We also examined GenBank for *Rickettsia* sequences deposited as invertebrate *COI* barcodes.  
500 To this end, a BLAST search of *Torix Rickettsia COI* sequences from previous studies [26,32]  
501 was conducted on the 29<sup>th</sup> June 2020. Sequences were initially considered belonging to the  
502 *Torix* group if their similarity was  $>90\%$  and subsequently confirmed phylogenetically as  
503 described above.

504

505 **Table 1.1.** Targeted *Rickettsia* screen of aquatic/semiaquatic invertebrates.

506

| Aquatic/Semiaquatic invertebrate group | Species                                              | Location                              | Year        | No. tested | No positive |
|----------------------------------------|------------------------------------------------------|---------------------------------------|-------------|------------|-------------|
| Ephemeroptera                          | <i>Baetis muticus</i>                                | Stirling, Scotland, UK                | 2017        | 3          | 0           |
|                                        | <i>Baetis rhodani</i>                                | Stirling, Scotland, UK                | 2017        | 3          | 0           |
|                                        | <i>Cloeon dipterum</i>                               | Cheshire, UK                          | 2016        | 3          | 0           |
|                                        | <i>Ecdyonurus</i> sp.1                               | Stirling, Scotland, UK                | 2017        | 5          | 0           |
|                                        | <i>Ecdyonurus</i> sp.2                               | Cheshire, UK                          | 2016        | 3          | 0           |
|                                        | <i>Ecdyonurus venosus</i>                            | Cheshire, UK                          | 2016        | 6          | 0           |
|                                        | <i>Leptophlebia vespertina</i>                       | Hampshire, UK                         | 2016        | 1          | 0           |
|                                        | <i>Paraleptophlebia submaginata</i>                  | Stirling, Scotland, UK                | 2017        | 3          | 0           |
|                                        | <i>Rhithrogena simicolorata</i>                      | Stirling, Scotland, UK                | 2017        | 3          | 0           |
| Trichoptera                            | <i>Hydropsyche</i> sp.                               | Stirling, Scotland, UK                | 2017        | 3          | 0           |
|                                        | <i>Polycentropus flavomaculatus</i>                  | Cheshire, UK                          | 2017        | 3          | 0           |
|                                        | <b><i>Rhyacophila dorsalis</i></b>                   | <b>Stirling, Scotland, UK</b>         | <b>2017</b> | <b>3</b>   | <b>2</b>    |
| Plecoptera                             | <i>Amphinemura sulcicollis</i>                       | Stirling, Scotland, UK                | 2017        | 3          | 0           |
|                                        | <i>Dinocras cephalotes</i>                           | Stirling, Scotland, UK                | 2017        | 3          | 0           |
|                                        | <i>Isoperla grammatica</i>                           | Stirling, Scotland, UK                | 2017        | 3          | 0           |
|                                        | <i>Perla bipunctata</i>                              | Stirling, Scotland, UK                | 2017        | 3          | 0           |
| Hemiptera                              | <i>Corixa punctata</i>                               | Cheshire, UK                          | 2016        | 1          | 0           |
|                                        | <i>Gerris</i> sp.                                    | Montferrier sur Lez, France           | 2006        | 12         | 0           |
|                                        | <i>Gerris thoracicus</i>                             | Cheshire, UK                          | 2016        | 1          | 0           |
|                                        | <i>Hydrometra stagnorum</i>                          | Montferrier sur Lez, France           | 2006        | 20         | 0           |
|                                        | <i>Nepa cinerea</i>                                  | Montferrier sur Lez, France           | 2006        | 3          | 0           |
|                                        | <i>Notonecta glauca</i>                              | Cheshire, UK                          | 2016        | 2          | 0           |
|                                        | <i>Plea minutissima</i>                              | Notre Dame de Londres, France         | 2006        | 8          | 0           |
|                                        | <i>Sigara lateralis</i>                              | Notre Dame de Londres, France         | 2006        | 6          | 0           |
|                                        | <b><i>Sigara striata</i></b>                         | <b>Cheshire, UK</b>                   | <b>2006</b> | <b>2</b>   | <b>1</b>    |
| Diptera                                | <i>Aedes</i> sp.                                     | Cheshire, UK                          | 2017        | 8          | 0           |
|                                        | <i>Aedes albopictus</i>                              | Roma, Italy                           | 2005        | 20         | 0           |
|                                        | <b><i>Anopheles plumbeus</i></b>                     | <b>Chester Zoo, UK</b>                | <b>2018</b> | <b>2</b>   | <b>2</b>    |
|                                        | <b>Chironomidae</b> sp.                              | <b>Cheshire, UK</b>                   | <b>2016</b> | <b>4</b>   | <b>1</b>    |
|                                        | <i>Chironomus acidophilus</i>                        | Cheshire, UK                          | 2017        | 1          | 0           |
|                                        | <i>Chironomus plumosus</i>                           | Notre Dame de Londres, France         | 2006        | 20         | 0           |
|                                        | <i>Chironomus</i> sp.                                | Cheshire, UK                          | 2016        | 4          | 0           |
|                                        | <i>Culex pipiens</i> (ssp. <i>quinquefasciatus</i> ) | Puerto Viejo de Talamanca, Costa Rica | 2006        | 20         | 0           |
|                                        | <i>Culex pipiens pipiens</i>                         | St Nazaire de Pézan, France           | 2006        | 20         | 0           |
|                                        | <i>Eristalinus</i> sp.                               | Cheshire, UK                          | 2016        | 3          | 0           |
|                                        | <i>Eristalis tenax</i>                               | Montpellier (grotte du zoo), France   | 2002        | 7          | 0           |
|                                        | <b><i>Glyptotendipes</i> sp.</b>                     | <b>Cheshire, UK</b>                   | <b>2016</b> | <b>1</b>   | <b>1</b>    |
|                                        | <b><i>Hilara interstincta</i></b>                    | <b>Cheshire, UK</b>                   | <b>2017</b> | <b>3</b>   | <b>1</b>    |
|                                        | <i>Medetera petrophila</i>                           | St Bauzille de Putois, France         | 2003        | 12         | 0           |
|                                        | <b><i>Simulium aureum</i></b>                        | <b>Hampshire, UK</b>                  | <b>2017</b> | <b>1</b>   | <b>1</b>    |
|                                        | <i>Simulium ornatum</i>                              | N/A                                   | 2003        | 12         | 0           |
|                                        | <i>Tipula</i> sp.                                    | UK                                    | 2006        | 10         | 0           |
|                                        | <i>Tipula oleracea</i>                               | UK                                    | 2006        | 13         | 0           |
|                                        | <b><i>Zavrelimyia</i> sp.</b>                        | <b>Northumberland, UK</b>             | <b>2017</b> | <b>1</b>   | <b>1</b>    |
| Coleoptera                             | <i>Agabus bipustulatus</i>                           | Cheshire, UK                          | 2017        | 3          | 0           |
|                                        | <i>Guignotus pusillus</i>                            | Notre Dame de Londres, France         | 2006        | 12         | 0           |
|                                        | Unknown sp.1                                         | Cheshire, UK                          | 2017        | 2          | 0           |
|                                        | Unknown sp.2                                         | Cheshire, UK                          | 2017        | 3          | 0           |

|            |                                 |                        |             |           |          |
|------------|---------------------------------|------------------------|-------------|-----------|----------|
| Acarina    | Unknown sp.                     | Cheshire, UK           | 2017        | 3         | 0        |
| Isopoda    | <i>Asellus aquaticus</i>        | Cheshire, UK           | 2016        | 3         | 0        |
| Amphipoda  | <i>Gammarus pulex</i>           | Stirling, Scotland, UK | 2017        | 3         | 0        |
|            | <i>Crangonyx pseudogracilis</i> | Cheshire, UK           | 2016        | 6         | 0        |
| Gastropoda | <i>Radix balthica</i>           | Cheshire, UK           | 2016        | 3         | 0        |
|            | <i>Planorbis</i> sp.            | Cheshire, UK           | 2016        | 3         | 0        |
|            | <b><i>Galba truncatula</i></b>  | <b>Cheshire, UK</b>    | <b>2017</b> | <b>20</b> | <b>3</b> |
| Hirudinea  | <i>Erpobdella octaculata</i>    | Cheshire, UK           | 2016        | 2         | 0        |
|            | <i>Hemiclepsis marginata</i>    | Cheshire, UK           | 2017        | 1         | 0        |
| Tricladida | Unknown sp.                     | Cheshire, UK           | 2016        | 1         | 0        |

507

508 A species was deemed positive through PCR and designated to *Rickettsia* group after Sanger

509 sequencing and phylogenetic placement. All strains belong to the Torix group.

510

511

512 **Table 1.2.** Targeted *Rickettsia* screen of terrestrial invertebrates.

513

| Terrestrial Invertebrate group | Species                             | Location                  | Year       | Number tested | Number positive |
|--------------------------------|-------------------------------------|---------------------------|------------|---------------|-----------------|
| Araneae                        | <i>Agelenopsis aperta</i>           | Tennessee, USA            | N/A        | 12            | 0               |
|                                | <i>Allopecosa pulverulenta</i>      | Berne, Germany            | N/A        | 16            | 0               |
|                                | <i>Amaurobius fenestralis</i>       | Montpellier, France       | 2006       | 16            | 0               |
|                                | <i>Araneus diadematus</i>           | Beerse, Belgium           | N/A        | 19            | 0               |
|                                | <i>Araneus diadematus</i>           | Greater London, UK        | N/A        | 8             | 0               |
|                                | <i>Argiope bruennichi</i>           | Hamburg, Germany          | N/A        | 7             | 0               |
|                                | <i>Argiope lobata</i>               | Spain                     | N/A        | 7             | 0               |
|                                | <i>Argiope lobata</i>               | Israel                    | N/A        | 4             | 0               |
|                                | <i>Cyclosa conica</i>               | Brandenburg, Germany      | N/A        | 11            | 0               |
|                                | <i>Dysdera crocata</i>              | Montpellier, France       | 2006       | 2             | 0               |
|                                | <i>Enoplognatha ovata</i>           | Greater London, UK        | N/A        | 20            | 0               |
|                                | <i>Erigone atra</i>                 | Cheshire, UK              | 2017       | 1             | 0               |
|                                | <i>Evarcha falcata</i>              | Beerse, Belgium           | N/A        | 5             | 0               |
|                                | <i>Holochnemus pluchei</i>          | Montpellier, France       | 2006       | 7             | 0               |
|                                | <i>Hylyphantes graminicola</i>      | Cheshire, UK              | 2017       | 1             | 0               |
|                                | <i>Larinioides cornutus</i>         | Greater London, UK        | N/A        | 6             | 0               |
|                                | <i>Larinioides scolopetarius</i>    | Hamburg, Germany          | N/A        | 17            | 0               |
|                                | <b><i>Linyphia triangularis</i></b> | <b>Berlin, Germany</b>    | <b>N/A</b> | <b>9</b>      | <b>9</b>        |
|                                | <i>Linyphia triangularis</i>        | Greater London, UK        | N/A        | 6             | 0               |
|                                | <i>Lycosa</i> sp.                   | Cheshire, UK              | 2017       | 2             | 0               |
|                                | <i>Meta mengei</i>                  | Greater London, UK        | N/A        | 13            | 0               |
|                                | <i>Meta segmentata</i>              | Brandenburg, Germany      | N/A        | 9             | 0               |
|                                | <i>Neriene clathrata</i>            | Beerse, Belgium           | N/A        | 13            | 0               |
|                                | <i>Neriene peltata</i>              | Cheshire, UK              | 2017       | 1             | 0               |
|                                | <i>Pachygnatha degeeri</i>          | Berne, Germany            | N/A        | 11            | 0               |
|                                | <i>Pachygnatha listeri</i>          | Beerse, Belgium           | N/A        | 17            | 0               |
|                                | <i>Pardosa lugubris</i>             | Darmstadt, Germany        | N/A        | 20            | 0               |
|                                | <i>Pardosa pullata</i>              | Brandenburg, Germany      | N/A        | 20            | 0               |
|                                | <i>Pardosa purbeckensis</i>         | Belgium                   | N/A        | 19            | 0               |
|                                | <b><i>Pholcus phalangioides</i></b> | <b>Berlin, Germany</b>    | <b>N/A</b> | <b>20</b>     | <b>17</b>       |
|                                | <b><i>Pisaura mirabilis</i></b>     | <b>Greater London, UK</b> | <b>N/A</b> | <b>12</b>     | <b>1</b>        |
|                                | <i>Tetragnatha montana</i>          | Greater London, UK        | N/A        | 20            | 0               |
|                                | <i>Tetragnatha</i> sp.              | Hampshire, UK             | 2017       | 3             | 0               |
| Unknown sp.                    | Cheshire, UK                        | 2017                      | 2          | 0             |                 |
| <i>Xysticus cristatus</i>      | Cambridgeshire, UK                  | N/A                       | 16         | 0             |                 |

|                                     |                                   |                               |             |           |           |
|-------------------------------------|-----------------------------------|-------------------------------|-------------|-----------|-----------|
| Opiliones                           | <i>Leiobunum rotundum</i>         | Feurs, France                 | 2006        | 6         | 0         |
| Ixodida                             | <i>Ixodes uriae</i>               | Hornøya, Norway               | 2005        | 19        | 0         |
|                                     | <i>Rhipicephalus microplus</i>    | New Caledonia, France         | 2003        | 1         | 0         |
| Scorpiones                          | <i>Euscorpius flavicauda</i>      | St Nazaire de Pézan, France   | 2006        | 1         | 0         |
| Diplopoda                           | <i>Ommatoiulus</i> sp.            | Cheshire, UK                  | 2016        | 1         | 0         |
| Neuroptera                          | Unknown sp.                       | Cheshire, UK                  | 2017        | 1         | 0         |
| Mecoptera                           | <i>Panorpa</i> sp.                | Cheshire, UK                  | 2017        | 2         | 0         |
| Orthoptera                          | <i>Calliptamus italicus</i>       | Notre Dame de Londres, France | 2016        | 18        | 0         |
|                                     | <i>Chorthippus brunneus</i>       | Uk                            | 2006        | 20        | 0         |
|                                     | <i>Grylломорpha dalmatina</i>     | Montpellier, France           | 2006        | 2         | 0         |
| Blattaria                           | <i>Loboptera decipiens</i>        | Montpellier, France           | 2006        | 17        | 0         |
| Mantodae                            | <i>Iris oratoria</i>              | St Nazaire de Pézan, France   | 2006        | 6         | 0         |
|                                     | <i>Mantis religiosa</i>           | Feurs, France                 | 2006        | 3         | 0         |
| Dermaptera                          | <i>Forficula Auricularia</i>      | Feurs, France                 | 2006        | 9         | 0         |
| Hemiptera                           | <i>Aphis fabae</i>                | Montpellier, France           | 2006        | 12        | 0         |
|                                     | <i>Aphis nerii</i>                | Montpellier, France           | 2006        | 8         | 0         |
|                                     | <i>Baizongia pistaciae</i>        | Viols le Fort, France         | 2006        | 12        | 0         |
|                                     | <i>Cicadella viridis</i>          | L'Olme, France                | 2006        | 16        | 0         |
|                                     | <b><i>Cimex lectularius</i></b>   | <b>Yorkshire, UK</b>          | <b>2008</b> | <b>12</b> | <b>12</b> |
|                                     | <i>Elasmucha grisea</i>           | Greater London, UK            | 2006        | 16        | 0         |
|                                     | <i>Graphosoma italicum</i>        | Montpellier, France           | 2006        | 12        | 0         |
|                                     | <i>Lygaeus equestris</i>          | Montpellier, France           | 2006        | 12        | 0         |
|                                     | <i>Notostira elongata</i>         | L'Olme, France                | 2006        | 11        | 0         |
|                                     | <i>Pyrhocoris apterus</i>         | Montpellier, France           | 2006        | 11        | 0         |
| <i>Rhyparochromus vulgaris</i>      | Castelnaudary, France             | 2006                          | 20          | 0         |           |
| Coleoptera                          | <i>Anaspis frontalis</i>          | Mont Barri, France            | 2004        | 12        | 0         |
|                                     | <i>Anthaxia nitidula</i>          | Mont Barri, France            | 2004        | 20        | 0         |
|                                     | <i>Anthaxia</i> sp.               | Mont Barri, France            | 2004        | 16        | 0         |
|                                     | <i>Calvia 14-guttata</i>          | Greater London, UK            | 2006        | 6         | 0         |
|                                     | <i>Capnodis tenebrionis</i>       | Montpellier, France           | 2006        | 1         | 0         |
|                                     | <i>Cetonia aurata</i>             | Feurs, France                 | 2006        | 3         | 0         |
|                                     | <i>Cetonia aurata</i>             | Mont Barri, France            | 2004        | 12        | 0         |
|                                     | <i>Chrysolina varians</i>         | Mont Barri, France            | 2004        | 18        | 0         |
|                                     | <i>Clytus arietis</i>             | Mont Barri, France            | 2004        | 20        | 0         |
|                                     | <i>Dermestes</i> sp.              | Mont Barri, France            | 2004        | 20        | 0         |
|                                     | <i>Dermestes tessellatocollis</i> | Cheshire, UK                  | 2016        | 2         | 0         |
|                                     | <i>Gastrophysa</i> sp.            | Greater London, UK            | 2006        | 20        | 0         |
|                                     | <i>Geotrupes stercorarius</i>     | Mont Barri, France            | 2004        | 3         | 0         |
|                                     | <i>Larinus scolymi</i>            | Aldira de Irmeros, Spain      | 2005        | 12        | 0         |
|                                     | <i>Leptinotarsa decemlineata</i>  | Feurs, France                 | 2006        | 10        | 0         |
|                                     | <i>Leptura livida</i>             | Mont Barri, France            | 2004        | 19        | 0         |
|                                     | <i>Mordellistena</i> sp.          | Mont Barri, France            | 2004        | 10        | 0         |
|                                     | <i>Oedemera</i> sp.               | Mont Barri, France            | 2004        | 20        | 0         |
|                                     | <i>Oncocerna</i> sp.              | Mont Barri, France            | 2004        | 20        | 0         |
| <b><i>Phyllobius argentatus</i></b> | <b>Mont Barri, France</b>         | <b>2004</b>                   | <b>15</b>   | <b>4†</b> |           |
| <i>Stenopterus</i> sp.              | Mont Barri, France                | 2004                          | 20          | 0         |           |
| Diptera                             | <i>Braula coeca</i>               | Ouessant, France              | 2002        | 4         | 0         |
|                                     | <i>Chorisops tunisiae</i>         | Montpellier, France           | 2003        | 8         | 0         |
|                                     | <i>Delia antiqua</i>              | N/A                           | N/A         | 11        | 0         |
|                                     | <i>Delia platura</i>              | N/A                           | N/A         | 11        | 0         |
|                                     | <i>Delia radicum</i>              | N/A                           | N/A         | 10        | 0         |
|                                     | <i>Gasterophilus intestinalis</i> | France                        | N/A         | 10        | 0         |
|                                     | <i>Hippobosca equina</i>          | Restinclières, France         | 2006        | 15        | 0         |
|                                     | <i>Lonchoptera lutea</i>          | Cheshire, UK                  | 2017        | 3         | 0         |
|                                     | <i>Musca domestica</i>            | L'Olme, France                | 2006        | 20        | 0         |
|                                     | <i>Musca vitripennis</i>          | Notre Dame de Londres, France | 2003        | 8         | 0         |

|                                |                                      |                               |             |           |           |
|--------------------------------|--------------------------------------|-------------------------------|-------------|-----------|-----------|
|                                | <i>Neomyia cornicina</i>             | Notre Dame de Londres, France | 2003        | 8         | 0         |
|                                | <i>Protocalliphora</i> sp.           | Corse, France                 | 2003        | 2         | 0         |
|                                | <b><i>Protocalliphora azurea</i></b> | <b>Montpellier, France</b>    | <b>2005</b> | <b>12</b> | <b>12</b> |
|                                | <i>Psila rosae</i>                   | N/A                           | N/A         | 11        | 0         |
|                                | <i>Stomoxys calcitrans</i>           | Le Malzieu, France            | 2001        | 11        | 0         |
| Lepidoptera                    | <i>Chilo phragmitellus</i>           | Feurs, France                 | 2006        | 10        | 0         |
|                                | <i>Euplagia quadripunctaria</i>      | Feurs, France                 | 2006        | 2         | 0         |
|                                | <i>Pieris brassicae</i>              | Feurs, France                 | 2006        | 7         | 0         |
|                                | <i>Plodia interpunctella</i>         | Montpellier, France           | 2006        | 12        | 0         |
|                                | <i>Thymelicus lineola</i>            | Greater London, UK            | 2006        | 15        | 0         |
|                                | <i>Thymelicus sylvestris</i>         | Greater London, UK            | 2006        | 2         | 0         |
|                                | <i>Triodia sylvina</i>               | Montpellier, France           | 2006        | 4         | 0         |
| Hymenoptera                    | <i>Amblyteles armatorius</i>         | St Nazaire de Pézan, France   | 2006        | 1         | 0         |
|                                | <i>Amegilla albigena</i>             | St Nazaire de Pézan, France   | 2006        | 13        | 0         |
|                                | <i>Amegilla ochroleuca</i>           | St Nazaire de Pézan, France   | 2006        | 3         | 0         |
|                                | <i>Anthidium florentinum</i>         | St Nazaire de Pézan, France   | 2006        | 6         | 0         |
|                                | <i>Apis mellifera</i>                | UK                            | 2006        | 9         | 0         |
|                                | <i>Bombus terrestris</i>             | North West, Switzerland       | 2006        | 20        | 0         |
|                                | <i>Diplolepis rosae</i>              | L'Olme, France                | 2006        | 2         | 0         |
|                                | <i>Formica lugubris</i>              | UK                            | 2006        | 10        | 0         |
|                                | <b><i>Pachycrepoideus</i> sp.</b>    | <b>UK</b>                     | <b>N/A</b>  | <b>94</b> | <b>6‡</b> |
|                                | <i>Polistes dominulus</i>            | St Nazaire de Pézan, France   | 2006        | 4         | 0         |
|                                | <i>Polistes nimpha</i>               | St Nazaire de Pézan, France   | 2006        | 19        | 0         |
| <i>Sceliphron caementarium</i> | St Nazaire de Pézan, France          | 2006                          | 3           | 0         |           |

514

515 A species was deemed positive through PCR and designated to *Rickettsia* group after Sanger

516 sequencing and phylogenetic placement. All strains belong to the Torix group except

517 †=Rhyzobius and ‡=Belli.

518

519 **Table 2.** Torix *Rickettsia* hosts known to date alongside screening method.

520

| Order     | Host                                                                | Screening method      | Reference         |
|-----------|---------------------------------------------------------------------|-----------------------|-------------------|
| Amphipoda | <b><i>Paracalliope fluviatilis</i></b><br><b>(Paracalliopiidae)</b> | <b>GenBank search</b> | <b>This study</b> |
|           | <i>Paraleptamphopus</i> sp.<br>(Paraleptamphopidae)                 | Barcoding             | [33]              |
|           | <i>Senticaudata</i> sp.                                             | Barcoding             | [33]              |
| Araneae   | <i>Amaurobioides africana</i><br>(Anyphaenidae)                     | Barcoding             | [32]              |

|                    |                                                                  |                                            |                           |
|--------------------|------------------------------------------------------------------|--------------------------------------------|---------------------------|
|                    | <i>Araneus diadematus</i><br>(Araneidae)                         | Targeted PCR                               | [43]                      |
|                    | <i>Dysdera microdonta</i><br>(Dysderidae)                        | Barcoding                                  | [31]                      |
|                    | <i>Linyphiidae</i> spp.                                          | Targeted PCR                               | [43]                      |
|                    | <b><i>Linyphia triangularis</i></b><br>(Linyphiidae)             | <b>Targeted PCR</b>                        | <b>This study</b>         |
|                    | <b><i>Pholcus phalangioides</i></b><br>(Pholcidae)               | <b>Targeted PCR</b>                        | <b>This study</b>         |
|                    | <b><i>Pisaura mirabilis</i></b><br>(Pisauridae)                  | <b>Targeted PCR</b>                        | <b>This study</b>         |
|                    | <i>Meta mengei</i><br>(Tetragnathidae)                           | Targeted PCR                               | [43]                      |
| Coleoptera         | <i>Deronectes</i> spp.<br>(Dytiscidae)                           | Targeted PCR,<br>FISH and TEM              | [27]                      |
|                    | <b><i>Dytiscidae</i> sp.</b>                                     | <b>Barcoding</b>                           | <b>This study</b>         |
|                    | <i>Stegobium paniceum</i><br>(Ptinidae)                          | Non-targeted<br>(16S) PCR                  | [83]                      |
|                    | <b><i>Prionocyphon limbatus</i></b><br>(Scirtidae)               | <b>Barcoding</b>                           | <b>This study</b>         |
|                    | <b><i>Labidopullus<br/>appendiculatus</i></b><br>(Staphylinidae) | <b>SRA search</b>                          | <b>This study</b>         |
|                    | <b><i>Platyusa sonomae</i></b><br>(Staphylinidae)                | <b>SRA search</b>                          | <b>This study</b>         |
|                    | <b><i>Pseudomimeciton<br/>antennatum</i></b><br>(Staphylinidae)  | <b>SRA search</b>                          | <b>This study</b>         |
|                    | <b><i>Staphylinidae</i> sp.</b>                                  | <b>Barcoding</b>                           | <b>This study</b>         |
|                    | <b><i>Pimelia</i> sp.</b><br>(Tenebrionidae)                     | <b>GenBank<br/>search</b>                  | <b>This study</b>         |
|                    | Dermaptera                                                       | <b><i>Forficula</i> sp. (Forficulidae)</b> | <b>GenBank<br/>search</b> |
| <b>unknown sp.</b> |                                                                  | <b>Barcoding</b>                           | <b>This study</b>         |
| Diplopoda          | <i>Polydesmus complanatus</i><br>(Polydesmidae)                  | Targeted PCR                               | [84]                      |
|                    | <b>unknown sp.</b>                                               | <b>Barcoding</b>                           | <b>This study</b>         |
|                    | <b><i>Protocalliphora azurea</i></b><br>(Calliphoridae)          | <b>Targeted PCR</b>                        | <b>This study</b>         |
|                    | <b><i>Cecidomyiidae</i> sp.</b>                                  | <b>Barcoding</b>                           | <b>This study</b>         |

|             |                                                      |                               |                        |
|-------------|------------------------------------------------------|-------------------------------|------------------------|
| Diptera     | <b><i>Chaoborus trivitattus</i></b><br>(Chaobaridae) | SRA search                    | This study             |
|             | <b><i>Mochlonyx cinctipes</i></b><br>(Chaobaridae)   | SRA search                    | This study             |
|             | <b><i>Glyptotendipes</i> sp.</b><br>(Chironomidae)   | Targeted PCR                  | This study             |
|             | <b><i>Zavrelimyia</i> sp.</b><br>(Chironomidae)      | Targeted PCR                  | This study             |
|             | <i>Culicoides</i> spp.<br>(Ceratopogonidae)          | Targeted PCR<br>and FISH      | [26]                   |
|             | <b><i>Anopheles plumbeus</i></b><br>(Culicidae)      | Targeted PCR                  | This study             |
|             | <i>Dolichopodidae</i> spp.                           | Targeted PCR                  | [44]                   |
|             | <i>Empididae</i> spp.                                | Targeted PCR                  | [44]                   |
|             | <i>Limonia chorea</i><br>(Limoniidae)                | N/A                           | Unpublished (AF322443) |
|             | <b><i>Boletina villosa</i></b><br>(Mycetophilidae)   | Barcoding                     | This study             |
|             | <b><i>Gnoriste bilineata</i></b><br>(Mycetophilidae) | SRA search                    | This study             |
|             | <b><i>Mycetophila lunata</i></b><br>(Mycetophilidae) | GenBank<br>search             | This study             |
|             | <b><i>Psilidae</i> sp.</b>                           | Barcoding                     | This study             |
|             | <i>Lutzomyia apache</i><br>(Psychodidae)             | Targeted PCR                  | [60]                   |
|             | <i>Phlebotomus chinensis</i><br>(Psychodidae)        | Non-targeted<br>(16S) PCR     | [59]                   |
|             | <b><i>Sciaridae</i> sp.</b>                          | Barcoding                     | This study             |
|             | <b><i>Pherbellia tenuipes</i></b><br>(Sciomyzidae)   | Barcoding                     | This study             |
|             | <b><i>Simulium aureum</i></b><br>(Simuliidae)        | Targeted PCR                  | This study             |
|             | <b><i>Tabanidae</i> sp.</b>                          | Barcoding                     | This study             |
| Gastropoda  | <b><i>Galba truncatula</i></b><br>(Lymnaeidae)       | Targeted PCR                  | This study             |
| Haplotaxida | <i>Mesenchytraeus solifugus</i><br>(Enchytraediae)   | Non-targeted<br>(16S) PCR     | [85]                   |
|             | <i>Bemisia tabaci</i><br>(Aleyrodidae)               | Targeted PCR<br>and FISH      | [86]                   |
|             | <i>Nephotettix cincticeps</i><br>(Cicadellidae)      | Targeted PCR,<br>FISH and TEM | [87]                   |
|             | <i>Platypleura kaempferi</i><br>(Cicadidae)          | Non-targeted<br>(16S) PCR     | [88]                   |

|                                  |                                                     |                                 |                        |
|----------------------------------|-----------------------------------------------------|---------------------------------|------------------------|
| Hemiptera                        | <b><i>Cimex lectularius</i></b><br>(Cimicidae)      | Targeted PCR                    | This study/[64]        |
|                                  | <b><i>Sigara striata</i></b> (Corixidae)            | Targeted PCR                    | This study             |
|                                  | <b><i>Metcalfa pruinosa</i></b><br>(Flatidae)       | GenBank search                  | This study             |
|                                  | <b><i>Flavina</i> sp.</b> (Issidae)                 | GenBank search                  | This study             |
|                                  | <i>Centrotus cornutus</i><br>(Membracidae)          | Non-targeted (16S) PCR and TEM  | [89]                   |
|                                  | <i>Gargara genistae</i><br>(Membracidae)            | Non-targeted (16S) PCR and TEM  | [89]                   |
|                                  | <i>Macrolophus pygmaeus</i><br>(Miridae)            | Non-targeted (16S) PCR and FISH | [45]                   |
|                                  | <b><i>Cacopsylla melanoneura</i></b><br>(Psyllidae) | Barcoding                       | This study             |
|                                  | <b><i>Chamaepsylla hartigii</i></b><br>(Psyllidae)  | Barcoding                       | This study             |
| <b><i>Ricaniidae</i> sp.</b>     | Barcoding                                           | This study                      |                        |
| Hirudinea                        | <i>Hemiclepsis</i> spp.<br>(Glossiphoniidae)        | Targeted PCR and TEM            | [23]                   |
|                                  | <i>Torix</i> spp.<br>(Glossiphoniidae)              | Targeted PCR and TEM            | [23]                   |
| Hymenoptera                      | <i>Asobara tabida</i><br>(Braconidae)               | Non-targeted (16S) PCR          | [90]                   |
|                                  | <b><i>Ceraphronidae</i> sp.</b>                     | Barcoding                       | This study             |
|                                  | <b><i>Diapriidae</i> sp.</b>                        | Barcoding                       | This study             |
|                                  | <b><i>Eucharitidae</i> sp.</b>                      | GenBank search                  | This study             |
|                                  | <i>Quadrastichus mendeli</i><br>(Eulophidae)        | Non-targeted (16S) PCR and FISH | [91]                   |
|                                  | <b><i>Formicidae</i> sp.</b>                        | GenBank search                  | This study             |
|                                  | <i>Atta colombica</i><br>(Formicidae)               | Non-targeted (16S) PCR          | Unpublished (LN570502) |
|                                  | <b><i>Megaspilidae</i> sp.</b>                      | Barcoding                       | This study             |
|                                  | <b><i>Mymaridae</i> sp.</b>                         | Barcoding                       | This study             |
| <b><i>Platygastridae</i> sp.</b> | Barcoding                                           | This study                      |                        |
| Ixodida                          | <i>Argas japonica</i> (Argasidae)                   | Non-targeted (16S) PCR          | [63]                   |



|                |                                                            |                           |                   |
|----------------|------------------------------------------------------------|---------------------------|-------------------|
|                | <i>Ixodes ricinus</i> (Ixodidae)                           | Targeted PCR              | [62]              |
| Megaloptera    | <i>Sialis lutaria</i> (Sialidae)                           | Targeted PCR              | [92]              |
| Neuroptera     | <i>Chrysotropia ciliata</i><br>(Chrysopidae)               | Targeted PCR              | [92]              |
| Nucleariida    | <i>Nuclearia pattersoni</i><br>(Nucleariidae)              | Non-targeted<br>(16S) PCR | [24]              |
|                | <i>Pompholyxophrys punicea</i><br>(Pompholyxophryidae)     | Single cell<br>sequencing | [25]              |
| Odonata        | <b><i>Calopteryx maculata</i><br/>(Calopterygidae)</b>     | <b>GenBank<br/>search</b> | <b>This study</b> |
|                | <i>Coenagrionidae</i> spp.                                 | Targeted PCR<br>and FISH  | [28]              |
|                | <i>Sympetrum fonscolombii</i><br>(Libellulidae)            | Targeted PCR              | [28]              |
|                | <i>Polythoridae</i> spp.                                   | Targeted PCR              | [28]              |
|                | <i>Neoneura sylvatica</i><br>(Protoneuridae)               | Targeted PCR              | [28]              |
| Psocoptera     | <b><i>Myopsocidae</i> sp.</b>                              | <b>Barcoding</b>          | <b>This study</b> |
|                | <b><i>Philotarsus californicus</i><br/>(Philotarsidae)</b> | <b>Barcoding</b>          | <b>This study</b> |
|                | <i>Cerobasis guestfalica</i><br>(Trogidae)                 | Targeted PCR<br>and FISH  | [93]              |
| Siphonoptera   | <i>Nosopsyllus fasciatus</i><br>(Ceratophyllidae)          | Targeted PCR              | [61]              |
| Trichoptera    | <b><i>Lepidostoma hoodi</i><br/>(Lepidostomatidae)</b>     | <b>Barcoding</b>          | <b>This study</b> |
|                | <b><i>Rhyacophila dorsalis</i><br/>(Rhyacophilidae)</b>    | <b>Targeted PCR</b>       | <b>This study</b> |
|                | <b><i>Sericostoma</i> sp.<br/>(Sericostomatidae)</b>       | <b>SRA search</b>         | <b>This study</b> |
| Trombidiformes | <b><i>Calyptostomatidae</i> sp.</b>                        | <b>Barcoding</b>          | <b>This study</b> |

521  
522 Bold entries indicate hosts identified in this study. FISH=fluorescence *in-situ* hybridisation;  
523 TEM=transmission electron microscopy; SRA=sequence read archive. Accession numbers for  
524 *Rickettsia* sequences from newly detected hosts can be found in Additional files 6 and 8.

525

## 526 Availability of Supporting Data and Materials

527 The data sets supporting the findings of this study are openly available in:

528 The Barcode of Life Data System (BOLD) repository at <http://dx.doi.org/10.5883/DS-RICKET>  
529 and the Figshare repository at <http://dx.doi.org/10.6084/m9.figshare.12801107> and  
530 <http://dx.doi.org/10.6084/m9.figshare.12801140>.

531 For DNA sequences, EMBL accession codes are: LR798809-LR800243; LR812141-LR812260;  
532 LR812269-LR812283; LR812678; LR813674-LR813676; LR813730.

533

## 534 **Declarations**

### 535 **List of Abbreviations**

536 BOLD=Barcode of Life Data System

537 COI=cytochrome c oxidase I

538 SRA=Sequence Read Archive

539

### 540 **Ethics Approval**

541 Not applicable.

542

### 543 **Consent for Publication**

544 Not applicable.

545

### 546 **Competing Interests**

547 The authors declare that they have no competing interests.

548

### 549 **Funding**

550 This work was supported by: a BBSRC Doctoral Training Partnership studentship  
551 (BB/M011186/1) awarded to JP; a Development and Promotion of Science and Technology  
552 Talents Project (DPST) of the Institute for the Promotion of Teaching Science and Technology,  
553 Thailand to PT and a Harry Smith Vacation studentship (Microbiology society) to HRD.

554

### 555 **Acknowledgments**

556 We would like to thank Dr. Michael Gerth for kindly providing comments on the manuscript.

557

### 558 **Author contributions**

559 JP, GDDH, MB and MAS assisted in the conception and design of the study. MAS, EVZ, SR and  
560 JRD assisted in assembling BOLD datasets and providing DNA extracts for laboratory  
561 experiments. Field and laboratory work was undertaken by JP and PT. SRA work was  
562 undertaken by HRD and SS. Analyses and interpretation of the data were undertaken by JP,  
563 PT, HRD, GDDH, MB and SS, as well as drafting of the manuscript. All authors assisted in critical  
564 revision of the manuscript.

565

### 566 **References**

- 567 1. McFall-Ngai M, Hadfield MG, Bosch TCG, Carey H V., Domazet-Lošo T, Douglas AE, et al.  
568 Animals in a bacterial world, a new imperative for the life sciences. Proc Natl Acad Sci.  
569 2013;110:3229–36.
- 570 2. Hurst GDD. Extended genomes: symbiosis and evolution. Interface Focus.  
571 2017;7:20170001.

- 572 3. Łukasik P, Guo H, van Asch M, Ferrari J, Godfray HCJ. Protection against a fungal pathogen  
573 conferred by the aphid facultative endosymbionts *Rickettsia* and *Spiroplasma* is expressed in  
574 multiple host genotypes and species and is not influenced by co-infection with another  
575 symbiont. *J Evol Biol.* 2013;26:2654–61.
- 576 4. Teixeira L, Ferreira A, Ashburner M. The bacterial symbiont *Wolbachia* induces resistance  
577 to RNA viral infections in *Drosophila melanogaster*. *PLoS Biol.* 2008;6:2753–63.
- 578 5. Rio RVM, Attardo GM, Weiss BL. Grandeur Alliances: Symbiont metabolic integration and  
579 obligate arthropod hematophagy. *Trends Parasitol.* 2016;32:739–49.
- 580 6. Douglas AE. The microbial dimension in insect nutritional ecology. *Funct Ecol.* 2009;23:38–  
581 47.
- 582 7. Hurst GDD, Frost CL. Reproductive parasitism: Maternally inherited symbionts in a  
583 biparental world. *Cold Spring Harb Perspect Biol.* 2015;7:a017699.
- 584 8. Munson MA, Baumann P, Kinsey MG. *Buchnera* gen. nov. and *Buchnera aphidicola* sp.  
585 nov., a taxon consisting of the mycetocyte-associated, primary endosymbionts of aphids. *Int*  
586 *J Syst Bacteriol.* 1991;41:566–8.
- 587 9. Zug R, Hammerstein P. Still a host of hosts for *Wolbachia*: Analysis of recent data suggests  
588 that 40% of terrestrial arthropod species are infected. *PLoS One.* 2012;7:e38544.
- 589 10. Siozios S, Gerth M, Griffin JS, Hurst GDD. Symbiosis: *Wolbachia* host shifts in the fast  
590 lane. *Curr Biol.* 2018;28:R269–71.
- 591 11. Duron O, Bouchon D, Boutin S, Bellamy L, Zhou L, Engelstädter J, et al. The diversity of  
592 reproductive parasites among arthropods: *Wolbachia* do not walk alone. *BMC Biol.*  
593 2008;6:27.

- 594 12. Weinert LA, Araujo-Jnr E V, Ahmed MZ, Welch JJ. The incidence of bacterial  
595 endosymbionts in terrestrial arthropods. *Proc R Soc B*. 2015;282:20150249.
- 596 13. Weinert LA, Werren JH, Aebi A, Stone GN, Jiggins FM. Evolution and diversity of  
597 *Rickettsia* bacteria. *BMC Biol*. 2009;7:6.
- 598 14. Perlman SJ, Hunter MS, Zchori-Fein E. The emerging diversity of *Rickettsia*. *Proc R Soc B*.  
599 2006;273:2097–106.
- 600 15. Ricketts HT. A micro-organism which apparently has a specific relationship to Rocky  
601 Mountain spotted fever. *J Am Med Assoc*. 1909;52:379–80.
- 602 16. da Rocha-Lima H. Zur Aetiologie des Fleckfiebers. *Dtsch Medizinische Wochenschrift*.  
603 1916;53:567–9.
- 604 17. Werren JH, Hurst GD, Zhang W, Breeuwer JA, Stouthamer R, Majerus ME. *Rickettsial*  
605 relative associated with male killing in the ladybird beetle (*Adalia bipunctata*). *J Bacteriol*.  
606 1994;176:388–94.
- 607 18. Chen D-Q, Campbell BC, Purcell AH. A new *Rickettsia* from a herbivorous insect, the pea  
608 aphid *Acyrtosiphon pisum* (Harris). *Curr Microbiol*. 1996;33:123–8.
- 609 19. Hurst GDD, Walker LE, Majerus MEN. Bacterial infections of hemocytes associated with  
610 the maternally inherited male-killing trait in British populations of the two spot ladybird,  
611 *Adalia bipunctata*. *J Invertebr Pathol*. 1996;68:286–92.
- 612 20. Hendry TA, Hunter MS, Baltrus DA. The facultative symbiont *Rickettsia* protects an  
613 invasive whitefly against entomopathogenic *Pseudomonas syringae* strains. *Appl Environ*  
614 *Microbiol*. 2014;80:7161–8.

- 615 21. Himler AG, Adachi-Hagimori T, Bergen JE, Kozuch A, Kelly SE, Tabashnik BE, et al. Rapid  
616 spread of a bacterial symbiont in an invasive whitefly is driven by fitness benefits and female  
617 bias. *Science*. 2011;332:254–6.
- 618 22. Kikuchi Y, Fukatsu T. *Rickettsia* infection in natural leech populations. *Microb Ecol*.  
619 2005;49:265–71.
- 620 23. Kikuchi Y, Sameshima S, Kitade O, Kojima J, Fukatsu T. Novel clade of *Rickettsia* spp. from  
621 leeches. *Appl Environ Microbiol*. 2002;68:999–1004.
- 622 24. Dyková I, Veverková M, Fiala I, Macháčková B, Pecková H. *Nuclearia pattersoni* sp. n.  
623 (Filosea), a new species of amphizoic amoeba isolated from gills of roach (*Rutilus rutilus*),  
624 and its *Rickettsial* endosymbiont. *Folia Parasitol (Praha)*. 2003;50:161–70.
- 625 25. Galindo LJ, Torruella G, Moreira D, Eglit Y, Simpson AGB, Völcker E, et al. Combined  
626 cultivation and single-cell approaches to the phylogenomics of nucleariid amoebae, close  
627 relatives of fungi. *Philos Trans R Soc B Biol Sci*. 2019;374:20190094.
- 628 26. Pilgrim J, Ander M, Garros C, Baylis M, Hurst GDD, Siozios S. *Torix* group *Rickettsia* are  
629 widespread in *Culicoides* biting midges (Diptera: Ceratopogonidae), reach high frequency  
630 and carry unique genomic features. *Environ Microbiol*. 2017;19:4238–55.
- 631 27. Kuchler SM, Kehl S, Dettner K. Characterization and localization of *Rickettsia* sp. in water  
632 beetles of genus *Deronectes* (Coleoptera: Dytiscidae). *FEMS Microbiol Ecol*. 2009;68:201–11.
- 633 28. Thongprem P, Davison HR, Thompson DJ, Lorenzo-Carballea MO, Hurst GDD. Incidence  
634 and diversity of *Torix Rickettsia*–Odonata symbioses. *Microb Ecol*. 2020;In Press. DOI:  
635 10.1007/s00248-020-01568-9

- 636 29. Weinert LA. The diversity and phylogeny of Rickettsia. In: Morand S, Krasnov BR,  
637 Littlewood DTJ, editors. Parasite diversity and diversification. Cambridge: Cambridge  
638 University Press; 2015. p. 150–81.
- 639 30. Lagrue C, Joannes A, Poulin R, Blasco-Costa I. Genetic structure and host-parasite co-  
640 divergence: evidence for trait-specific local adaptation. *Biol J Linn Soc.* 2016;118:344–58.
- 641 31. Řezáč M, Gasparo F, Král J, Heneberg P. Integrative taxonomy and evolutionary history of  
642 a newly revealed spider *Dysdera ninnii* complex (Araneae: Dysderidae). *Zool J Linn Soc.*  
643 2014;172:451–74.
- 644 32. Ceccarelli FS, Haddad CR, Ramírez MJ. Endosymbiotic Rickettsiales (Alphaproteobacteria)  
645 from the spider genus *Amaurobioides* (Araneae: Anyphaenidae). *J Arachnol.* 2016;44:251–3.
- 646 33. Park E, Poulin R. Torix group Rickettsia are widespread in New Zealand freshwater  
647 amphipods: using blocking primers to rescue host COI sequences. *BioRxiv.* 2020; DOI:  
648 10.1101/2020.05.28.120196
- 649 34. Smith MA, Bertrand C, Crosby K, Eveleigh ES, Fernandez-Triana J, Fisher BL, et al.  
650 *Wolbachia* and DNA barcoding insects: Patterns, potential, and problems. *PLoS One.*  
651 2012;7:e36514.
- 652 35. BOLD: Barcode of Life Data System. 2007. <https://www.boldsystems.org/>  
653 Accessed 2 January 2018.
- 654 36. Smith MA, Pilgrim J, Zakharov E V., Dewaard JR, Ratnasingham S. BOLD contaminant pool  
655 (3,817 specimens) data. Figshare. 2020. DOI: 10.6084/m9.figshare.12801107
- 656 37. Smith MA, Pilgrim J, Zakharov E V., Dewaard JR, Ratnasingham S. BOLD non-contaminant  
657 pool (55,366 specimens) data. *Barcoding Of Life Data System.* 2020. DOI: 10.5883/DS-RICKET

- 658 38. Ratnasingham S, Hebert PDN. BOLD: The Barcode of Life Data System. *Mol Ecol Notes*.  
659 2007;7:355–64.
- 660 39. Davison HR, Siozios S. Rickettsia PhyloFlash and Kraken data from arthropod whole  
661 genome projects in the Sequence Read Archive. Figshare. 2020. DOI:  
662 10.6084/m9.figshare.12801140
- 663 40. Gruber-Vodicka HR, Seah BK, Pruesse E. phyloFlash — Rapid SSU rRNA profiling and  
664 targeted assembly from metagenomes. *bioRxiv*. 2019. DOI: 10.1101/521922
- 665 41. Hernández-Triana LM, Prosser SW, Rodríguez-Perez MA, Chaverri LG, Hebert PDN, Ryan  
666 Gregory T. Recovery of DNA barcodes from blackfly museum specimens (Diptera: Simuliidae)  
667 using primer sets that target a variety of sequence lengths. *Mol Ecol Resour*. 2014;14:508–  
668 18.
- 669 42. Wang Z, Wu M. An integrated phylogenomic approach toward pinpointing the origin of  
670 mitochondria. *Sci Rep*. 2015;5:7949.
- 671 43. Goodacre SL, Martin OY, Thomas CFG, Hewitt GM. Wolbachia and other endosymbiont  
672 infections in spiders. *Mol Ecol*. 2006;15:517–27.
- 673 44. Martin OY, Puniamoorthy N, Gubler A, Wimmer C, Bernasconi M V. Infections with  
674 Wolbachia, Spiroplasma, and Rickettsia in the Dolichopodidae and other Empidoidea. *Infect*  
675 *Genet Evol*. 2013;13:317–30.
- 676 45. Machtelinckx T, Van Leeuwen T, Van De Wiele T, Boon N, De Vos WH, Sanchez J-A, et al.  
677 Microbial community of predatory bugs of the genus *Macrolophus* (Hemiptera: Miridae).  
678 *BMC Microbiol*. 2012;12:S9.



679 46. Plantard O, Bouju-Albert A, Malard MA, Hermouet A, Capron G, Verheyden H. Detection  
680 of *Wolbachia* in the tick *Ixodes ricinus* is due to the presence of the hymenoptera  
681 endoparasitoid *Ixodiphagus hookeri*. *PLoS One*. 2012;7:e30692.

682 47. Le Clec'h W, Chevalier FD, Genty L, Bertaux J, Bouchon D, Sicard M. Cannibalism and  
683 predation as paths for horizontal passage of *Wolbachia* between terrestrial isopods.

684 48. Ramage T, Martins-Simoes P, Mialdea G, Allemand R, Duplouy A, Rousse P, et al. A DNA  
685 barcode-based survey of terrestrial arthropods in the Society Islands of French Polynesia:  
686 host diversity within the SymbioCode Project. *Eur J Taxon*. 2017;272.

687 49. Vavre F, Fleury F, Lepetit D, Fouillet P, Bouletreau M. Phylogenetic evidence for  
688 horizontal transmission of *Wolbachia* in host- parasitoid associations. *Mol Biol Evol*.  
689 1999;16:1711–23.

690 50. Ahmed MZ, Li S-J, Xue X, Yin X-J, Ren S-X, Jiggins FM, et al. The intracellular bacterium  
691 *Wolbachia* uses parasitoid wasps as phoretic vectors for efficient horizontal transmission.  
692 Hurst G, editor. *PLOS Pathog*. 2015;11:e1004672.

693 51. Caspi-Fluger A, Inbar M, Mozes-Daube N, Katzir N, Portnoy V, Belausov E, et al.  
694 Horizontal transmission of the insect symbiont *Rickettsia* is plant-mediated. *Proc R Soc B Biol*  
695 *Sci*. 2012;279:1791–6.

696 52. Gonella E, Pajoro M, Marzorati M, Crotti E, Mandrioli M, Pontini M, et al. Plant-mediated  
697 interspecific horizontal transmission of an intracellular symbiont in insects. *Sci Rep*.  
698 2015;5:15811.

699 53. Li Y-H, Ahmed MZ, Li S-J, Lv N, Shi P-Q, Chen X-S, et al. Plant-mediated horizontal  
700 transmission of *Rickettsia* endosymbiont between different whitefly species. *FEMS Microbiol*  
701 *Ecol*. 2017;93.

702 54. Jaenike J, Polak M, Fiskin A, Helou M, Minhas M. Interspecific transmission of  
703 endosymbiotic Spiroplasma by mites. *Biol Lett.* 2007;3:23–5.

704 55. Morrow JL, Frommer M, Shearman DCA, Riegler M. Tropical tephritid fruit fly community  
705 with high incidence of shared Wolbachia strains as platform for horizontal transmission of  
706 endosymbionts. *Environ Microbiol.* 2014;16:3622–37.

707 56. Goodacre SL, Martin OY, Bonte D, Hutchings L, Woolley C, Ibrahim K, et al. Microbial  
708 modification of host long-distance dispersal capacity. *BMC Biol.* 2009;7:32.

709 57. Giorgini M, Bernardo U, Monti MM, Nappo AG, Gebiola M. Rickettsia symbionts cause  
710 parthenogenetic reproduction in the parasitoid wasp *Pnigalio soemius* (Hymenoptera:  
711 Eulophidae). *Appl Environ Microbiol.* 2010;76:2589–99.

712 58. Hagimori T, Abe Y, Date S, Miura K. The first finding of a Rickettsia bacterium associated  
713 with parthenogenesis induction among insects. *Curr Microbiol.* 2006;52:97–101.

714 59. Li K, Chen H, Jiang J, Li X, Xu J, Ma Y. Diversity of bacteriome associated with  
715 *Phlebotomus chinensis* (Diptera: Psychodidae) sand flies in two wild populations from China.  
716 *Sci Rep.* 2016;6:36406.

717 60. Reeves WK, Kato CY, Gilchrist T. Pathogen screening and bionomics of *Lutzomyia*  
718 *apache* (Diptera: Psychodidae) in Wyoming, USA. *J Am Mosq Control Assoc.* 2008;24:444–7.

719 61. Song S, Chen C, Yang M, Zhao S, Wang B, Hornok S, et al. Diversity of Rickettsia species in  
720 border regions of northwestern China. *Parasit Vectors.* 2018;11:634.

721 62. Yan P, Qiu Z, Zhang T, Li Y, Wang W, Li M, et al. Microbial diversity in the tick *Argas*  
722 *japonicus* (Acari: Argasidae) with a focus on Rickettsia pathogens. *Med Vet Entomol.*  
723 2019;33:327–35.

- 724 63. Floris R, Yurtman AN, Margoni EF, Mignozzi K, Boemo B, Altobelli A, et al. Detection and  
725 identification of *Rickettsia* species in the Northeast of Italy. *Vector-Borne Zoonotic Dis.*  
726 2008;8:777–82.
- 727 64. Potts R, Molina I, Sheele JM, Pietri JE. Molecular detection of *Rickettsia* infection in field-  
728 collected bed bugs. *New Microbes New Infect.* 2020;34:100646.
- 729 65. Parola P, Paddock CD, Raoult D. Tick-borne Rickettsioses around the world: Emerging  
730 diseases challenging old concepts. *Clin Microbiol Rev.* 2005;18:719–56.
- 731 66. Hoffmann AA, Ross PA, Rašić G. *Wolbachia* strains for disease control: ecological and  
732 evolutionary considerations. *Evol Appl.* 2015;8:751–68.
- 733 67. Iturbe-Ormaetxe I, Walker T, O’Neill SL. *Wolbachia* and the biological control of  
734 mosquito-borne disease. *EMBO Rep.* 2011;12:508–18.
- 735 68. van den Hurk AF, Hall-Mendelin S, Pyke AT, Frentiu FD, McElroy K, Day A, et al. Impact of  
736 *Wolbachia* on infection with chikungunya and yellow fever viruses in the mosquito vector  
737 *Aedes aegypti*. *PLoS Negl Trop Dis.* 2012;6.
- 738 69. Kliot A, Cilia M, Czosnek H, Ghanim M. Implication of the bacterial endosymbiont  
739 *Rickettsia* spp. in interactions of the whitefly *Bemisia tabaci* with Tomato yellow leaf curl  
740 virus. *J Virol.* 2014;88:5652–60.
- 741 70. Tedeschi R, Visentin C, Alam A, Bosco D. Epidemiology of apple proliferation (AP) in  
742 northwestern Italy: evaluation of the frequency of AP-positive psyllids in naturally infected  
743 populations of *Cacopsylla melanoneura* (Homoptera: Psyllidae). *Ann Appl Biol.*
- 744 71. Katoh K, Standley DM. MAFFT Multiple sequence alignment software version 7:  
745 Improvements in performance and usability. *Mol Biol Evol.* 2013;30:772–80.

- 746 72. Castresana J. Selection of conserved blocks from multiple alignments for their use in  
747 phylogenetic analysis. *Mol Biol Evol.* 2000;17:540–52.
- 748 73. Kalyaanamoorthy S, Minh BQ, Wong TKF, von Haeseler A, Jermiin LS. ModelFinder: fast  
749 model selection for accurate phylogenetic estimates. *Nat Methods.* 2017;14:587–9.
- 750 74. Nguyen LT, Schmidt HA, Von Haeseler A, Minh BQ. IQ-TREE: A fast and effective  
751 stochastic algorithm for estimating maximum-likelihood phylogenies. *Mol Biol Evol.*  
752 2015;32:268–74.
- 753 75. Hoang DT, Chernomor O, Haeseler A von, Minh BQ, Vinh LS. UFBoot2: Improving the  
754 ultrafast bootstrap approximation. *Mol Biol Evol.* 2017;35:518–22.
- 755 76. He Z, Zhang H, Gao S, Lercher MJ, Chen W-H, Hu S. Evolview v2: an online visualization  
756 and management tool for customized and annotated phylogenetic trees. *Nucleic Acids Res.*  
757 2016;44:W236–41.
- 758 77. Fredslund J, Schauser L, Madsen LH, Sandal N, Stougaard J. PriFi: using a multiple  
759 alignment of related sequences to find primers for amplification of homologs. *Nucleic Acids*  
760 *Res.* 2005;33:W516–20.
- 761 78. Martin DP, Murrell B, Golden M, Khoosal A, Muhire B. RDP4: Detection and analysis of  
762 recombination patterns in virus genomes. *Virus Evol.* 2015;1:1–5.
- 763 79. Chernomor O, von Haeseler A, Minh BQ. Terrace aware data structure for phylogenomic  
764 inference from supermatrices. *Syst Biol.* 2016;65:997–1008.
- 765 80. Okonechnikov K, Golosova O, Fursov M. Unipro UGENE: a unified bioinformatics toolkit.  
766 *Bioinformatics.* 2012;28:1166–7.
- 767 81. Ewing B, Hillier L, Wendl MC, Green P. Base-calling of automated sequencer traces using  
768 Phred. I. Accuracy Assessment. *Genome Res.* 1998;8:175–85.

- 769 82. Wood DE, Lu J, Langmead B. Improved metagenomic analysis with Kraken 2. *Genome*  
770 *Biol.* 2019;20:257.
- 771 83. Kölsch G, Synefiaridou D. Shared ancestry of symbionts? *Sagrinae* and *Donaciinae*  
772 (Coleoptera, Chrysomelidae) harbor similar bacteria. *Insects.* 2012;3:473–91.
- 773 84. Li K, Stanojević M, Stamenković G, Ilić B, Paunović M, Lu M, et al. Insight into diversity of  
774 bacteria belonging to the order Rickettsiales in 9 arthropods species collected in Serbia. *Sci*  
775 *Rep.* 2019;9:18680.
- 776 85. Murakami T, Segawa T, Bodington D, Dial R, Takeuchi N, Kohshima S, et al. Census of  
777 bacterial microbiota associated with the glacier ice worm *Mesenchytraeus solifugus*. *FEMS*  
778 *Microbiol Ecol.* 2015;91.
- 779 86. Wang H, Lei T, Wang X, Maruthi MN, Zhu D, Cameron SL, et al. A newly recorded  
780 *Rickettsia* of the *Torix* group is a recent intruder and an endosymbiont in the whitefly  
781 *Bemisia tabaci*. *Environ Microbiol.* 2020;22:1207–21.
- 782 87. Noda H, Watanabe K, Kawai S, Yukuhiro F, Miyoshi T, Tomizawa M, et al. Bacteriome-  
783 associated endosymbionts of the green rice leafhopper *Nephotettix cincticeps* (Hemiptera:  
784 *Cicadellidae*). *Appl Entomol Zool.* 2012;47:217–25.
- 785 88. Zheng Z, Wang D, He H, Wei C. Bacterial diversity of bacteriomes and organs of  
786 reproductive, digestive and excretory systems in two cicada species (Hemiptera: *Cicadidae*).  
787 Munderloh UG, editor. *PLoS One.* 2017;12:e0175903.
- 788 89. Kobiałka M, Michalik A, Świerczewski D, Szklarzewicz T. Complex symbiotic systems of  
789 two treehopper species: *Centrotus cornutus* (Linnaeus, 1758) and *Gargara genistae*  
790 (Fabricius, 1775) (Hemiptera: Cicadomorpha: Membracoidea: Membracidae). *Protoplasma.*  
791 2020;257:819–31.

- 792 90. Zouache K, Voronin D, Tran-Van V, Mavingui P. Composition of bacterial communities  
793 associated with natural and laboratory populations of *Asobara tabida* infected with  
794 *Wolbachia*. *Appl Environ Microbiol.* 2009;75:3755–64.
- 795 91. Gualtieri L, Nugnes F, Nappo AG, Gebiola M, Bernardo U. Life inside a gall: closeness  
796 does not favour horizontal transmission of *Rickettsia* between a gall wasp and its parasitoid.  
797 *FEMS Microbiol Ecol.* 2017;93.
- 798 92. Gerth M, Wolf R, Bleidorn C, Richter J, Sontowski R, Unrein J, et al. Green lacewings  
799 (*Neuroptera: Chrysopidae*) are commonly associated with a diversity of *Rickettsial*  
800 endosymbionts. *Zool Lett.* 2017;3:12.
- 801 93. Perotti MA, Clarke HK, Turner BD, Braig HR. *Rickettsia* as obligate and mycetomic  
802 bacteria. *FASEB J.* 2006;20:2372–4.

803

## 804 **Figure Legends**

805 **Figure 1.** Workflow of the BOLD project demonstrating the acquisition and fates of  
806 contaminant and non-contaminant *COI* barcoding sequences.

807

808 **Figure 2.** Cladogram of the maximum likelihood (ML) tree of 1,126 proteobacteria *COI* contaminants  
809 retrieved from a BOLD project incorporating 184,585 arthropod specimens. The tree is based on 561  
810 bp and is rooted with the free-living alphaproteobacteria *Pelagibacter ubique*. Parantheses indicate  
811 the number of BOLD contaminants present in each group. Tips are labelled by BOLD processing ID and  
812 host arthropod taxonomy. No colour=Non-BOLD Reference. The *Rickettsiales* sequences of  
813 *Anaplasma*, *Neorickettsia*, *Rickettsia* and *Wolbachia* supergroups (A, B, E, F and H) are included as  
814 references (Accession numbers: Additional file 8).

815  
816 **Figure 3.** Cladogram of a maximum likelihood (ML) tree of 753 *COI Rickettsia* contaminants retrieved  
817 from a BOLD project incorporating 184,585 arthropod specimens. The tree is based on 561 bp and  
818 is rooted by the *Rickettsia* endosymbiont of *Ichthyophthirius multifiliis* (Candidatus Megaira) using  
819 the TVM+F+I+G4 model. Parantheses indicate the number of BOLD contaminants present in Torix  
820 and non-Torix *Rickettsia* groups. Tips are labelled by BOLD processing ID and host arthropod  
821 taxonomy. No colour=Non-BOLD reference sequence unless designated by a circle (Dermaptera),  
822 star (Diplopoda), triangle (Thysanoptera). The *Rickettsia* groups: Spotted fever, Transitional, Belli,  
823 Typhus, Rhyzobius and Torix are included as references (Accession numbers: Additional file 8).

824  
825 **Figure 4.** Phylogram of the maximum likelihood (ML) tree of 99 *COI Rickettsia* contaminants (prefix  
826 "BIOUG") used for further phylogenetic analysis and 53 Non-BOLD reference profiles (Accession  
827 numbers: Additional file 8). The tree is based on the concatenation of 4 loci; *16S rRNA*, *17KDa*, *gltA* and  
828 *COI* under a partition model, with profiles containing at least 3 out of 4 sites included in the tree (2,834  
829 bp total) and is rooted by *Rickettsia* endosymbiont of *Ichthyophthirius multifiliis* (Candidatus Megaira).  
830 Tips are labelled by host arthropod taxonomy.

831  
832 **Figure 5.** *16S rRNA* and *gltA* concatenated maximum likelihood (ML) phylogram (1,834 bp total)  
833 including *Rickettsia* hosts from SRA (Triangles) and targeted screens (Stars). The TIM3+F+R2 (16S)  
834 and K3Pu+F+G4 (*gltA*) models were chosen as best fitting models. Rooting is with *Orientia*  
835 *tsutsugamushi*. Accession numbers found in Additional file 8.

836

837 **Figure 6.** Phylogram of a maximum likelihood (ML) tree of *COI Rickettsia* contaminants (prefix  
838 “BIOUG”) giving a host barcode and 43 Non-BOLD reference profiles. The tree is based on 4 loci;  
839 *16S rRNA*, *17KDa*, *gltA* and *COI* under a partition model with profiles containing at least 2 out of  
840 4 sites included in the tree (2,781 bp total) and is rooted by the *Rickettsia* endosymbiont of  
841 *Ichthyophthirius multifiliis* (Candidatus Megaira). The habitats and lifestyles of the host are given  
842 to the right of the phylogeny. Accession numbers found in Additional file 8.

843

#### 844 **Additional file information**

845 **Additional file 1.png** Collection sites of the 753 *COI Rickettsia* contaminants retrieved from BOLD  
846 projects.

847

848 **Additional file 2.docx** Primer pairs involved in the unintended amplification of 753 *Rickettsia*  
849 *COI* from BOLD project.

850

851 **Additional file 3.docx** Homology of *Rickettsia* groups and *Wolbachia* to the most common  
852 forward primers (C\_LepFolF and C\_LepFolR) attributed to bacterial *COI* amplification from  
853 arthropod DNA extracts.

854

855 **Additional file 4.xlsx** Re-barcoding status and nearest BLAST hit of mtDNA *COI* arthropod DNA  
856 extracts accessed for further analysis, along with the success of multilocus *Rickettsia* profiles  
857 with allocated *Rickettsia* group (based on phylogenetic analysis) and co-infection status.

858



859 **Additional file 5.docx** The barcoding success rate of taxa which gave at least one bacteria *COI*  
860 inadvertent amplification (N=51,475 accessible specimens) with an adjusted *Rickettsia*  
861 prevalence based on an estimated total number of arthropods to account for inaccessible  
862 specimens (N=184,585).

863

864 **Additional file 6.docx** GenBank matches mistaken for true mtDNA barcodes and their  
865 homology to *Rickettsia COI* (Accessed 29<sup>th</sup> June 2020).

866

867 **Additional file 7.pdf** Phylogram of a maximum likelihood (ML) tree of *COI Rickettsia* found in the  
868 GenBank database erroneously identified as mtDNA barcodes based on 577 bp. The HKY+F+G4  
869 model was chosen as the best fitting model using Modelfinder with the Bayesian information  
870 criterion (BIC).

871

872 **Additional file 8.xlsx** Accession numbers used for phylogenetic analyses (Figures 2, 3, 4 ,5 and  
873 6). Accession numbers generated in this study are marked in BOLD.

874

875 **Additional file 9.docx** Mitochondrial *COI* and bacterial gene primers used for re-barcoding and  
876 multilocus phylogenetic analyses.

877

878

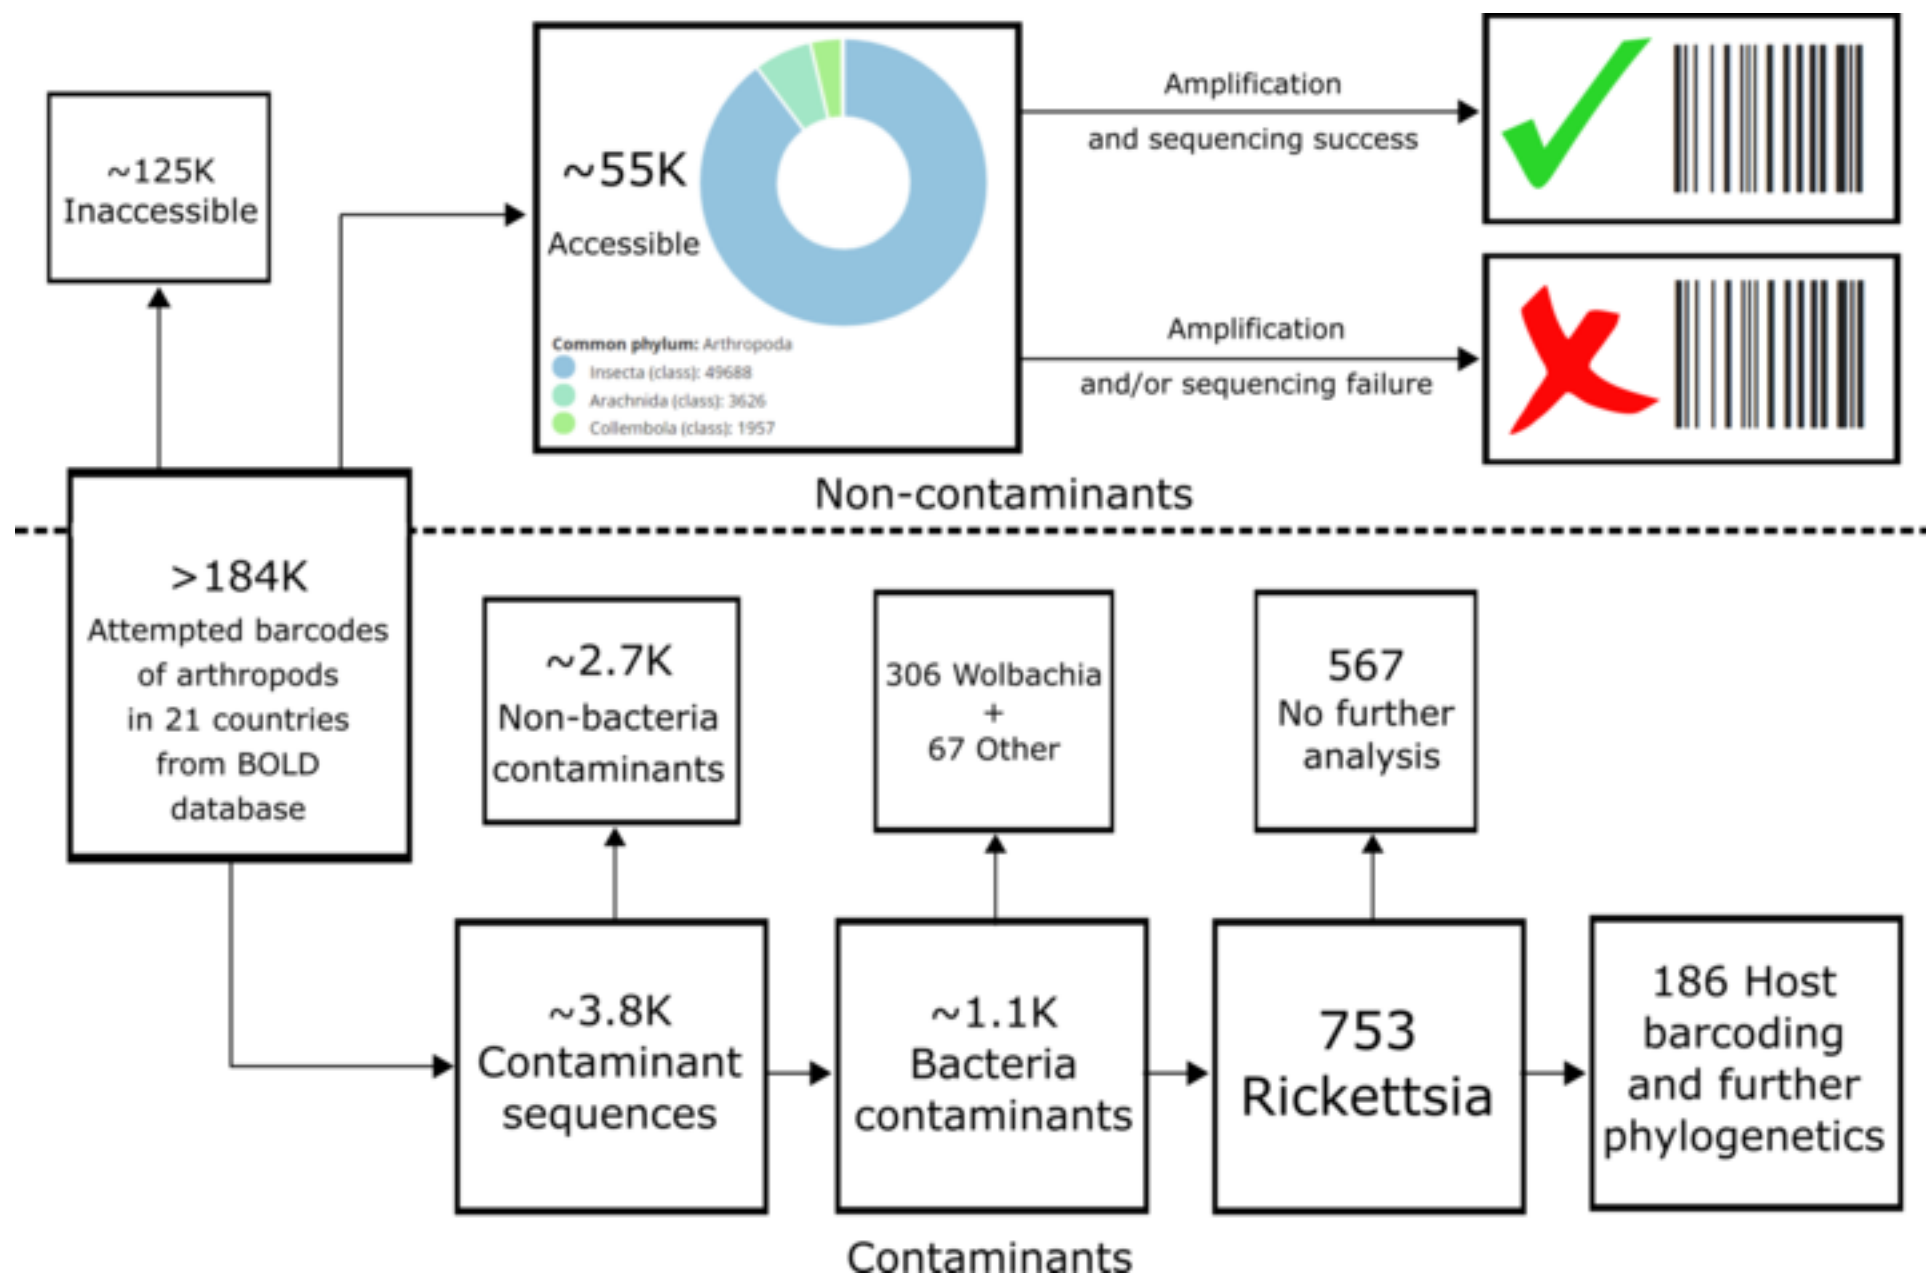

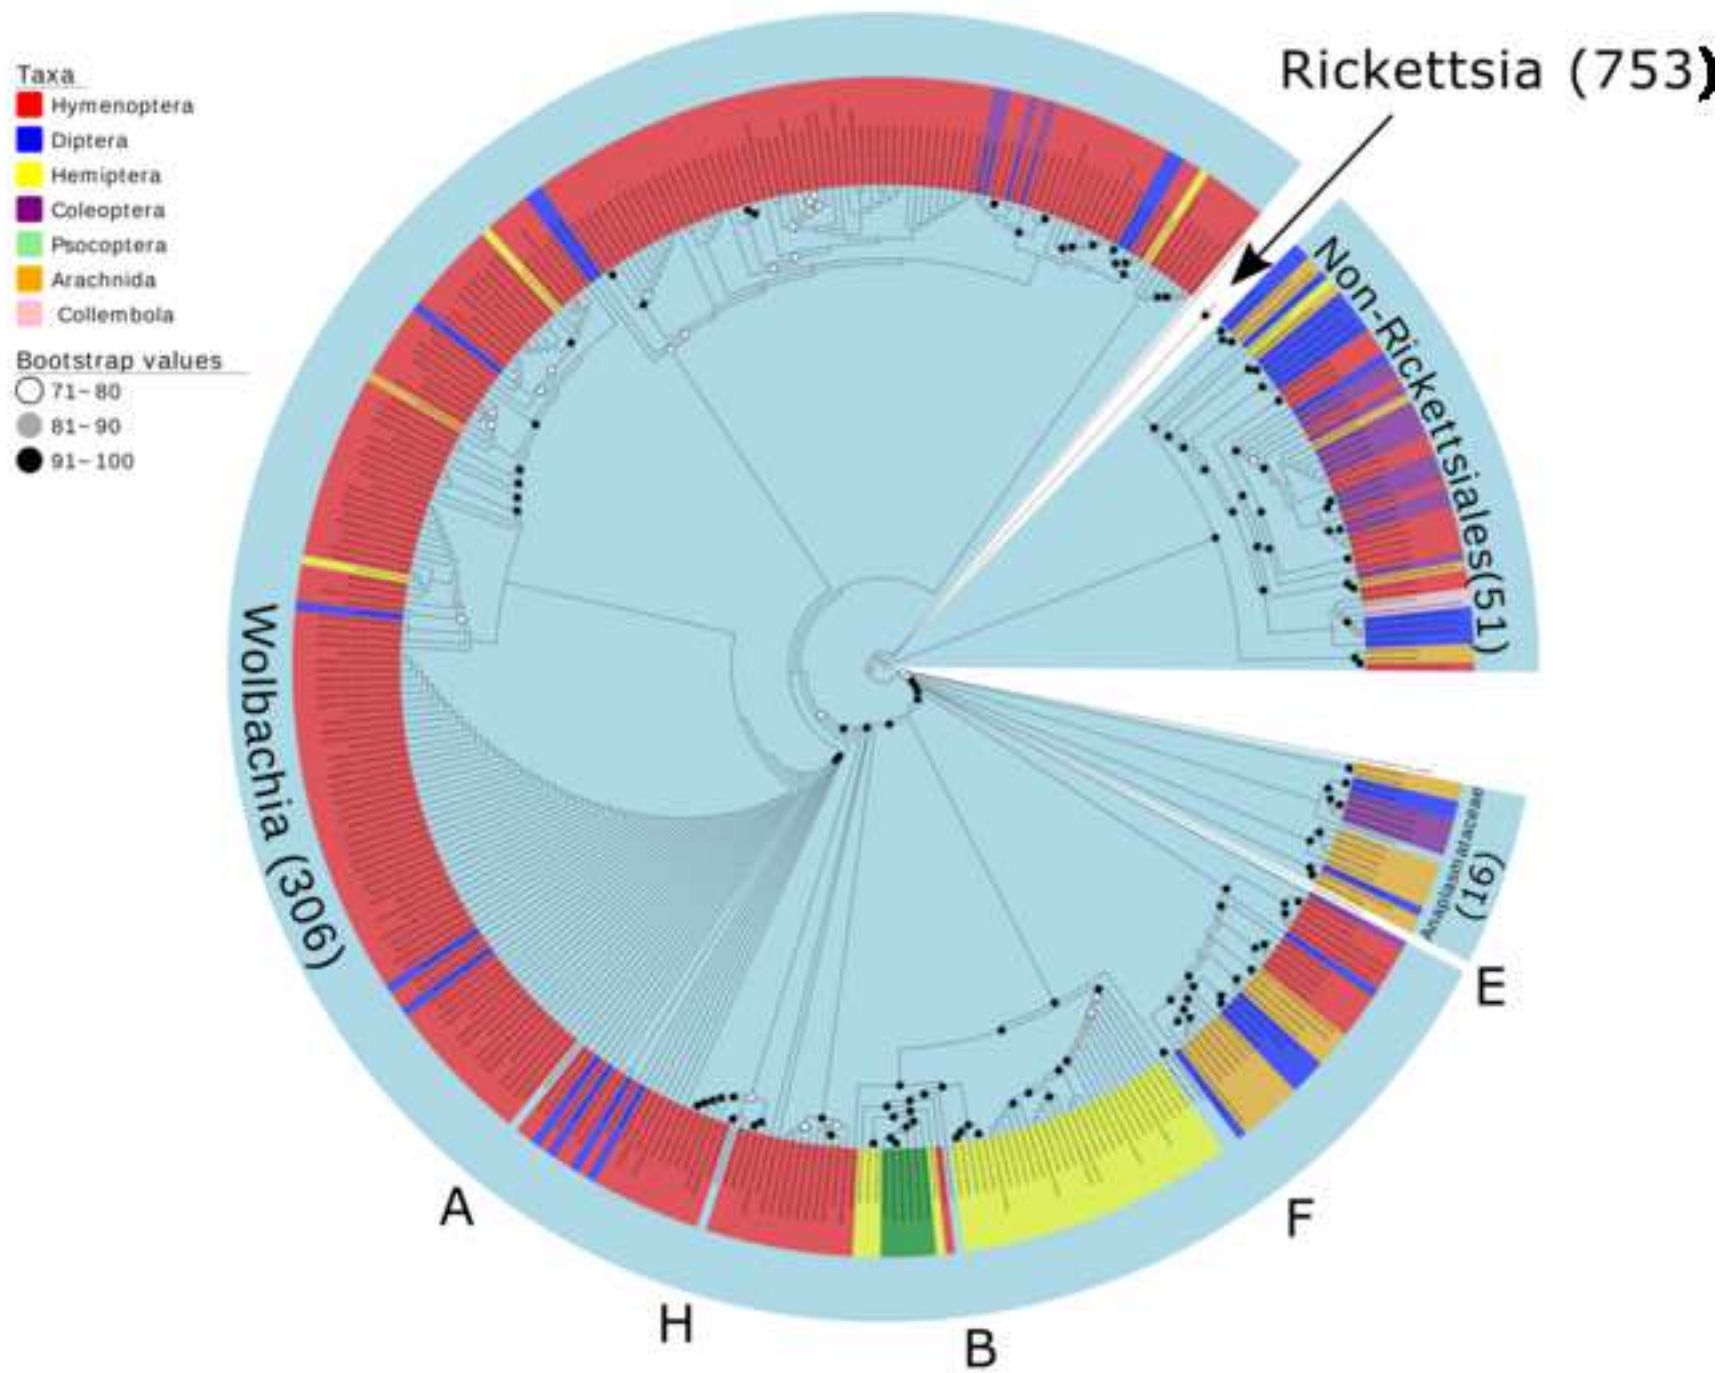

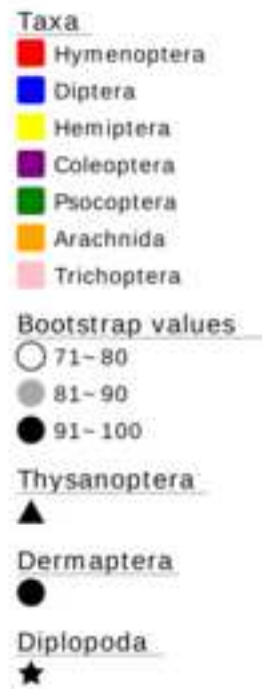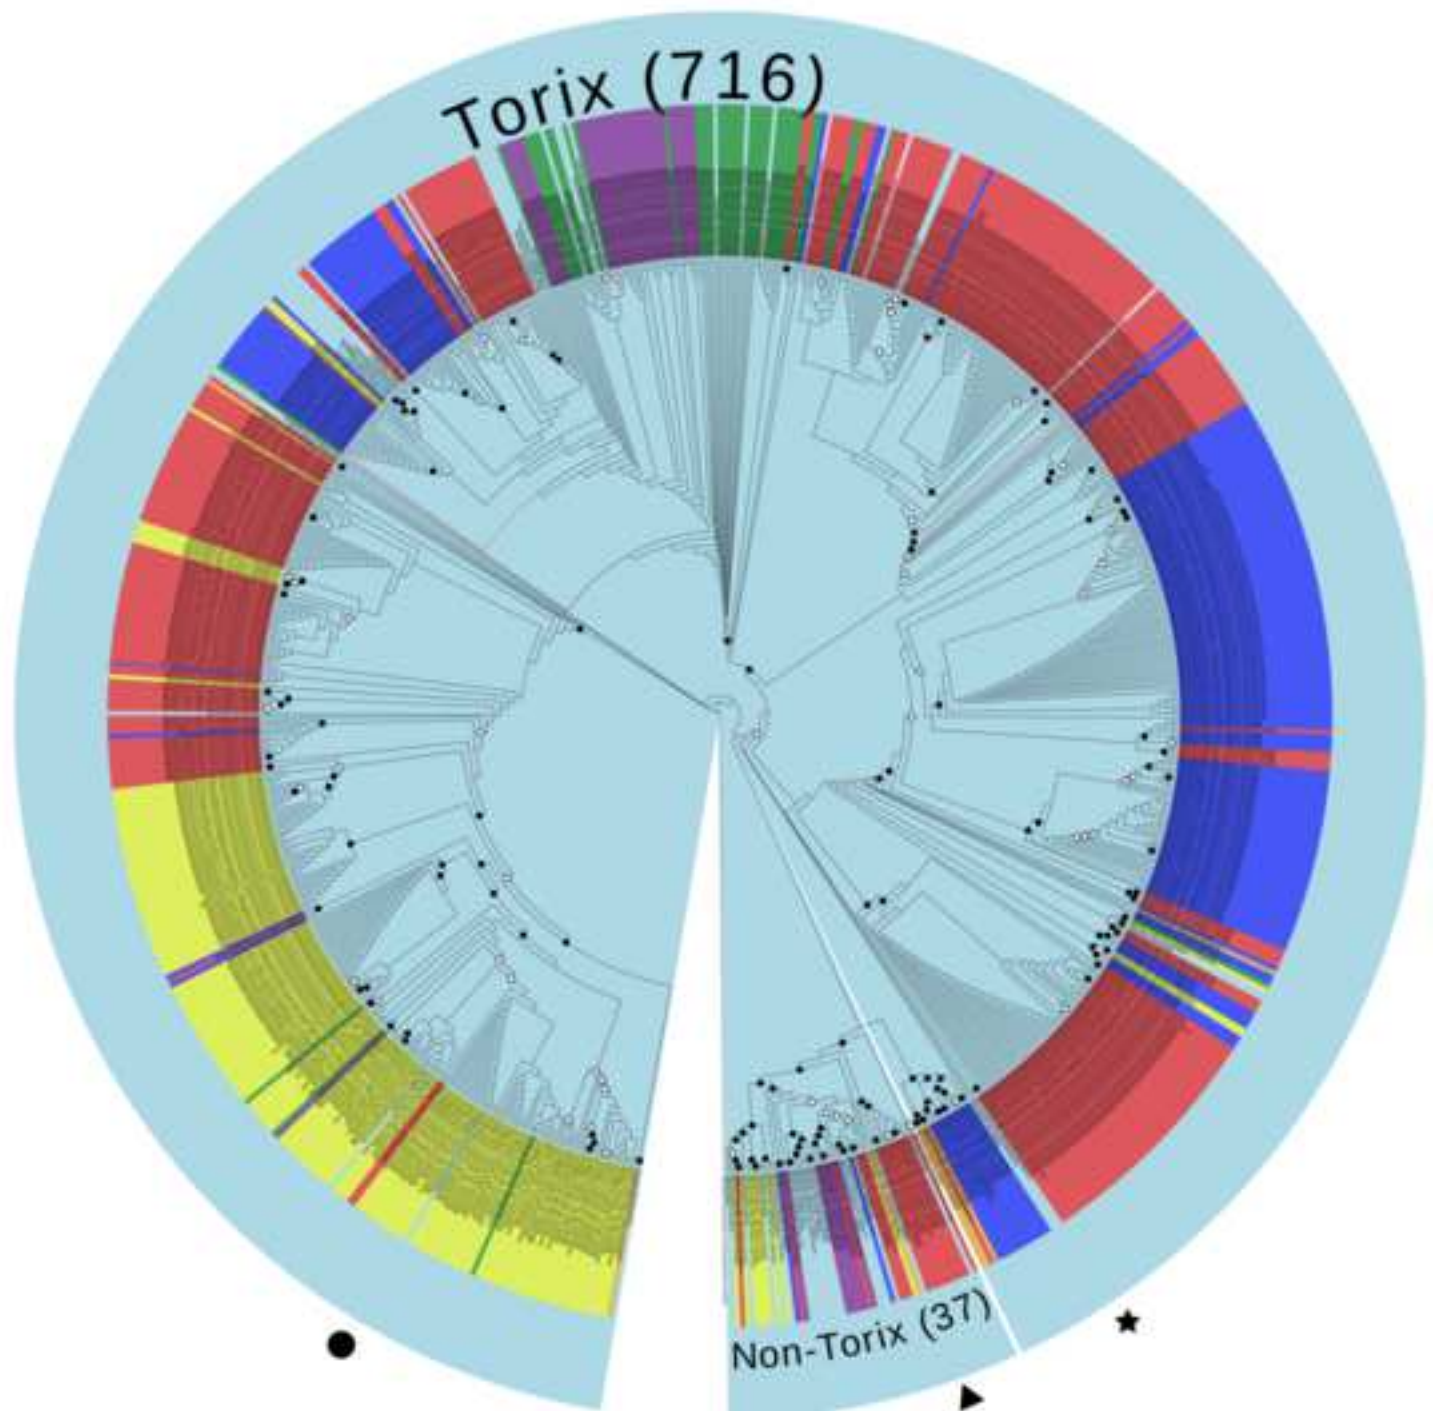



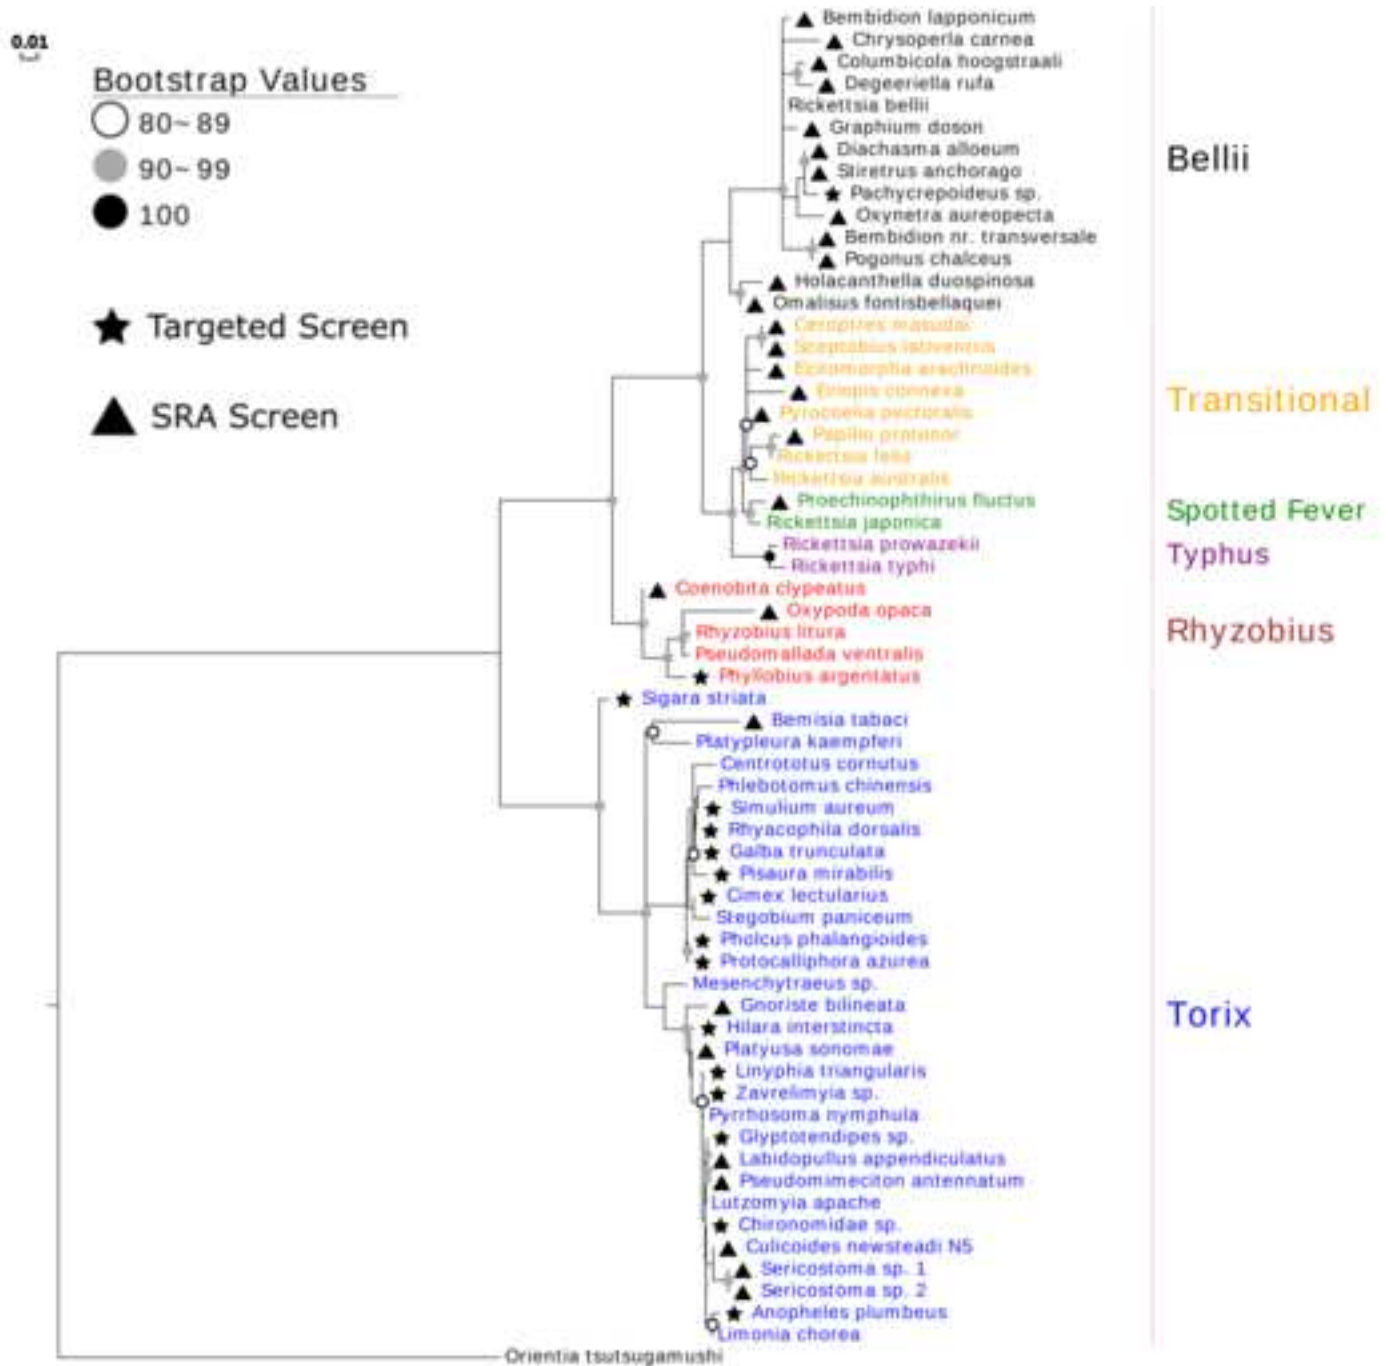



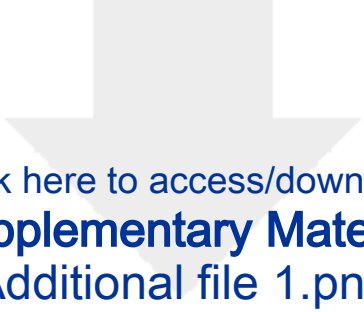

Click here to access/download  
**Supplementary Material**  
Additional file 1.png





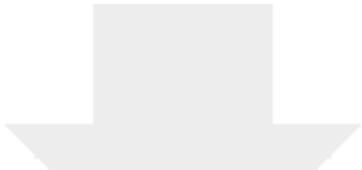

Click here to access/download  
**Supplementary Material**  
Additional file 2.docx



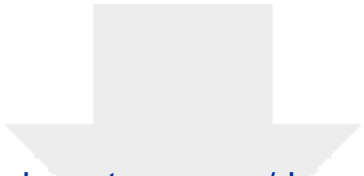

Click here to access/download  
**Supplementary Material**  
Additional file 3.docx



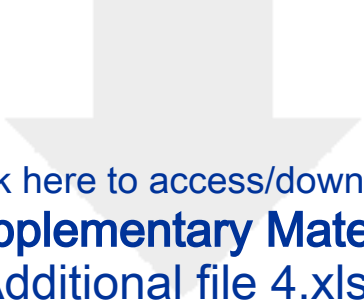

Click here to access/download  
**Supplementary Material**  
Additional file 4.xlsx





Click here to access/download  
**Supplementary Material**  
Additional file 5.docx



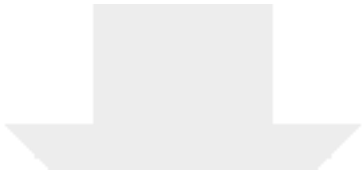

Click here to access/download  
**Supplementary Material**  
Additional file 6.docx





Click here to access/download  
**Supplementary Material**  
Additional file 7.pdf



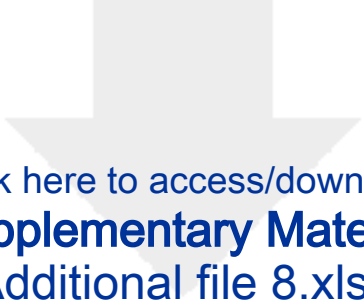

Click here to access/download  
**Supplementary Material**  
Additional file 8.xlsx



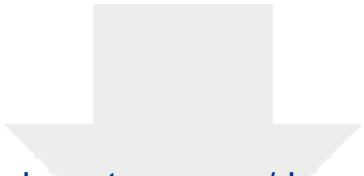

Click here to access/download  
**Supplementary Material**  
Additional file 9.docx



Supplement: giab021_giga-d-20-00244_original_submission.pdf [file giab021_giga-d-20-00244_original_submission.pdf]
