# Supplementary material for: Torix Rickettsia are widespread in arthropods and reflect a neglected symbiosis
Source: PubMed Central journal article supplement (PMC7992394; doi:10.1093/gigascience/giab021), 2021-03-25

|                                                      |                                                                                                                                                                                                                                                                                                                                                                                                                                                                                                                                                                                                                                                                                                                                                                                                                                                                                                                                                                                                                                                                                                                                                                                                                                                                                                                                                                                                                                                                                                                                                                                                                                                                                                                                                                                                                                                                                                                                                         |                      |
|------------------------------------------------------|---------------------------------------------------------------------------------------------------------------------------------------------------------------------------------------------------------------------------------------------------------------------------------------------------------------------------------------------------------------------------------------------------------------------------------------------------------------------------------------------------------------------------------------------------------------------------------------------------------------------------------------------------------------------------------------------------------------------------------------------------------------------------------------------------------------------------------------------------------------------------------------------------------------------------------------------------------------------------------------------------------------------------------------------------------------------------------------------------------------------------------------------------------------------------------------------------------------------------------------------------------------------------------------------------------------------------------------------------------------------------------------------------------------------------------------------------------------------------------------------------------------------------------------------------------------------------------------------------------------------------------------------------------------------------------------------------------------------------------------------------------------------------------------------------------------------------------------------------------------------------------------------------------------------------------------------------------|----------------------|
| <b>Manuscript Number:</b>                            | GIGA-D-20-00244R1                                                                                                                                                                                                                                                                                                                                                                                                                                                                                                                                                                                                                                                                                                                                                                                                                                                                                                                                                                                                                                                                                                                                                                                                                                                                                                                                                                                                                                                                                                                                                                                                                                                                                                                                                                                                                                                                                                                                       |                      |
| <b>Full Title:</b>                                   | Torix Rickettsia are widespread in arthropods and reflect a neglected symbiosis                                                                                                                                                                                                                                                                                                                                                                                                                                                                                                                                                                                                                                                                                                                                                                                                                                                                                                                                                                                                                                                                                                                                                                                                                                                                                                                                                                                                                                                                                                                                                                                                                                                                                                                                                                                                                                                                         |                      |
| <b>Article Type:</b>                                 | Research                                                                                                                                                                                                                                                                                                                                                                                                                                                                                                                                                                                                                                                                                                                                                                                                                                                                                                                                                                                                                                                                                                                                                                                                                                                                                                                                                                                                                                                                                                                                                                                                                                                                                                                                                                                                                                                                                                                                                |                      |
| <b>Funding Information:</b>                          | Biotechnology and Biological Sciences Research Council (BB/M011186/1)                                                                                                                                                                                                                                                                                                                                                                                                                                                                                                                                                                                                                                                                                                                                                                                                                                                                                                                                                                                                                                                                                                                                                                                                                                                                                                                                                                                                                                                                                                                                                                                                                                                                                                                                                                                                                                                                                   | Dr. Jack Pilgrim     |
|                                                      | Natural Environment Research Council (NE/L002450/1)                                                                                                                                                                                                                                                                                                                                                                                                                                                                                                                                                                                                                                                                                                                                                                                                                                                                                                                                                                                                                                                                                                                                                                                                                                                                                                                                                                                                                                                                                                                                                                                                                                                                                                                                                                                                                                                                                                     | Ms. Helen R. Davison |
| <b>Abstract:</b>                                     | <p><b>Background</b></p> <p>Rickettsia are intracellular bacteria best known as the causative agents of human and animal diseases. Although these medically important Rickettsia are often transmitted via haematophagous arthropods, other Rickettsia, such as those in the Torix group, appear to reside exclusively in invertebrates and protists with no secondary vertebrate host. Importantly, little is known about the diversity or host range of Torix group Rickettsia.</p> <p><b>Results</b></p> <p>This study describes the serendipitous discovery of Rickettsia amplicons in the Barcode of Life Data System (BOLD), a sequence database specifically designed for the curation of mtDNA barcodes. Out of 184,585 barcode sequences analysed, Rickettsia is observed in approximately 0.41% of barcode submissions and is more likely to be found than Wolbachia (0.17%). The Torix group of Rickettsia are shown to account for 95% of all unintended amplifications from the genus. A further targeted PCR screen of 1,612 individuals from 169 terrestrial and aquatic invertebrate species identified mostly Torix strains and supports the 'aquatic hot spot' hypothesis for Torix infection. Furthermore, the analysis of 1,341 Sequence Read Archive (SRA) deposits indicates Torix infections represent a significant proportion of all Rickettsia symbioses.</p> <p><b>Conclusions</b></p> <p>This study supports a previous hypothesis which suggests Torix Rickettsia are overrepresented in aquatic insects. In addition, multiple methods reveal further putative hot spots of Torix Rickettsia infection; including in phloem-feeding bugs, parasitoid wasps, spiders, and vectors of disease. The unknown host effects and transmission strategies of these endosymbionts make these newly discovered associations important to inform future directions of investigation involving the understudied Torix Rickettsia.</p> |                      |
| <b>Corresponding Author:</b>                         | Jack Pilgrim<br>University of Liverpool Institute of Infection Veterinary and Ecological Sciences<br>Neston, Cheshire, Liverpool UNITED KINGDOM                                                                                                                                                                                                                                                                                                                                                                                                                                                                                                                                                                                                                                                                                                                                                                                                                                                                                                                                                                                                                                                                                                                                                                                                                                                                                                                                                                                                                                                                                                                                                                                                                                                                                                                                                                                                         |                      |
| <b>Corresponding Author Secondary Information:</b>   |                                                                                                                                                                                                                                                                                                                                                                                                                                                                                                                                                                                                                                                                                                                                                                                                                                                                                                                                                                                                                                                                                                                                                                                                                                                                                                                                                                                                                                                                                                                                                                                                                                                                                                                                                                                                                                                                                                                                                         |                      |
| <b>Corresponding Author's Institution:</b>           | University of Liverpool Institute of Infection Veterinary and Ecological Sciences                                                                                                                                                                                                                                                                                                                                                                                                                                                                                                                                                                                                                                                                                                                                                                                                                                                                                                                                                                                                                                                                                                                                                                                                                                                                                                                                                                                                                                                                                                                                                                                                                                                                                                                                                                                                                                                                       |                      |
| <b>Corresponding Author's Secondary Institution:</b> |                                                                                                                                                                                                                                                                                                                                                                                                                                                                                                                                                                                                                                                                                                                                                                                                                                                                                                                                                                                                                                                                                                                                                                                                                                                                                                                                                                                                                                                                                                                                                                                                                                                                                                                                                                                                                                                                                                                                                         |                      |
| <b>First Author:</b>                                 | Jack Pilgrim                                                                                                                                                                                                                                                                                                                                                                                                                                                                                                                                                                                                                                                                                                                                                                                                                                                                                                                                                                                                                                                                                                                                                                                                                                                                                                                                                                                                                                                                                                                                                                                                                                                                                                                                                                                                                                                                                                                                            |                      |
| <b>First Author Secondary Information:</b>           |                                                                                                                                                                                                                                                                                                                                                                                                                                                                                                                                                                                                                                                                                                                                                                                                                                                                                                                                                                                                                                                                                                                                                                                                                                                                                                                                                                                                                                                                                                                                                                                                                                                                                                                                                                                                                                                                                                                                                         |                      |
| <b>Order of Authors:</b>                             | Jack Pilgrim                                                                                                                                                                                                                                                                                                                                                                                                                                                                                                                                                                                                                                                                                                                                                                                                                                                                                                                                                                                                                                                                                                                                                                                                                                                                                                                                                                                                                                                                                                                                                                                                                                                                                                                                                                                                                                                                                                                                            |                      |
|                                                      | Panupong Thongprem                                                                                                                                                                                                                                                                                                                                                                                                                                                                                                                                                                                                                                                                                                                                                                                                                                                                                                                                                                                                                                                                                                                                                                                                                                                                                                                                                                                                                                                                                                                                                                                                                                                                                                                                                                                                                                                                                                                                      |                      |
|                                                      | Helen R. Davison                                                                                                                                                                                                                                                                                                                                                                                                                                                                                                                                                                                                                                                                                                                                                                                                                                                                                                                                                                                                                                                                                                                                                                                                                                                                                                                                                                                                                                                                                                                                                                                                                                                                                                                                                                                                                                                                                                                                        |                      |

|                                                |                                                                                                                                                                                                                                                                                                                                                                                                                                                                                                                                                                                                                                                                                                                                                                                                                                                                                                                                                                                                                                                                                                                                                                                                                                                                                                                                                                                                                                                                                                                                                                                                                                                                                                                                                                                                                                                                                                                                                                                                                                                                                                                                                                                                                                                                                                                                                                                                                                                                                                                                                                                                                                                                                                                                                                                                                                                                                                                                                                        |
|------------------------------------------------|------------------------------------------------------------------------------------------------------------------------------------------------------------------------------------------------------------------------------------------------------------------------------------------------------------------------------------------------------------------------------------------------------------------------------------------------------------------------------------------------------------------------------------------------------------------------------------------------------------------------------------------------------------------------------------------------------------------------------------------------------------------------------------------------------------------------------------------------------------------------------------------------------------------------------------------------------------------------------------------------------------------------------------------------------------------------------------------------------------------------------------------------------------------------------------------------------------------------------------------------------------------------------------------------------------------------------------------------------------------------------------------------------------------------------------------------------------------------------------------------------------------------------------------------------------------------------------------------------------------------------------------------------------------------------------------------------------------------------------------------------------------------------------------------------------------------------------------------------------------------------------------------------------------------------------------------------------------------------------------------------------------------------------------------------------------------------------------------------------------------------------------------------------------------------------------------------------------------------------------------------------------------------------------------------------------------------------------------------------------------------------------------------------------------------------------------------------------------------------------------------------------------------------------------------------------------------------------------------------------------------------------------------------------------------------------------------------------------------------------------------------------------------------------------------------------------------------------------------------------------------------------------------------------------------------------------------------------------|
|                                                | Stefanos Siozios                                                                                                                                                                                                                                                                                                                                                                                                                                                                                                                                                                                                                                                                                                                                                                                                                                                                                                                                                                                                                                                                                                                                                                                                                                                                                                                                                                                                                                                                                                                                                                                                                                                                                                                                                                                                                                                                                                                                                                                                                                                                                                                                                                                                                                                                                                                                                                                                                                                                                                                                                                                                                                                                                                                                                                                                                                                                                                                                                       |
|                                                | Matthew Baylis                                                                                                                                                                                                                                                                                                                                                                                                                                                                                                                                                                                                                                                                                                                                                                                                                                                                                                                                                                                                                                                                                                                                                                                                                                                                                                                                                                                                                                                                                                                                                                                                                                                                                                                                                                                                                                                                                                                                                                                                                                                                                                                                                                                                                                                                                                                                                                                                                                                                                                                                                                                                                                                                                                                                                                                                                                                                                                                                                         |
|                                                | Evgeny V. Zakharov                                                                                                                                                                                                                                                                                                                                                                                                                                                                                                                                                                                                                                                                                                                                                                                                                                                                                                                                                                                                                                                                                                                                                                                                                                                                                                                                                                                                                                                                                                                                                                                                                                                                                                                                                                                                                                                                                                                                                                                                                                                                                                                                                                                                                                                                                                                                                                                                                                                                                                                                                                                                                                                                                                                                                                                                                                                                                                                                                     |
|                                                | Sujeevan Ratnasingham                                                                                                                                                                                                                                                                                                                                                                                                                                                                                                                                                                                                                                                                                                                                                                                                                                                                                                                                                                                                                                                                                                                                                                                                                                                                                                                                                                                                                                                                                                                                                                                                                                                                                                                                                                                                                                                                                                                                                                                                                                                                                                                                                                                                                                                                                                                                                                                                                                                                                                                                                                                                                                                                                                                                                                                                                                                                                                                                                  |
|                                                | Jeremy R. deWaard                                                                                                                                                                                                                                                                                                                                                                                                                                                                                                                                                                                                                                                                                                                                                                                                                                                                                                                                                                                                                                                                                                                                                                                                                                                                                                                                                                                                                                                                                                                                                                                                                                                                                                                                                                                                                                                                                                                                                                                                                                                                                                                                                                                                                                                                                                                                                                                                                                                                                                                                                                                                                                                                                                                                                                                                                                                                                                                                                      |
|                                                | Craig R. Macadam                                                                                                                                                                                                                                                                                                                                                                                                                                                                                                                                                                                                                                                                                                                                                                                                                                                                                                                                                                                                                                                                                                                                                                                                                                                                                                                                                                                                                                                                                                                                                                                                                                                                                                                                                                                                                                                                                                                                                                                                                                                                                                                                                                                                                                                                                                                                                                                                                                                                                                                                                                                                                                                                                                                                                                                                                                                                                                                                                       |
|                                                | M. Alex Smith                                                                                                                                                                                                                                                                                                                                                                                                                                                                                                                                                                                                                                                                                                                                                                                                                                                                                                                                                                                                                                                                                                                                                                                                                                                                                                                                                                                                                                                                                                                                                                                                                                                                                                                                                                                                                                                                                                                                                                                                                                                                                                                                                                                                                                                                                                                                                                                                                                                                                                                                                                                                                                                                                                                                                                                                                                                                                                                                                          |
|                                                | Gregory D. D. Hurst                                                                                                                                                                                                                                                                                                                                                                                                                                                                                                                                                                                                                                                                                                                                                                                                                                                                                                                                                                                                                                                                                                                                                                                                                                                                                                                                                                                                                                                                                                                                                                                                                                                                                                                                                                                                                                                                                                                                                                                                                                                                                                                                                                                                                                                                                                                                                                                                                                                                                                                                                                                                                                                                                                                                                                                                                                                                                                                                                    |
| <b>Order of Authors Secondary Information:</b> |                                                                                                                                                                                                                                                                                                                                                                                                                                                                                                                                                                                                                                                                                                                                                                                                                                                                                                                                                                                                                                                                                                                                                                                                                                                                                                                                                                                                                                                                                                                                                                                                                                                                                                                                                                                                                                                                                                                                                                                                                                                                                                                                                                                                                                                                                                                                                                                                                                                                                                                                                                                                                                                                                                                                                                                                                                                                                                                                                                        |
| <b>Response to Reviewers:</b>                  | <p>Dear Dr. Edmunds,</p> <p>Thank you for considering a revised version of “Torix Rickettsia are widespread in arthropods and reflect a neglected symbiosis”. The authors would like to thank the three reviewers for their time and comments on the manuscript. Please find below a point-by-point response to reviewer comments. Aside from clarificatory points, the major changes to the manuscript include:</p> <ul style="list-style-type: none"> <li>•The attempted retrieval of both parasitoid and protist reads from the SRA datasets to ascertain the likelihood of these taxa being responsible for the Rickettsia positives observed in the study.</li> <li>•The additional analytical step of using the Kaiju bioinformatic tool to confirm COI sequences from the BOLD dataset as being bacterial.</li> <li>•A more detailed analysis of comparing the presence of Torix Rickettsia in aquatic and terrestrial biomes.</li> <li>•The inclusion of phylograms for figures 2 and 3 to avoid confusion over long branch attractions.</li> </ul> <p>Reviewer#1</p> <p>My only concern is that Torix group Rickettsia and their relatives have also been identified in protists, such as nuclearioid amoebae. So I wonder how many of these Rickettsia, particularly in aquatic hosts, are symbionts of protists residing in animal guts. Have the authors tried to pull out protist 18S sequences from the SRA datasets (or tried to amplify protist genes via PCR, although that would be much more difficult)?</p> <p>We thank the reviewer for this insight which we agree with. phyloFlash analysis retrieved 16S (microbe) and 18S (eukaryote) sequences for each SRA dataset where present, and we have now included this information on the FTP server under the directory name “phyloFlash.html files”. One instance of an assembled parasitoid 18S rRNA sequence was found in dataset ID SRR6313831 from Bemisia tabaci. However, a B. tabaci-Rickettsia true endosymbiosis has already been confirmed through FISH imaging (Wang et al. 2020; doi:10.1111/1462-2920.14927) suggesting the parasitoid is likely not responsible for the presence of Rickettsia in this case.</p> <p>Protist sequences were also identified in some of the SRA datasets but these were a significant minority of reads compared to Rickettsia reads (doi:10.6084/m9.figshare.12801140). Intriguingly, one of the highest numbers of protist reads came from our previous study (SRA dataset SRR5298327) which was shown by FISH to be a true endosymbiosis between insect and Rickettsia (Pilgrim et al. 2017; doi:10.1111/1462-2920.13887). Overall, these data suggest that detecting contamination from Rickettsia-infected protists or parasitoids is uncommon. This new information has been added on lines 274-281, 355-364 and 576-578.</p> <p>Minor comments:</p> <p>Line 194 - Psyllidae spelling</p> <p>Line 242 &amp; Table 2 - Chaoboridae spelling</p> |

Line 251 - Simulium spelling

Spellings of these taxa have been now rectified.

Lines 340 - I would replace refs 49 and 50 with Gehrer & Vorburger, Biol. Lett., 2012

The references have now been changed per the reviewer's suggestion.

Line 362 - this sentence is confusing because the citations refer to Rickettsia in the belli group

For clarity the sentence has been changed to specify the references refer to the belli group only (line 417).

Table 2 - Siphonaptera spelling

Line 819 - Parentheses spelling

These spellings have now been changed.

Reviewer#2

Abstract 38, 42-43: the introduction of the "aquatic hotspot" hypothesis and that the results were supporting this hypothesis was very appealing (l38), yet this was not addressed in the conclusion, which instead claimed that Rickettsia was associated with a number of habits (l42-43). As these habits were not linked to aquatic, and not introduced previously in the background, the logic flow here is rather difficult to follow.

We thank the reviewer for flagging this. We have now changed the conclusion of the abstract to show that new hotspots of infection were revealed as well as confirming a bias towards aquatic insects (lines 44-47).

69: Rickettsia has been estimated as being present in 20-24% of species. One would be very interested in learning whether this is confirmed/disapproved by the findings of the current study. Which part of the experimental design is set to answer this question? If no, what needs to be done to get a better idea?

The 20-42% prevalence figure for terrestrial arthropod species is derived from model-based estimation techniques which assume populations infected have a minimum of 1/1000 individuals infected. Thus, our figure of ~9% from the targeted PCR screen is likely lower due to small within-species sample sizes. This has been highlighted in lines 366-370.

79-88: It might be a good idea to add something here about the diversity of subgroups of Torix. The results later on revealed two subgroups (Leech and Limoniae), but are these good representatives of the diversity within Torix? How many subgroups are already known?

Previous studies on Torix Rickettsia have highlighted two subgroups: "Leech" and "Limoniae". This was initially based on limited phylogenetic markers but by extension of using multiple markers we confirm in this study that a majority of Torix strains fall into these two subgroups. We have highlighted this on line 85.

90-102: The use of terms Rickettsia CoxA, COI, Rickettsia COI are confusing. If Rickettsia CoxA and Rickettsia COI are actually referring to the same Rickettsia gene,

the term needs to be standardized.

We thank the reviewer for making this point. We agree that terms should be standardised as much as possible. Therefore, we have removed any reference to 'CoxA' in the manuscript.

106: does the "template" here refer to DNA extract/aliquot? "Template" in the context of DNA template is primarily used in the description of amplification reaction, which doesn't seem to be the case here. This term is somewhat confusing. As you used "DNA extract" later in the text, I would suggest that these terms be unified.

The term "template" has been swapped for "DNA extract" throughout the manuscript.

109: "function more broadly" here is also vague. Do you mean that the primers used in these PCR assays are more degenerate or specifically designed to target Rickettsia genes? Please clarify.

The primers function more broadly as they were designed from our previous work based on Rickettsia genomes from multiple clades, including the first available Torix genome. This information has been removed from the introduction and is instead clarified in the data description (lines 153-155) and methods (lines 478-480).

123-125: "...deemed as contaminant sequences as a result of not matching initial morphotaxa assignment". I don't think that this is entirely accurate. A significant proportion of barcodes in BOLD are not matching initial morphotaxa assignment, at varied taxonomic levels. These include mis-identification, ambiguous/unstable taxonomic status, lab contaminations, etc. I would assume that BOLD uses an algorithm to confirm the sequence as being contaminants, only when they are matched to the most common non-target contaminants, e.g., bacteria, human etc.

We thank the reviewer for their comment. Yes, this dataset contained both contaminant sequences, as well as misidentified taxa and we have now changed the wording of this sentence to reflect this on line 130-132 and in Figure 1. Information on how contaminants were confirmed as bacterial are also now described in lines 450-465.

125-128: the term "specimens" needs to be clarified. Do these include those that didn't yield a DNA sequence?

Yes-this included some specimens where barcoding had failed to yield a DNA sequence. This has now been clarified on line 126.

142: Explain targeted PCR Rickettsia screen. Does it employ specific primer sets designed for Rickettsia? Although this was described in the method section, a brief explaining of the method would help the readers to understand the context.

Yes, as mentioned above, the primers function more broadly as they were designed from our previous work based on Rickettsia genomes from multiple clades and including the first available Torix genome. This has now been clarified in lines 153-155 and 478-480.

149: Should "Analyses" be "Results"?

The formatting of gigaScience uses "analyses" in place of "results".

160-161: "further unique bacteria contaminants were also detected", where are these results? Please cite.

These results have now been added in Additional file 1 (graphic representation of taxonomic classification as bacteria) and the FTP server file "Kaiju\_misc\_bacteria\_detection" (sequence information). These were sequences flagged as bacterial by the bioinformatics tool Kaiju (lines 173-176).

167-170 : if the BOLD results does not seem to support the aquatic hotspot theory, why?

Both the BOLD and SRA datasets have inherent biases which make them unsuitable to assess whether Torix Rickettsia are more common in aquatic or terrestrial biomes. For example, most SRA submissions are from lab-reared terrestrial insects. Likewise, a majority of the specimens from BOLD containing Rickettsia have limited taxonomic/ecological information, by virtue of not returning an mtDNA COI sequence. Therefore, a PCR-based study targeting both terrestrial and aquatic taxa was implemented in order to specifically test this 'aquatic hot spot hypothesis' (lines 149-158).

170-172: the predominance report of Rickettsia from Canada seems meaningless, given the strongly biased sampling in BOLD (supplementary Fig. 1)

The authors agree. This has now been removed.

180: this is confusing, does it mean that the Torix sequence is identical to that of C\_LepFolR at the 3' end? Or does it have a SNP but different from that of other bacteria?

The Torix sequence has a SNP at the same site as all the other Wolbachia/Rickettsia genomes compared to C\_LepFolR at the 3' end. However, all the Wolbachia/Rickettsia genomes assessed apart from the Torix Rickettsia have a SNP at the 3' priming end for C\_LepFolF. For clarity, this can be viewed in Additional file 4.

185: How were these 186 Rickettsia-containing samples selected from 753 samples?

These DNA extracts were chosen based on assorted geographic location, host order and diverse phylogenetic placement. This has been clarified on line 196-198.

192: So how many subgroups of Torix are known? How well the findings represent the diversity?

As noted in a previous reply, to date only two subgroups of Torix Rickettsia have been uncovered: "Leech" and "Limoniae". This was initially based on limited phylogenetic markers but by extension of using multiple markers we confirm in this study that a majority of Torix strains fall into these two subgroups. We have highlighted this on line 85.

207: define attempted barcodes

In this context, an "attempted barcode" is an attempt to retrieve a mtDNA COI barcode from the approximately 185,000 arthropods in the study. As mentioned above and indicated in figure 1, not all DNA extracts produced a COI sequence to interpret. Now that the term "specimen" has been clarified on line 126 we have replaced "attempted barcodes" with "specimens" to avoid confusion.

211: Here you used "genomic extracts", is this equivalent to "template"? Try to standardize terms.

We have standardised terms to only "DNA extracts" throughout the manuscript.

217: again, why BOLD taxa with the most presence of Rickettsia NOT associated with aquatic lifestyle?

233-235: why did the comparison between aquatic/terrestrial arthropods only consider the targeted Rickettsia screen results, NOT that of SRA search?

We refer the reviewer back to our earlier response (167-170) to address both of these points.

269-270: This is somewhat misleading. This might imply that these two groups of bacteria cooccur in the same organisms, and the amplification of R is easier than W. I don't think the current experimental design is able to proof or deny this possibility.

The wording has now been changed on lines 310-312 to avoid this confusion.

308-310: we know that there are many other possibilities that might cause barcoding failure. At least provide some alternative causes to avoid biased argument.

We have deleted this argument from the paragraph.

415-416: what are the exact criteria when choosing these DNA templates?

This point has been addressed above (reviewer comment 185)

428: does "linear" mean non-recombined sequence?

In this context, "linear" refers to a parameter of the recombination detection program which refers to the sequences not being circular.

438-439: does this mean that the hosts were NOT identifiable by morphology?

That is correct, the metadata provided for specimens before barcoding is a general morphological classification usually down to the order level. Subsequently, more refined classification can only be achieved from the mtDNA barcode. This has been highlighted on lines 501-504.

459-461: What if the sequence was matched to more than one barcode at >98% identity?

This did not occur.

489-497: Please provide more details on the analysis of phyloFlash, e.g., parameters used. I am a bit concerned about the assembling process employed here. 16S assembling can be difficult/impossible when metagenomics data contain more than 1 bacterial species or multiple variable copies of 16S, both of which might be the case for Rickettsia.

Default parameters were used for phyloFlash (lines 567-578). Phyloflash uses a combination of SPAdes and BBmap to assemble rRNA SSU and references a curated database (SILVA). BBmap cut off for identification is a minimum identity >70% and phyloflash recommends SPAdes as the best method for cases where there may be a lack of close relatives in the reference database. The recent paper (Gruber-Vodika et al. 2020; doi:10.1128/mSystems.00920-20) goes into further details about chimeras, false positives and dataset preparation. While the defaults do what they can to minimise risk of false positives, it cannot be entirely eliminated.

We have attempted to address this by flagging the instances where Wolbachia sequences or other symbionts were also found in the phyloflash notes, though these sequences were not always assembled. This information can be seen in the phyloflash html files on the FTP server.

Table 1: for species without a definite identification to the species level (e.g., Pachycrepoideus sp.), do we know that all specimens analyzed here actually belong to the same species? I assume this can be confirmed using barcodes.

Some arthropods without a definite identification were referred to as "sp." because barcoding was not successful or did not match any known species in the database (lines 546-547).

Figure legends for Figs. 2 and 3: the term "No colour" is misleading. I thought these would refer to those without any background colors (e.g., Rickettsia lineage in Fig. 2).

We have removed the term "no colour" from the legend.

Fig. 2: So all Rickettsia in this tree were not from non-BOLD reference (says the Fig legend)? If the number in parenthesis represent the number of sequences, why is there only a single tip for Rickettsia? Are they collapsed? If yes, does it mean that the genetic divergence within Rickettsia is much smaller than that within Wolbachia?

Yes, Rickettsia is collapsed and this is now mentioned in the legend (Line 890). Genetic divergence of Rickettsia is deliberately shown in Figure 3 (and Additional file 2) and not in Figure 2 for ease of presentation, due to the number of taxa in the phylogenies.

Fig. 5: Is the lineage distribution associated with methodology used in discovering these sequences (SRA vs. targeted PCR screening)? Provide statistics.

The SRA datasets contain more Belli strains than the targeted screen but this seems irrelevant information as both datasets cannot be reasonably compared. As mentioned above, the SRA dataset contain very few aquatic insects with most depositions deriving from terrestrial insects and/or lab cultivated insects. In contrast, the targeted screen represents mostly wild-caught insects with a mixture of aquatic and terrestrial arthropods. Subsequently, even if it was shown that specific lineages were associated with the two methods for the SRA and targeted screens, it is just a likely that this is due to sampling bias rather than other methodological biases. Thus, our conclusions are measured

- 1)The BOLD screen demonstrates that Rickettsia (specifically from the Torix group) are overrepresented in barcoding projects and can help identify new hosts.
- 2)The SRA screen demonstrates that both Torix and Belli clades of Rickettsia are common.
- 3)The targeted screen provides evidence to suggest Torix Rickettsia are more common in aquatic insects.

Fig. 6: Move the vertical bars representing Typhus, Transitional, Spotted fever, and Bellii, further to the right so that they are in line with that of Torix. My understanding is that these lineages belong to the same hierarchic level under Rickettsia.

We thank the reviewer for pointing this out and have changed figure 6 accordingly.

#### Reviewer #3

This study relies heavily on secondary data usage, identifying the presence of Rickettsia symbionts in host samples using discarded data from the BOLD database. This is great, and we should have more studies like this. However, largely, the authors fail to discuss the limitations of their study which comes from secondary data usage. For example, lack of control for cross-contamination of samples, the fact that there may be incomplete taxa sampling, and other biases in the underlying database used. For example, they failed to do a comprehensive analysis looking for batch effects to ensure that samples were not systematically contaminated in data deposited from one organization.

We thank the reviewer for highlighting this. Although this study does use secondary data in the BOLD and SRA screens, our own primary dataset was generated via the targeted screen to prevent an overreliance on secondary data and of course its biases. Regarding the prospect of cross-contamination, this is unlikely for two reasons.

- 1)A majority of the multilocus profiles assessed from BOLD tend to give unique profiles which is reflected in our phylogenetic trees. Significant cross-contamination would tend to give identical strains.
- 2)If cross-contamination occurred between DNA extracts then it is likely that an mtDNA COI sequence would be retrieved (either from the original DNA extract or the contaminating one) rather than a Rickettsia COI sequence, as mtDNA is far more likely to amplify than Rickettsia when in competition.

Additionally, due to the aforementioned biases of using secondary data we have tried to be measured in our conclusions as a result of this. Specifically, we are not trying to claim that the Rickettsia sequences discovered in these databases are completely representative of Torix hosts in nature. Merely, that they allow for the discovery of new putative hosts and through combining several methods there is an indication that Torix Rickettsia are more widespread than previously thought and are overrepresented in aquatic insects.



I also have significant concerns over the lack of detail in the methods and not having access to the multiple sequence alignment used.

Sequence alignments, tree files etc. should already be available to the reviewer via the data management team (in the FTP server) at the journal. If this is not the case, we are happy to reupload the relevant data.

Other concerns/criticisms I had, include:

There are no methods for how samples were binned in Figure 1 either in the manuscript or in the figure. For example, how were bacteria contaminants v. non-bacteria contaminants determined? Was it a BLAST search. If so, what were the criteria? I suspect based on results presented Figures 2 and 3 that the criteria were not stringent enough.

BOLD compares COI sequences to common contaminants (e.g. human, bacteria) using BLAST-details can be found in Ratnasingham and Hebert, 2007 (doi:10.1111/j.1471-8286.2007.01678.x). The designation of bacterial contaminants by BOLD, from the dataset containing 3,817 non-target sequences, was confirmed by the taxonomic classification program, Kaiju, using default parameters. We took the sequences provisionally identified as bacterial before placing them phylogenetically with reference bacteria suggested by Kaiju. This has been highlighted in lines 450-465.

Line 154: Phylogenetic placement does not demonstrate these are of microbial origin. If I put a random sequence into the multiple sequence alignment, it would align and it would be in the phylogeny, by nature of the methods. Nothing about the tree or the topology suggests that didn't happen. In fact, some of the long branches may indicate that it did.

We have now included the usage of Kaiju which is a software program designed to designate taxonomic classification of sequences. For all sequences in the alignment used to create Figure 2, these were all identified as bacteria except one erroneously identified as eukaryotic which was later identified as Rickettsia on our phylogeny. Kaiju also allowed us to choose more specific reference sequences to include in our phylogenies. Aside from Rickettsia and Wolbachia, a significant minority of sequences formed a monophyletic clade with the order Legionellales. In addition, we have now also included mitochondria in the tree on figure 2 to further verify the sequences are bacterial. This is discussed in lines 163-168 and 450-465.

With regards to long branches being problematic, Figures 2 and 3 were constructed as cladograms and not phylograms for neat presentation: branch lengths tell us nothing about clade designation. For transparency we have now included phylograms of figures 2 and 3 in Additional file 2 which demonstrate no long branches.

Since COI is derived from the mitochondrial genome, which is a microbe, language about "microbial origin" needs to be fixed throughout. Many consider organelles to still be microbes. If nothing else, their sequences (including COI) are of microbial origin.

We thank the reviewer for noting this. "Microbial origin" references have now been removed and we now refer to "bacteria" to distinguish from mitochondria throughout the manuscript.

The letters mean in Figure 2 are supposed to be the Wolbachia supergroups. But their placement seems quasi random. The sequences don't appear to be assigned to supergroups. If their placement corresponds to representative sequences, please specify that is the case, and make clear what the representative sequences are, and where they are on the tree.

The supergroup letters are for individual sequences. This has now been noted in the figure 2's legend with accession details for sequences also clarified as being available in additional file 10.

Regardless, the phylogeny shows issues with very long branches around "A" from



around 7 o'clock to 9 o'clock if the phylogeny were a 12-hour clock. This is peculiar. Is this an artifact of the tree rendering? Or the outgroup selection? Or some other problem—like the presence of Wolbachia lateral gene transfers that are no longer under selection? Or were sequences included in the analysis that aren't really from bacteria and is a methodological artifact?

As mentioned above, branch lengths do not say anything about genetic distance on cladograms. We have included phylograms in Additional file 2 for transparency and to show a lack of long branches within clades.

In general, there is no discussion or acknowledgement of the extensive literature on bacterial DNA integrations in host genomes, which for Wolbachia is extensive.

This has now been addressed in lines 352-355.

How much support is there for branches/nodes in the tree? I can see bootstrapping in the methods, but I don't see any indication of bootstrap support.

Bootstrapping is present on all trees in this manuscript and graphically represented as black, white and grey circles in figures 2, 3, 4 and 5 and coloured circles in 6. This is indicated in the top left corner of all figures.

The multiple sequence alignment and unmodified phylogenetic files need to be made available to the reviewers and the readers either as online supplementary material or in a public repository with a permanent DOI.

As mentioned above, all of these files should already be available to reviewers via the FTP server of the journal.

Line 215-227, using the term prevalence is not correct. You do not know the full extent of prevalence of any of these organisms since you weren't targeting them with more specific primers with rigorous sampling. It is easy for this to be misconstrued and alternate terminology is needed.

"Prevalence" has now been changed to "frequency" throughout the manuscript when referring to the proportion of Rickettsia and Wolbachia deposits within the BOLD dataset.

Line 224: "indicating". There are other explanations as well, so I think using the word "suggesting" is more appropriate.

This has now been changed accordingly.

Line 235: The statement is too definitive for the data used. Yes, the stated p-value may be significant, but the statement and conclusions do not take into account the significant sampling bias in the SRA. But in addition, when I do the Fisher's Exact test I get 0.0550, which is not significant. The methods for the Fisher's Exact test and summary of the matrix is missing. My two by two matrix that yields a p-value of 0.0550 used presence/absence in the taxa in the table:

|                      | Aquatic | Terrestrial |
|----------------------|---------|-------------|
| Has Torix Rickettsia | 9       | 7           |
| Does not have        | 49      | 107         |

Intuitively it isn't surprising it wouldn't be significant the difference is 20% v. 10% with more limited sampling of one than the other and low levels of detection overall.

We appreciate the reviewer's diligence in checking the Fisher's Exact test. However, the matrix presented by the reviewer does not consider Rickettsia subgroup and fails to account for multiple rows containing the same species (be it from a different population).

Subsequently, when taking these factors into account this is the matrix which was used in the submitted manuscript.

|                      | Aquatic | Terrestrial |
|----------------------|---------|-------------|
| Has Torix Rickettsia | 9       | 5           |
| Does not have        | 49      | 106         |

Note that only 5 Torix Rickettsia are present in this matrix for terrestrial species because 2 of the 7 Rickettsia positive strains from the terrestrial species are not from the Torix group.

Since submission of the initial manuscript, table 1 has been updated to reflect previously missing Rickettsia positives detected in 3 spiders. With the addition of these spider positives, there is no significant difference between aquatic taxa and terrestrial taxa ( $p=0.1038$ ).

However, when considering insects alone, this results in a p value of 0.0131. When controlled for taxonomic group (not all insect orders are represented in terrestrial and aquatic pools) the p value is still significant at 0.025. Subsequently, we have now suggested that the aquatic hotspot for Torix Rickettsia appears to apply for insects but not invertebrates in general. It should also be noted that the within-species sample sizes of terrestrial taxa in this study are often greater than aquatic suggesting that p values are conservative (positives are more likely to be found with greater sample sizes).

Details of Fisher's exact analyses have now been included in Additional file 7 and discussed in lines 245-261 and 554-564.

Line 300-301: what was the minimum criteria to say that a taxa has it? Merely a COI sequence? Or more? It seems given cross contamination of sequencing projects and other issues, that you need more than just the COI sequence in the BOLD database. Making it clear here is important to the discussion and interpretation of results.

The issue of cross-contamination has been addressed in our first response to the reviewer. Of course, ideally to confirm a true endosymbiosis, direct visualisation of the symbiont in the host's tissues is needed due to potential for the bacteria to come from ingested food or parasitism. However, previous studies have predominantly relied solely on PCR to identify putative hosts (as demonstrated in Table 2). To reflect this, we have changed the language accordingly to mention "putative hosts" where appropriate (lines 287, 296, 342, 389, 427). Additionally, we direct the reviewer to our response to reviewer 1, where we have screened SRA datasets to assess how likely contamination from ingested biota and parasitism is. Rickettsia-insertions into the host nuclear genome is also unlikely because all protein-coding genes from this study showed no signs of a frameshift, suggesting a lack of pseudogenization. Further, there are no well supported cases of Rickettsia inserts in the nuclear genome in the literature to date, a marked contrast to Wolbachia.

We agree with the reviewer that these points are important for the interpretation of the results and now mention them in lines 337-350

Line 310: I'm not sure I agree with your logic. It might be that they fail because of Rickettsia or other bacterial DNA replication.

This argument has been removed from the paragraph.

Line 329: these conclusions seem premature given the data presented, since bootstrap support values or missing in this version reviewed.

We refer the reviewer to our previous response to bootstrapping.

Please check the legends in the additional files. I think Additional File 3 has a legend stating it is "Additional File 2". Likewise Additional File 2 has a legend stating it is "Additional File 1"

We thank the reviewer for flagging this. We have changed the legends accordingly.

**Additional Information:**

| Question                                                                                                                                                                                                                                                                                                                                                                                                                                                                                                                            | Response   |
|-------------------------------------------------------------------------------------------------------------------------------------------------------------------------------------------------------------------------------------------------------------------------------------------------------------------------------------------------------------------------------------------------------------------------------------------------------------------------------------------------------------------------------------|------------|
| <p>Are you submitting this manuscript to a special series or article collection?</p>                                                                                                                                                                                                                                                                                                                                                                                                                                                | <p>No</p>  |
| <p><b>Experimental design and statistics</b></p> <p>Full details of the experimental design and statistical methods used should be given in the Methods section, as detailed in our <a href="#">Minimum Standards Reporting Checklist</a>. Information essential to interpreting the data presented should be made available in the figure legends.</p> <p>Have you included all the information requested in your manuscript?</p>                                                                                                  | <p>Yes</p> |
| <p><b>Resources</b></p> <p>A description of all resources used, including antibodies, cell lines, animals and software tools, with enough information to allow them to be uniquely identified, should be included in the Methods section. Authors are strongly encouraged to cite <a href="#">Research Resource Identifiers</a> (RRIDs) for antibodies, model organisms and tools, where possible.</p> <p>Have you included the information requested as detailed in our <a href="#">Minimum Standards Reporting Checklist</a>?</p> | <p>Yes</p> |
| <p><b>Availability of data and materials</b></p> <p>All datasets and code on which the conclusions of the paper rely must be either included in your submission or deposited in <a href="#">publicly available repositories</a> (where available and ethically appropriate), referencing such data using a unique identifier in the references and in the “Availability of Data and Materials” section of your manuscript.</p>                                                                                                      | <p>Yes</p> |

Have you have met the above requirement as detailed in our [Minimum Standards Reporting Checklist?](#)



24 CRM: [craig.macadam@buglife.org.uk](mailto:craig.macadam@buglife.org.uk)

25 MAS: [salex@uoguelph.ca](mailto:salex@uoguelph.ca)

26 GDDH: [ghurst@liverpool.ac.uk](mailto:ghurst@liverpool.ac.uk)

27

## 28 **Abstract**

29 **Background:** *Rickettsia* are intracellular bacteria best known as the causative agents of human  
30 and animal diseases. Although these medically important *Rickettsia* are often transmitted via  
31 haematophagous arthropods, other *Rickettsia*, such as those in the Torix group, appear to  
32 reside exclusively in invertebrates and protists with no secondary vertebrate host.  
33 Importantly, little is known about the diversity or host range of Torix group *Rickettsia*.

34 **Results:** This study describes the serendipitous discovery of *Rickettsia* amplicons in the  
35 Barcode of Life Data System (BOLD), a sequence database specifically designed for the  
36 curation of mtDNA barcodes. Out of 184,585 barcode sequences analysed, *Rickettsia* is  
37 observed in approximately 0.41% of barcode submissions and is more likely to be found than  
38 *Wolbachia* (0.17%). The Torix group of *Rickettsia* are shown to account for 95% of all  
39 unintended amplifications from the genus. A further targeted PCR screen of 1,612 individuals  
40 from 169 terrestrial and aquatic invertebrate species identified mostly Torix strains and  
41 supports the 'aquatic hot spot' hypothesis for Torix infection. Furthermore, the analysis of  
42 1,341 Sequence Read Archive (SRA) deposits indicates Torix infections represent a significant  
43 proportion of all *Rickettsia* symbioses.

44 **Conclusions:** This study supports a previous hypothesis which suggests Torix *Rickettsia* are  
45 overrepresented in aquatic insects. In addition, multiple methods reveal further putative hot  
46 spots of Torix *Rickettsia* infection; including in phloem-feeding bugs, parasitoid wasps, spiders,  
47 and vectors of disease. The unknown host effects and transmission strategies of these  
48 endosymbionts make these newly discovered associations important to inform future  
49 directions of investigation involving the understudied Torix *Rickettsia*.

50 **Keywords:** *Rickettsia*; symbiosis: arthropods; endosymbiont; DNA barcoding



## 51 **Background**

52 It is now widely recognized that animals live in a microbial world, and that many aspects of  
53 animal biology, ecology and evolution are a product of their symbioses with microorganisms  
54 [1]. In invertebrates, these symbioses may be particularly intimate, and involve transmission  
55 of the microbe from parent to offspring [2]. The alignment of host reproduction with symbiont  
56 transmission produces a correlation between the fitness interests of the parties, reflected in  
57 symbionts evolving to play a number of physiological roles within the host, from defence [3,4]  
58 through to core anabolic and digestive functions [5,6]. However, the maternal inheritance of  
59 these microbes has led to the retention of parasitic phenotypes associated with distortion of  
60 reproduction, with symbiont phenotypes including biases towards daughter production and  
61 cytoplasmic incompatibility [7]. These diverse individual impacts alter the ecology and  
62 evolution of the host, in terms of diet, dynamics of interaction with natural enemies, sexual  
63 selection and speciation.

64

65 Heritable symbioses have evolved on multiple occasions amongst microbial taxa. In some  
66 cases, the microbial lineage is limited to a single clade of related animal hosts, such as  
67 *Buchnera* in aphids [8]. In other cases, particular heritable microbes are found across a wide  
68 range of arthropod species. *Wolbachia* represents the most common associate, considered to  
69 infect nearly half of all species [9], and this commonness is a function in part of the ability of  
70 *Wolbachia* to transfer to a broad range of new host species and spread within them (host shift  
71 events) [10]. Aside *Wolbachia*, other microbes are found commonly as heritable symbionts of  
72 arthropod hosts [11]. *Cardinium* and *Rickettsia*, for instance, have been estimated at being  
73 present in 13-55% and 20-42% of terrestrial arthropod species respectively [12].

74

75 In this paper, we address the diversity and commonness of symbioses between *Rickettsia* and  
76 arthropods. The *Rickettsia* have increasingly been recognized as a genus of bacteria with  
77 diverse interactions with arthropods [13,14]. First discovered as the agents underlying several  
78 diseases of humans vectored by haematophagous arthropods [15,16], our understanding of  
79 the group changed in the 1990s with the recognition that *Rickettsia* were commonly  
80 arthropod symbionts [17,18]. *Rickettsia* were recognized first as male-killing reproductive  
81 parasites [17,19] and then later as beneficial partners [3,20,21].

82

83 Following this extension of our understanding of *Rickettsia*-arthropod interactions, a new  
84 clade of *Rickettsia* was discovered from work in *Torix* leeches [22,23]. This clade was sister to  
85 all other *Rickettsia* genera and contained two subgroups (Leech and Limoniae [24]), with no  
86 evidence to date of any strain having a vertebrate pathogen phase. The host range for *Torix*  
87 *Rickettsia* is broader than that for other members of the genus, going beyond arthropods to  
88 include amoeba hosts [25,26]. Targeted PCR based screening have revealed *Torix* group  
89 *Rickettsia* as particularly common in three groups with aquatic association: *Culicoides* biting  
90 midges, deronectid beetles and odonates [24,27,28]. However, some previous hypothesis-  
91 free PCR screens that aimed to detect *Rickettsia* in arthropods have likely missed these  
92 symbioses, due to divergence of the marker sequence and mismatch with the primers [29].

93

94 During our previous work on *Torix Rickettsia* in biting midges [27], we became aware of the  
95 presence of *Rickettsia* cytochrome *c* oxidase I (*COI*) sequences deposited in GenBank that  
96 derived from studies where the intended target of amplification/sequencing was

97 mitochondrial *COI*. These deposits derived from studies using mtDNA barcoding for  
98 phylogeographic inference [30], or in barcoding based species identification approaches  
99 [31,32]. Non-target amplification of *Rickettsia COI* using mitochondrial *COI* barcoding primers  
100 has been reported in spiders [31,32] and freshwater amphipods [30,33]. Furthermore, we  
101 have noted two cases in our lab where amplicons obtained for mtDNA barcoding of an  
102 arthropod have, on sequence analysis, revealed *Rickettsia COI* amplification (Belli group  
103 *Rickettsia* from Collembola, and Torix group *Rickettsia* from *Cimex lectularius* bedbugs).  
104 Previous work had established barcoding approaches may amplify *COI* from *Wolbachia*  
105 symbionts [34], and the data above indicated that non-target *Rickettsia COI* may be likewise  
106 amplified during this PCR amplification for mitochondrial *COI*.

107

108 In this paper, we use three approaches to reveal the diversity and commonness of Torix  
109 *Rickettsia* in arthropods. First, we probed a bin from the Barcode of Life Data System (BOLD  
110 [35]), containing non-target *COI* sequences, for *Rickettsia* amplicons and then used the DNA  
111 extracts from these projects to define the diversity of *Rickettsia* observed using a multilocus  
112 approach. Second, we screened DNA extracts from multiple individuals from 169 invertebrate  
113 species for *Rickettsia* presence to determine the distribution of the symbiont in both  
114 terrestrial and aquatic biomes. Finally, we used bioinformatic approaches to examine the  
115 Sequence Read Archive (SRA) depositions for one individual from 1,341 arthropod species for  
116 the presence of *Rickettsia* and used this as a means of estimating the relative balance of Torix  
117 group to other *Rickettsia* within symbioses.

118

119

## 120 **Data Description**

### 121 *Barcode of Life Data System (BOLD)*

122 While searching the Barcode of Life Data System (BOLD), a depository of >8 million *COI* mtDNA  
123 sequences, hundreds of hits were observed with high sequence similarity to Torix group  
124 *Rickettsia*. To investigate the diversity and host distribution of these non-target amplicons,  
125 access was permitted to analyse *COI* barcoding data deriving from a BOLD screening project  
126 totaling 184,585 arthropod specimens (including individuals where barcoding had failed) from  
127 21 countries and collected between 2010 and 2014. *COI* sequences provided by BOLD were  
128 generally derived from DNA extracts created from somatic tissues (legs are often used in order  
129 to retain most of the specimen for further analyses if necessary), but also rarely included  
130 abdominal tissues. The first dataset made available [36] included 3,817 specimens containing  
131 sequences not matching initial morphological assignment (and likely to contain contaminant  
132 sequences). The second dataset included 55,366 specimens judged to not contain non-target  
133 amplicons [37]. A remaining 125,402 specimens were not made available, and the 55,366  
134 subsample was used as a representative sample from which the contaminants had originated  
135 (Figure 1). The protocols for data collection, data curation and quality control of submitted  
136 BOLD samples is described by Ratnasingham & Hebert [38].

137

### 138 *Sequence Read Archive (SRA)*

139 Further insights into the balance of *Rickettsia* groups within arthropod symbioses were  
140 obtained through searching for *Rickettsia* presence in Illumina datasets associated with  
141 arthropod whole genome sequence (WGS) projects in the SRA (60,409 records as of the 20th  
142 May 2019). To reduce the bias from over-represented laboratory model species (e.g.

143 *Drosophila* spp., *Anopheles* spp.) a single dataset per species was examined, and where  
144 multiple data sets existed for a species, that with the largest read count was retained. The  
145 resultant dataset [39], representing 1,341 arthropod species, was then screened with  
146 phyloFlash [40] which finds, extracts and identifies SSU rRNA sequences.

147

#### 148 *Targeted screen of aquatic and terrestrial arthropods*

149 Both the BOLD and SRA datasets have inherent biases which make them unsuitable to assess  
150 whether *Torix Rickettsia* are more common in aquatic or terrestrial biomes. For example, most  
151 SRA submissions are from lab-reared terrestrial insects. Likewise, a majority of the BOLD  
152 specimens containing *Rickettsia* have limited taxonomic and ecological information, by virtue  
153 of not returning an mtDNA *COI* sequence. Therefore, a targeted PCR screen of 1,612  
154 individuals from 169 species was undertaken (Table 1) using primers which hybridise with all  
155 known clades of *Rickettsia* [27]. Within this, we included a range of both aquatic and terrestrial  
156 taxa, to investigate if the previous work highlighting particular aquatic taxa as hot spots for  
157 *Rickettsia* symbiosis (water beetles, biting midges, damselflies) reflects a wider higher  
158 incidence in species from this habitat.

159

## 160 **Analyses**

161 *Torix Rickettsia* is the most common bacterial contaminant produced during barcoding  
162 projects

163 Out of 3,817 sequences considered as not matching initial morphological assignment, 1,126  
164 of these were deemed by BOLD to be bacterial in origin (Figure 1, [36]). The taxonomic  
165 classification tool, Kaiju, further supported bacterial designation for all sequences except one

166 (Additional file 1), although this was later confirmed as *Rickettsia* through phylogenetic  
167 placement. Phylogenetic placement further confirmed the correct designation of bacterial  
168 sequences (Figure 2 and Additional file 2). The dominant genus was *Rickettsia* with 753  
169 (66.9%) amplifications, compared to *Wolbachia* with 306 (27.2%). Of the remaining 67 non-  
170 target sequences, 14 formed a monophyletic group with other Anaplasmataceae and 48  
171 clustered with the order Legionellales, with 5 sequences remaining undesignated. When  
172 considering the 184,585 specimens in the total project, this analysis gave an overall *Rickettsia*  
173 and *Wolbachia* frequency of 0.41% and 0.17% respectively within the dataset. Through later  
174 access to the 55,366 representative data subset from where the contaminants originated, a  
175 further 245 unique bacteria contaminants were also detected by Kaiju (possibly missed by  
176 BOLD's automated contaminant filtering system) (Additional file 1). This additional finding  
177 suggests these frequencies are conservative estimates.

178

179 BOLD *Rickettsia* contaminants were dominated by amplicons from the Torix group of  
180 *Rickettsia* (716/753; 95.1%) (Figure 3 and Additional file 2). The remaining 37 *Rickettsia*  
181 clustered with Transitional/Spotted Fever (n=15), Belli (n=9), Rhyzobius (n=1) groups, while 12  
182 sequences formed two unique clades. Across arthropod hosts: 292 (38.8%) were derived from  
183 Hymenoptera; 189 (25.1%) from Diptera; 177 from Hemiptera (23.5%); 41 from Psocoptera  
184 (5.4%); 40 from Coleoptera (5.3%); 7 from Arachnida (0.9%); 4 from Trichoptera (0.5%); and  
185 single cases of Thysanoptera, Diplopoda and Dermaptera (0.1% each).

186

187 We observed that two sets of *COI* primers were responsible for 99% of *Rickettsia*  
188 amplifications (Additional file 3) with a majority (89%) amplifying with the primer combination

189 C\_LepFolF/C\_LepFolR [41]. Torix *Rickettsia* *COI* showed a stronger match to these primers at  
190 the 3' end (the site responsible for efficient primer annealing) compared to *Wolbachia* and  
191 other *Rickettsia* groups. Whilst all contained a SNP at the 3' priming end of C\_LepFolR, Torix  
192 *Rickettsia* (*Rickettsia* endosymbiont of *Culicoides newsteadii*; MWZE00000000) was the only  
193 sequence to not contain a SNP at the 3' priming site of C\_LepFolF (Additional file 4).

194

#### 195 *Rickettsia* multilocus phylogenetic analysis

196 To better resolve the phylogenetic relationships between BOLD *Rickettsia* contaminants, a  
197 multilocus approach was employed on a subsample of 186 *Rickettsia*-containing samples  
198 chosen based on assorted geographic location, host order and phylogenetic placement. To  
199 this end, 2 further housekeeping genes (*16S rRNA*, *gltA*) and the antigenic *17KDa* protein gene  
200 were amplified and sequenced from the respective DNA extracts.

201

202 Overall, 135 extracts successfully amplified and gave a high-quality sequence for at least one  
203 gene. No intragenic or intergenic recombination was detected for any of the gene profiles. A  
204 phylogram, including 99 multilocus profiles containing at least 3 of the 4 *Rickettsia* genes of  
205 interest (including *COI*), allocated strains to both Limoniae and Leech subclades of the Torix  
206 group (Figure 4) and these subclades were derived from similar hosts. For example, specific  
207 families (Hemiptera: Psyllidae and Hymenoptera: Diapriidae) were present in both Leech and  
208 Limoniae groups. A full list of multilocus profiles and *Rickettsia* group designation can be found  
209 in Additional file 5.

210



211 The multilocus study also provided evidence of co-infection with *Rickettsia*. During Sanger  
212 chromatogram analysis, double peaks were occasionally found at third codon sites from  
213 protein coding genes. This pattern was observed in 6/10 *Philotarsus californicus* individuals  
214 and in one member of each of the Psilidae, Sciaridae, Chironomidae and Diapriidae (Additional  
215 file 5). Where double peaks were observed, this was found consistently across markers within  
216 an individual specimen. This pattern corroborates a recent finding of double infections in  
217 *Odoantes* [28], suggesting co-infecting *Rickettsia* strains in hosts is a widespread phenomenon  
218 of the Torix group.

219

#### 220 *Barcoding success of Rickettsia host taxa*

221 An available subset of specimens associated with the contaminants contained 55,366 out of  
222 184,585 arthropods originally used in the overall study [37]. The three classes of Insecta  
223 (n=49,688), Arachnida (n=3,626) and Collembola (n=1,957), accounted for >99.8% of total  
224 specimens (Figure 1). Successful amplification and sequencing of *COI* was achieved in 43,246  
225 specimens (78.1%) of the DNA extracts, but when assessed at the order level success rates  
226 varied (Additional file 6). The likely explanation for this variation is taxa-specific divergence of  
227 sequences at priming sites.

228

229 The number of each taxonomic order giving at least one *Rickettsia* amplification was then  
230 calculated and adjusted based on the total number of specimens in the project to allow for a  
231 frequency estimate. Overall, Hymenoptera, Diptera and Hemiptera were the three taxa most  
232 likely to be associated with *Rickettsia COI* amplification (87.4%). Similarly, on assessment of a  
233 subsample from the project where the contaminants originated, a majority (77.7%) of the

234 dataset were also accounted for by these three orders. After adjusting the frequency to take  
235 into account the number of inaccessible specimens, Trichoptera (2.45%), Dermaptera (1.89%)  
236 and Psocodea (1.67%) were the most likely taxa to give an inadvertent *Rickettsia* amplification.  
237 Whilst Hemiptera and Diptera had a similar estimated frequency of *Rickettsia* amplification  
238 (0.58% and 0.56%), Hemiptera were much more likely to fail to barcode (67.2% vs 93.3%),  
239 suggesting dipteran *Rickettsia* infection in BOLD specimens is likely to be higher than that of  
240 hemipterans, as a barcoding failure is necessary to amplify non-target bacteria *COI*. Attempts  
241 to re-barcode 186 *Rickettsia*-containing DNA extracts of interest from BOLD resulted in 90  
242 successful arthropod host barcodes (Additional file 5).

243

#### 244 *Targeted Rickettsia PCR screen and statistical comparison of terrestrial vs aquatic insects*

245 The screening of aquatic invertebrates revealed 9 out of 57 species (15.79%) were positive in  
246 PCR assays (Table 1.1). DNA sequences confirmed that all were *Rickettsia* which lay within the  
247 Torix group (Figure 5), with the positive species comprising of 8 insect species and one mollusc.  
248 For the terrestrial invertebrates, PCR assays evidenced *Rickettsia* infection in 10 out of 112  
249 species (8.93%) with a mix of insect and spider hosts (4 and 6 species respectively, Table 1.2).  
250 *Rickettsia* from 8 host species (2 insects and 6 spiders) were identified as Torix *Rickettsia* (8 of  
251 112 species, 7.14%), while the other two host species carried *Rickettsia* from the Rhyzobius  
252 and Belli groups (Figure 5).

253

254 To reduce taxonomic hot spot biases (particularly from spiders), we compared the incidence  
255 of *Rickettsia* infection in aquatic vs terrestrial insects. Fisher's exact test analysis rejected the  
256 null hypothesis of equal representation, with aquatic taxa having a higher representation of

257 species with *Torix Rickettsia* than terrestrial ( $p$ -value = 0.013, Additional file 7). Examining the  
258 phylogenetically controlled set, with three matched insect orders (Coleoptera, Diptera,  
259 Hemiptera), again rejected the null hypothesis of equal representation, with aquatic taxa  
260 having a higher representation of species with *Torix Rickettsia* than terrestrial ( $p$ -value =  
261 0.025, Additional file 7).

262

263 [Insert Table 1 here]

264

#### 265 *SRA and GenBank Rickettsia searches*

266 During the SRA search, phyloFlash flagged 29 *Rickettsia* sequences in the groups: Belli (n=10),  
267 *Torix* (n=8), Transitional (n=6), *Rhyzobius* (n=2), and Spotted Fever (n=1), with the remaining  
268 two failing to form a monophyletic clade with any group (Figure 5). In addition, Kraken  
269 identified eight *Rickettsia*-containing arthropod SRA datasets missed by phyloFlash. Two of  
270 these were from the *Torix* group, in phantom midge hosts (Diptera: Chaoboridae: *Mochlonyx*  
271 *cinctipes* and *Chaoborus trivitattus*), with the remaining six placed in Belli and Spotted Fever  
272 groups [39].

273

274 phyloFlash was also used to retrieve 18S rRNA (eukaryotic) sequences which could potentially  
275 account for the *Rickettsia* observed in SRA datasets (e.g. through parasitisms or ingestion of  
276 *Rickettsia*-infected protists). Out of the 29 datasets analysed by phyloFlash, only one  
277 (SRR6313831) revealed an assembled 18S rRNA sequence aligned to a parasitoid wasp  
278 (*Hadrotrichodes waukheon*). Although reads aligned to protists were also present in 19/29  
279 datasets flagged by phyloFlash, the read depth for protists was much lower than the number

280 of *Rickettsia* reads [39]. This suggests that *Rickettsia*-infected protists are unlikely to account  
281 for the positives observed in the SRA datasets.

282

283 The search of GenBank revealed 11 deposits ascribed to host mtDNA that were in fact Torix  
284 *Rickettsia* sequences (Additional files 8 and 9).

285

### 286 *The hidden host diversity of Torix Rickettsia*

287 Overall, putative novel Torix hosts detected from all screening methods included taxa from  
288 the orders Dermoptera, Gastropoda, Trichoptera and Trombidiformes. Additionally, new  
289 Torix-associated families, genera and species were identified. These included  
290 haematophagous flies (*Simulium aureum*; *Anopheles plumbeus*; *Protocalliphora azurea*;  
291 Tabanidae), several parasitoid wasp families (e.g. Ceraphronidae; Diapriidae; Mymaridae),  
292 forest detritivores (e.g. Sciaridae; Mycetophilidae; Staphylinidae) and phloem-feeding bugs  
293 (Psyllidae; Ricaniidae). Feeding habits such as phloem-feeding, predation, detritivory or  
294 haematophagy were not correlated with any particular Torix *Rickettsia* subclade (Figure 6).  
295 Furthermore, parasitoid and aquatic lifestyles were seen across the phylogeny. All newly  
296 discovered putative Torix *Rickettsia* host taxa are described in Table 2, alongside previously  
297 discovered hosts in order to give an up to date overview of Torix-associated taxa.

298

299

300 [Insert Table 2 here]

301

302

## 303 Discussion

304 Symbiotic interactions between hosts and microbes are important drivers of host phenotype,  
305 with symbionts both contributing to, and degrading, host performance. Heritable microbes  
306 are particularly important contributors to arthropod biology, with marked attention focused  
307 on *Wolbachia*, the most common associate [9]. Members of the Rickettsiales, like *Wolbachia*,  
308 share an evolutionary history with mitochondria [42], such that a previous screen of BOLD  
309 submissions of mtDNA submissions observed *Wolbachia* as the main bacterial contaminant  
310 associated with DNA barcoding [34]. However, our screen found that *Rickettsia* amplicons  
311 were more commonly found in BOLD deposits compared to *Wolbachia* (0.41% vs 0.17% of  
312 deposits). Furthermore, Torix group *Rickettsia* were overrepresented in barcode  
313 misamplifications (95%) when compared to other groups within the genus. A comparison of  
314 the most commonly used barcoding primers to *Wolbachia* and *Rickettsia* genomes suggest  
315 homology of the forward primer 3' end was likely responsible for this bias towards Torix  
316 *Rickettsia* amplification. To gain a clearer understanding of the relative balance of Torix group  
317 to other *Rickettsia* within symbioses and habitats, a targeted screen and bioinformatic  
318 approach was also undertaken. Through these three screens, a broad range of host diversity  
319 associated with Torix *Rickettsia* was uncovered.

320

321 As the *in silico* and empirical evidence suggests *Rickettsia COI* amplification is not uncommon  
322 [31–33], why has this phenomenon not been described more widely before? The previous  
323 large-scale non-target *COI* study using BOLD submissions [34], revealed only *Wolbachia* hits.  
324 This screen involved comparison to a *Wolbachia*-specific reference library and was thus likely  
325 to miss *Rickettsia*. Additionally, there has been a lack of Torix *Rickettsia COI* homologues to

326 compare barcodes to until recently, where a multilocus identification system, including *COI*  
327 was devised [27]. Indeed, out of the non-target *COI* dataset received in this study, some of the  
328 *Rickettsia* contaminants were tentatively described by BOLD as *Wolbachia* due to the previous  
329 absence of publicly available *Rickettsia COI* to compare.

330

331 Although *Rickettsia* will only interfere with barcoding in a minority of cases (~0.4%), it is likely  
332 that alternate screening primers for some studies will need to be considered. In a  
333 demonstration of how unintended *Rickettsia* amplifications can affect phylogeographic  
334 studies relying on DNA barcoding, a *Rickettsia COI* was conflated with the mtDNA *COI* of a  
335 species of freshwater amphipod, *Paracalliope fluvitalis* [30]. Subsequently, supposed unique  
336 mtDNA haplotypes were allocated to a particular collection site, whereas this merely  
337 demonstrated the presence of Torix *Rickettsia* in host individuals in this lake. Contrastingly,  
338 non-target *Rickettsia* amplification can also allow for the elucidation of a novel host range of  
339 the symbiont [31–33] and this has been exemplified with our probing of BOLD.

340

341 Previously, several host orders have been associated with Torix *Rickettsia*, including Araneae,  
342 Coleoptera, Diptera, Hemiptera and Odonata [24,28,43–45]. Newly uncovered putative host  
343 orders from this study include Dermaptera, Gastropoda, Trichoptera and Trombidiformes  
344 (Table 2). These data emphasise the broad host range of Torix *Rickettsia* across arthropods  
345 and invertebrates, with two additional cases from nucleariid amoebae [25,26]. This host range  
346 is complementary to *Rickettsia*'s sister genus '*Candidatus Megaira*' (formally the Hydra group  
347 of *Rickettsia*) which are present in multiple unicellular eukaryote families, and in a few  
348 invertebrates like *Hydra* [46].

349

350 Caution needs to be taken when interpreting what these newly found associations mean, as  
351 mere presence of *Rickettsia* DNA does not definitively indicate an endosymbiotic association.  
352 For example, bacterial DNA integrations into the host nuclear genome have been widely  
353 reported [47]. However, none of the protein-coding genes sequenced in this study showed  
354 signs of a frameshift, suggesting a lack of pseudogenization that is typical of a nuclear  
355 insertion. Furthermore, parasitism or ingestion of symbiont-infected biota (e.g. protists) could  
356 also result in bacteria detection [48–50]. Whilst protist reads were found in some datasets,  
357 these were usually at a much lower depth compared to the symbiont [39]. In one of the few  
358 instances where protist reads were greater than *Rickettsia* (Dataset SRR5298327), this was  
359 from our own previous study where a true endosymbiosis between insect and symbiont was  
360 confirmed through FISH imaging [27]. Similarly, although an 18S sequence aligned to a  
361 parasitoid wasp was observed in the SRA dataset from *Bemisia tabaci* (SRR6313831), previous  
362 work has also demonstrated a true endosymbiosis between *B. tabaci* and *Torix Rickettsia* [51].  
363 Overall, these data suggest that detecting contamination from *Rickettsia*-infected taxa such  
364 as protists and parasitoid wasps is uncommon within our study.

365

366 Model-based estimation techniques suggest *Rickettsia* are present in between 20-42% of  
367 terrestrial arthropod species [12]. However, the targeted PCR screen in this study gave an  
368 estimated species prevalence of 8.9% for terrestrial species. This discrepancy is likely due to  
369 targeted screens often underestimating the incidence of symbiont hosts due to various  
370 methodological biases including small within-species sample sizes (missing low-prevalence  
371 infections) [29]. Importantly, the inclusion and exclusion of specific ecological niches can also



372 lead to a skewed view of *Rickettsia* symbioses. A previous review of *Rickettsia* bacterial and  
373 host diversity by Weinert et al. [13] suggested a possible (true) bias towards aquatic taxa in  
374 the Torix group. In accordance with this, our targeted screen demonstrated Torix *Rickettsia*  
375 infections were more prevalent in aquatic insect species compared to terrestrial (although this  
376 is likely not the case for invertebrates in general due to a Torix *Rickettsia* hot spot in spiders).  
377 Our observed over-representation of Torix group *Rickettsia* (17/19 strains) contrasts with  
378 Weinert's findings which show a predominance of Belli infections and is likely due to the latter  
379 study's near absence of screened aquatic insects and spiders. Our additional use of a  
380 bioinformatics approach based on the SRA appears to confirm that Belli and Torix are two of  
381 the most common *Rickettsia* groups among arthropods. Overall, these multiple screening  
382 methods suggest Torix *Rickettsia* are more widespread than previously thought and their  
383 biological significance underestimated.

384

385 Previous studies have used either one or two markers to identify the relatedness of strains  
386 found in distinct hosts. In this study, we use the multilocus approach developed in Pilgrim et  
387 al. [27] to understand the affiliation of Torix *Rickettsia* from diverse invertebrate hosts. Our  
388 analysis of Torix strains indicates that closely related strains are found in distantly related taxa.  
389 Closely related *Rickettsia* are also found in putative hosts from different niches and habitats –  
390 for instance, the *Rickettsia* strains found in terrestrial blood feeders do not lie in a single clade,  
391 but rather are allied to strains found in non-blood feeding host species. Likewise, strains in  
392 phloem-feeding insects are diverse rather than commonly shared.

393

394 The distribution of *Torix Rickettsia* across a broad host range suggests host shifts are occurring  
395 between distantly related taxa. It is notable that parasitoid wasps are commonly infected with  
396 *Rickettsia* and have been associated with enabling symbiont host shifts [48]. Aside from  
397 endoparasitoids, it is also possible that plant-feeding can allow for endosymbiont horizontal  
398 transmission [52,53]. For example, *Rickettsia* horizontal transmission has been demonstrated  
399 in *Bemisia* whiteflies infected by phloem-feeding [52,54]. Finally, ectoparasites like the *Torix*-  
400 infected water mites of the Calyptostomatidae family, could also play a role in establishing  
401 novel *Rickettsia*-host associations, as feeding by mites has been observed to lead to host shifts  
402 for other endosymbiont taxa [55]. Indeed, if multiple horizontal transmission paths do exist,  
403 this could account for the diverse plethora of infected taxa, as well as arthropods identified in  
404 this study which harbour more than one strain of symbiont [56].

405

406 The finding that *Torix Rickettsia* are associated with a broad range of invertebrates leads to  
407 an obvious question: what is the impact and importance of these symbiotic associations?  
408 Previous work has established *Torix Rickettsia* represent heritable symbionts and it is likely  
409 that this is true generally. There have, however, been few studies on their impact on the host.  
410 In the earliest studies [22,23], *Torix* spp. leeches infected with *Rickettsia* were observed to be  
411 substantially larger than their uninfected counterparts. Since then, the only observation of  
412 note, pertaining to the *Torix* group, is the reduced ballooning (dispersal) behaviour observed  
413 in infected *Erigone atra* money spiders [57]. Overall, the incongruencies in host and *Torix*  
414 *Rickettsia* phylogenies (suggesting a lack of co-speciation and obligate mutualism), along with  
415 the lack of observed sex bias in carrying the symbiont, indicate facultative benefits are the  
416 most likely symbiotic relationship [29]. However, *Rickettsia* induction of thelytokous

417 parthenogenesis (observed in Belli *Rickettsia* [58,59]) should not be discounted in Torix  
418 infected parasitoid wasps identified in this study. To add to the challenge of understanding  
419 Torix *Rickettsia* symbioses, the challenges of laboratory rearing of many Torix *Rickettsia* hosts  
420 has led to difficulties in identifying model systems to work with. However, the large expansion  
421 of our Torix group host knowledge can now allow for a focus on cultivatable hosts (e.g phloem-  
422 feeding bugs).

423

424 To conclude, we have shown that large-scale DNA barcoding initiatives of arthropods can  
425 include non-target amplification of Torix *Rickettsia*. By examining these non-target sequences,  
426 alongside a targeted screen and SRA search, we have uncovered numerous previously  
427 undetected putative host associations. Our findings lay bare multiple new avenues of inquiry  
428 for Torix *Rickettsia* symbioses.

429

### 430 **Potential Implications**

431 A particularly important group for future study of Torix *Rickettsia* interactions are  
432 haematophagous host species. Our discovery of *Rickettsia*-associated tabanid and simuliid  
433 flies, alongside *Anopheles plumbeus* mosquitoes, add to existing blood-feeders previously  
434 identified as Torix group hosts which include sand flies [60,61], fleas [62], ticks [63,64] bed  
435 bugs [65] and biting midges [27]. Some *Rickettsia* strains are known to be transmitted to  
436 vertebrates via haematophagy [66]. However, there is no evidence to date for vertebrate  
437 pathogenic potential for the Torix group. Despite this, Torix *Rickettsia* could still play a  
438 significant role in the ecology of vectors of disease. A key avenue of research is whether these  
439 endosymbionts alter vectorial capacity, as found for other associations [67]. In contrast to the

440 widely reported virus blocking phenotype observed in *Wolbachia*-infected vectors [68,69],  
441 Torix *Rickettsia* has recently been associated with a virus potentiating effect in *Bemisia* white  
442 flies vectoring Tomato yellow leaf curl virus [70]. Additionally, we uncovered a *Rickettsia*-  
443 infected psyllid (*Cacopsylla melanoneura*) which is a vector of *Phytoplasma mali* (apple  
444 proliferation) [71]. Thus, the question of Torix *Rickettsia* vector-competence effects is clearly  
445 of widespread relevance and deserves further attention.

446

## 447 **Methods**

### 448 **a) Interrogation of the Barcode of Life Data System (BOLD)**

#### 449 *Assessment of non-target microbe amplicons*

450 BOLD data curation involves identifying non-target *COI* sequences from common  
451 contaminants (e.g. human and bacteria) or erroneous morphological identifications [38]. The  
452 designation of bacterial contaminants by BOLD, from a dataset containing 3,817 non-target  
453 sequences [36], was confirmed by the taxonomic classification program, Kaiju, using default  
454 parameters [72]. Sequences were then placed phylogenetically to refine taxonomy further.  
455 To this end, barcodes confirmed as microbial sequences were aligned using the “L-INS-I”  
456 algorithm in MAFFT v7.4 [73] before using Gblocks [74] to exclude areas of the alignment with  
457 excessive gaps or poor alignment. ModelFinder [75] then determined the TIM3+F+I+G4 model  
458 to be used after selection based on default “auto” parameters using the Bayesian information  
459 criteria. A maximum likelihood (ML) phylogeny was then estimated with IQTree [76] using an  
460 alignment of 561 nucleotides and 1000 ultrafast bootstraps [77]. The Rickettsiales genera  
461 *Anaplasma*, *Rickettsia*, *Orientia* and *Wolbachia* (Supergroups A, B, E and F), as well as the  
462 Legionellales genera *Legionella* and *Rickettsiella*, were included in the analysis as references

463 (as suggested by Kaiju). Finally, both phylogram and cladogram trees (the latter for ease of  
464 presentation) were drawn and annotated based on host taxa (order) using the EvolView [78]  
465 online tree annotation and visualisation tools.

466

467 A determining factor for non-target amplification of bacteria is primer site matching to  
468 microbial associates. Subsequently, pairwise homology of the primer set predominantly used  
469 for BOLD barcode screening was compared to *Rickettsia* and *Wolbachia COI* genes.

470

#### 471 *Further phylogenetic analysis*

472 *COI* sequence alone provides an impression of the frequency with which *Rickettsia* associates  
473 are found in barcoding studies. However, they have limited value in describing the diversity of  
474 the *Rickettsia* found. To provide further insight into the diversity of *Rickettsia* using a  
475 multilocus approach, we obtained 186 DNA extracts from the archive at the Centre for  
476 Biodiversity Genomics (University of Guelph, Canada) that had provided *Rickettsia* amplicons  
477 in the previous screen. DNA extracts were chosen based on assorted geographic location, host  
478 order and phylogenetic placement. Multilocus PCR screening and phylogenetic analysis of  
479 *Rickettsia* was then completed, using the methodology in Pilgrim et al. which utilised primers  
480 conserved across all known clades of the *Rickettsia* genus [27]. However, slight variations  
481 include the exclusion of the *atpA* gene due to observed recombination at this locus.  
482 Furthermore, the amplification conditions for the *17KDa* locus was changed because a *Torix*  
483 *Rickettsia* reference DNA extract (Host: *Simulium aureum*) failed to amplify with the primer  
484 set Ri\_17KD\_F/ Ri\_17KD\_R from Pilgrim et al. [27]. Subsequently, a *17KDa* alignment from  
485 genomes spanning the Spotted fever, Typhus, Transitional, Belli, Limoniae groups, and the

486 genus '*Candidatus Megaira*' was generated to design a new set of primers using the online  
487 tool PriFi [79].

488

489 Once multilocus profiles of the *Rickettsia* had been established, we tested for recombination  
490 within and between loci using RDP v4 [80] using the MaxChi, RDP, Chimaera, Bootscan and  
491 GENECONV algorithms with the following criteria to assess a true recombination positive: a p-  
492 value of <0.001; sequences were considered linear with 1000 permutations being performed.  
493 Samples amplifying at least 3 out of 4 genes (*16S rRNA*, *17KDa*, *COI* and *gltA*) were then  
494 concatenated and their relatedness estimated using maximum likelihood as previously  
495 described. The selected models used in the concatenated partition scheme [81] were as  
496 follows: *16S rRNA*: TIM3+F+R2; *17KDa*: GTR+F+I+G4; *COI*:TVM+F+I+G4; *gltA*: TVM+F+I+G4.  
497 Accession numbers for all sequences used in phylogenetic analyses can be found in Additional  
498 file 10.

499

#### 500 *Re-barcoding Rickettsia-containing BOLD DNA extracts*

501 Aside from phylogenetic placement of these *Rickettsia*-containing samples, attempts were  
502 made to extract an mtDNA barcode from these taxa in order to identify the hosts of infected  
503 specimens. This is because morphological taxonomic classification of specimens in BOLD is  
504 usually only down to the order level before barcoding takes place. Previous non-target  
505 amplification of *Rickettsia* through DNA barcoding of arthropod DNA extracts had occurred in  
506 the bed bug *Cimex lectularius*, with a recovery of the true barcode after using the primer set  
507 C1-J-1718/HCO1490, which amplifies a shortened 455 bp sequence within the *COI* locus.  
508 Subsequently, all samples were screened using these primers or a further set of secondary *COI*

509 primers (LCOt\_1490/ MLepR1 and LepF1/C\_ANTMR1D) if the first failed to give an adequate  
510 host barcode. All *COI* and *Rickettsia* multilocus screening primer details, including references,  
511 are available in Additional file 11.

512

513 Cycling conditions for *COI* PCRs were as follows: initial denaturation at 95°C for 5 min, followed  
514 by 35 cycles of denaturation (94°C, 30 sec), annealing (50°C, 60 sec), extension (72°C, 90 sec),  
515 and a final extension at 72°C for 7 min. *Rickettsia* and host amplicons identified by gel  
516 electrophoresis were subsequently purified enzymatically (ExoSAP) and Sanger sequenced  
517 through both strands using a BigDye® Terminator v3.1 kit (Thermo Scientific, Waltham, USA),  
518 and capillary sequenced on a 3500 xL Genetic Analyser (Applied Biosystems, Austin, USA).  
519 Forward and reverse reads were assessed in UGENE [82] to create a consensus sequence by  
520 eye with a cut-off phred (Q) score [83] of 20. Primer regions were trimmed from barcodes  
521 before being matched to the GenBank database by BLAST based on default parameters and  
522 an e-value threshold of <1e-85. Host taxonomy was determined by a barcode-based  
523 assignment of the closest BLAST hit, under the following criteria modified from Ramage et al.  
524 [50]:

525 1) Species level designation for at least 98% sequence identity.

526 2) Genus level designation for at least 95% sequence identity.

527 3) Family level designation for at least 85% sequence identity.

528 Additionally, all sequences were required to be at least >200 bp in length.

529

530 *Assessment of barcoding success*



531 One of the factors determining a successful *COI* bacterial amplification is the initial failure of  
532 an extract to amplify mtDNA. Subsequently, to determine the likelihood of this event within  
533 taxa, we used the 55,366 specimen representative data subset [37] to evaluate failure rates.  
534 To this end, all orders of host which gave at least one non-target *Rickettsia COI* hit were  
535 assessed. The barcoding success rate was determined as the proportion of specimens which  
536 matched initial morphotaxa assignment and were not removed after BOLD quality control  
537 [38]. As the total *Rickettsia* count was from a larger dataset than the one made available, an  
538 adjusted infection frequency for each taxon was calculated based on the representative data  
539 subset.

540

#### 541 **b) Targeted and bioinformatic *Rickettsia* screens**

##### 542 *Targeted screen of aquatic and terrestrial arthropods*

543 Overall, 1,612 individuals from 169 species, including both terrestrial (DNA extracts derived  
544 from European material, mostly from Duron et al. [11]) and aquatic invertebrates (largely  
545 acquired from the UK between 2016-2018), were screened. mtDNA *COI* amplification was  
546 conducted as a control for DNA quality. Some arthropods which could not be identified down  
547 to the species level morphologically or from barcoding were referred to as 'sp.'. To investigate  
548 symbiont infection status, rickettsial-specific primers based on *gltA* and *16S rRNA* genes were  
549 used for conventional PCR screening [27], with Sanger sequences obtained from at least one  
550 specimen per *Rickettsia* positive species to identify any misamplification false positives. Newly  
551 identified hosts of interest from BOLD and targeted screens were then placed phylogenetically  
552 (see sections above) before being mapped by lifestyle and diet.

553

554 It is known that there are taxonomic hot spots for endosymbiont infection, with for instance  
555 spiders being a hot spot for a range of microbial symbionts [43]. Therefore, analyses were  
556 performed that were matched at a taxonomic level (i.e. each taxon was represented in both  
557 the aquatic and terrestrial pools). To this end, the incidence of *Torix Rickettsia* was first  
558 compared in all insects. However, within insects, there is taxon heterogeneity between  
559 aquatic and terrestrial biomes (e.g. Ephemeroptera, Plecoptera in aquatic only, Lepidoptera  
560 in terrestrial only). The analysis was therefore narrowed to match insect orders present in  
561 both the aquatic and terrestrial community. Three insect orders, Hemiptera, Diptera and  
562 Coleoptera, fulfilled this criterion with good representation from each biome. For each case,  
563 the ratios of the infected:non-infected species between aquatic and terrestrial communities  
564 were compared in a Fisher's exact test with a  $p$ -value significance level of  $\leq 0.05$ .

565

#### 566 *Search of the Sequence Read Archive (SRA) and GenBank*

567 The SRA dataset [39] containing one individual from 1,341 arthropod species was screened  
568 with phyloFlash [40] using default primers, which finds, extracts and identifies SSU rRNA  
569 sequences. Reconstructed full *16S rRNA* sequences affiliated to *Rickettsia* were extracted and  
570 compared to sequences derived from the targeted screen phylogenetically (see sections  
571 above) to assess group representation within the genus. The microbial composition of all SRA  
572 datasets that did not result in a reconstructed *Rickettsia 16S rRNA* with phyloFlash were re-  
573 evaluated using Kraken2 [84], a k-mer based taxonomic classifier for short DNA sequences. A  
574 cut-off of at least 40k reads assigned to *Rickettsia* taxa was applied for reporting potential  
575 infections (theoretical genome coverage of  $\sim 1 - 4X$  assuming an average genome size of  
576  $\sim 1.5\text{Mb}$ ). As *Rickettsia*-infected protists and parasitoids have previously been reported

577 [25,26,59], phyloFlash was also used to identify reads aligned to these taxa to account for  
 578 potential positives attributed to ingested protists or parasitisms.

579

580 We also examined GenBank for *Rickettsia* sequences deposited as invertebrate *COI* barcodes.

581 To this end, a BLAST search of Torix *Rickettsia COI* sequences from previous studies [27,32]

582 was conducted on the 29<sup>th</sup> June 2020. Sequences were putatively considered belonging to the

583 Torix group if their similarity was >90% and subsequently confirmed phylogenetically as

584 described above.

585

586 **Table 1.1.** Targeted *Rickettsia* screen of aquatic/semiaquatic invertebrates.

587

| Aquatic/Semiaquatic invertebrate group | Species                              | Location                      | Year        | No. tested | No positive |
|----------------------------------------|--------------------------------------|-------------------------------|-------------|------------|-------------|
| Ephemeroptera                          | <i>Baetis muticus</i>                | Stirling, Scotland, UK        | 2017        | 3          | 0           |
|                                        | <i>Baetis rhodani</i>                | Stirling, Scotland, UK        | 2017        | 3          | 0           |
|                                        | <i>Cloeon dipterum</i>               | Cheshire, UK                  | 2016        | 3          | 0           |
|                                        | <i>Ecdyonurus</i> sp.1               | Stirling, Scotland, UK        | 2017        | 5          | 0           |
|                                        | <i>Ecdyonurus</i> sp.2               | Cheshire, UK                  | 2016        | 3          | 0           |
|                                        | <i>Ecdyonurus venosus</i>            | Cheshire, UK                  | 2016        | 6          | 0           |
|                                        | <i>Leptophlebia vespertina</i>       | Hampshire, UK                 | 2016        | 1          | 0           |
|                                        | <i>Paraleptophlebia submarginata</i> | Stirling, Scotland, UK        | 2017        | 3          | 0           |
|                                        | <i>Rhithrogena semicolorata</i>      | Stirling, Scotland, UK        | 2017        | 3          | 0           |
| Trichoptera                            | <i>Hydropsyche</i> sp.               | Stirling, Scotland, UK        | 2017        | 3          | 0           |
|                                        | <i>Polycentropus flavomaculatus</i>  | Cheshire, UK                  | 2017        | 3          | 0           |
|                                        | <b><i>Rhyacophila dorsalis</i></b>   | <b>Stirling, Scotland, UK</b> | <b>2017</b> | <b>3</b>   | <b>2</b>    |
| Plecoptera                             | <i>Amphinemura sulcicollis</i>       | Stirling, Scotland, UK        | 2017        | 3          | 0           |
|                                        | <i>Dinocras cephalotes</i>           | Stirling, Scotland, UK        | 2017        | 3          | 0           |
|                                        | <i>Isoperla grammatica</i>           | Stirling, Scotland, UK        | 2017        | 3          | 0           |
|                                        | <i>Perla bipunctata</i>              | Stirling, Scotland, UK        | 2017        | 3          | 0           |
| Hemiptera                              | <i>Corixa punctata</i>               | Cheshire, UK                  | 2016        | 1          | 0           |
|                                        | <i>Gerris</i> sp.                    | Montferrier sur Lez, France   | 2006        | 12         | 0           |
|                                        | <i>Gerris thoracicus</i>             | Cheshire, UK                  | 2016        | 1          | 0           |
|                                        | <i>Hydrometra stagnorum</i>          | Montferrier sur Lez, France   | 2006        | 20         | 0           |
|                                        | <i>Nepa cinerea</i>                  | Montferrier sur Lez, France   | 2006        | 3          | 0           |
|                                        | <i>Notonecta glauca</i>              | Cheshire, UK                  | 2016        | 2          | 0           |
|                                        | <i>Plea minutissima</i>              | Notre Dame de Londres, France | 2006        | 8          | 0           |
|                                        | <i>Sigara lateralis</i>              | Notre Dame de Londres, France | 2006        | 6          | 0           |
|                                        | <b><i>Sigara striata</i></b>         | <b>Cheshire, UK</b>           | <b>2006</b> | <b>2</b>   | <b>1</b>    |
|                                        | <i>Aedes</i> sp.                     | Cheshire, UK                  | 2017        | 8          | 0           |
|                                        | <i>Aedes albopictus</i>              | Roma, Italy                   | 2005        | 20         | 0           |
|                                        | <b><i>Anopheles plumbeus</i></b>     | <b>Chester Zoo, UK</b>        | <b>2018</b> | <b>2</b>   | <b>2</b>    |

|            |                                                         |                                          |             |           |          |
|------------|---------------------------------------------------------|------------------------------------------|-------------|-----------|----------|
|            | <b>Chironomidae sp.</b>                                 | <b>Cheshire, UK</b>                      | <b>2016</b> | <b>4</b>  | <b>1</b> |
|            | <i>Chironomus acidophilus</i>                           | Cheshire, UK                             | 2017        | 1         | 0        |
|            | <i>Chironomus plumosus</i>                              | Notre Dame de Londres,<br>France         | 2006        | 20        | 0        |
|            | <i>Chironomus</i> sp.                                   | Cheshire, UK                             | 2016        | 4         | 0        |
|            | <i>Culex pipiens</i> (ssp.<br><i>quinquefasciatus</i> ) | Puerto Viejo de Talamanca,<br>Costa Rica | 2006        | 20        | 0        |
| Diptera    | <i>Culex pipiens pipiens</i>                            | St Nazaire de Pézan, France              | 2006        | 20        | 0        |
|            | <i>Eristalinus</i> sp.                                  | Cheshire, UK                             | 2016        | 3         | 0        |
|            | <i>Eristalis tenax</i>                                  | Montpellier (grotte du zoo),<br>France   | 2002        | 7         | 0        |
|            | <b><i>Glyptotendipes</i> sp.</b>                        | <b>Cheshire, UK</b>                      | <b>2016</b> | <b>1</b>  | <b>1</b> |
|            | <b><i>Hilara interstincta</i></b>                       | <b>Cheshire, UK</b>                      | <b>2017</b> | <b>3</b>  | <b>1</b> |
|            | <b><i>Simulium aureum</i></b>                           | <b>Hampshire, UK</b>                     | <b>2017</b> | <b>1</b>  | <b>1</b> |
|            | <i>Simulium ornatum</i>                                 | N/A                                      | 2003        | 12        | 0        |
|            | <i>Tipula</i> sp.                                       | UK                                       | 2006        | 10        | 0        |
|            | <i>Tipula oleracea</i>                                  | UK                                       | 2006        | 13        | 0        |
|            | <b><i>Zavrelimyia</i> sp.</b>                           | <b>Northumberland, UK</b>                | <b>2017</b> | <b>1</b>  | <b>1</b> |
|            | <i>Agabus bipustulatus</i>                              | Cheshire, UK                             | 2017        | 3         | 0        |
| Coleoptera | <i>Guignotus pusillus</i>                               | Notre Dame de Londres,<br>France         | 2006        | 12        | 0        |
|            | Unknown sp.1                                            | Cheshire, UK                             | 2017        | 2         | 0        |
|            | Unknown sp.2                                            | Cheshire, UK                             | 2017        | 3         | 0        |
| Acarina    | Unknown sp.                                             | Cheshire, UK                             | 2017        | 3         | 0        |
| Isopoda    | <i>Asellus aquaticus</i>                                | Cheshire, UK                             | 2016        | 3         | 0        |
| Amphipoda  | <i>Gammarus pulex</i>                                   | Stirling, Scotland, UK                   | 2017        | 3         | 0        |
|            | <i>Crangonyx pseudogracilis</i>                         | Cheshire, UK                             | 2016        | 6         | 0        |
|            | <i>Radix balthica</i>                                   | Cheshire, UK                             | 2016        | 3         | 0        |
| Gastropoda | <i>Planorbis</i> sp.                                    | Cheshire, UK                             | 2016        | 3         | 0        |
|            | <b><i>Galba truncatula</i></b>                          | <b>Cheshire, UK</b>                      | <b>2017</b> | <b>20</b> | <b>3</b> |
| Hirudinea  | <i>Erpobdella octoculata</i>                            | Cheshire, UK                             | 2016        | 2         | 0        |
|            | <i>Hemiclepsis marginata</i>                            | Cheshire, UK                             | 2017        | 1         | 0        |
| Tricladida | Unknown sp.                                             | Cheshire, UK                             | 2016        | 1         | 0        |

588

589 A species was deemed positive through PCR and designated to *Rickettsia* group after Sanger  
590 sequencing and phylogenetic placement. All strains belong to the Torix group.

591

592

593 **Table 1.2.** Targeted *Rickettsia* screen of terrestrial invertebrates.

594

| Terrestrial<br>Invertebrate group | Species                              | Location                   | Year        | Number<br>tested | Number<br>positive |
|-----------------------------------|--------------------------------------|----------------------------|-------------|------------------|--------------------|
|                                   | <i>Agelenopsis aperta</i>            | Tennessee, USA             | N/A         | 12               | 0                  |
|                                   | <i>Allopecosa pulverulenta</i>       | Berne, Germany             | N/A         | 16               | 0                  |
|                                   | <b><i>Amaurobius fenestralis</i></b> | <b>Montpellier, France</b> | <b>2006</b> | <b>16</b>        | <b>1</b>           |
|                                   | <i>Araneus diadematus</i>            | Beerse, Belgium            | N/A         | 19               | 0                  |
|                                   | <i>Araneus diadematus</i>            | Greater London, UK         | N/A         | 8                | 0                  |
|                                   | <i>Argiope bruennichi</i>            | Hamburg, Germany           | N/A         | 7                | 0                  |
|                                   | <i>Argiope lobata</i>                | Spain                      | N/A         | 7                | 0                  |
|                                   | <i>Argiope lobata</i>                | Israel                     | N/A         | 4                | 0                  |
|                                   | <i>Cyclosa conica</i>                | Brandenburg, Germany       | N/A         | 11               | 0                  |
|                                   | <i>Dysdera crocata</i>               | Montpellier, France        | 2006        | 2                | 0                  |
|                                   | <i>Enoplognatha ovata</i>            | Greater London, UK         | N/A         | 20               | 0                  |
|                                   | <i>Erigone atra</i>                  | Cheshire, UK               | 2017        | 1                | 0                  |

|            |                                       |                                  |             |           |           |
|------------|---------------------------------------|----------------------------------|-------------|-----------|-----------|
|            | <i>Evarcha falcata</i>                | Beerse, Belgium                  | N/A         | 5         | 0         |
|            | <i>Holochnemus pluchei</i>            | Montpellier, France              | 2006        | 7         | 0         |
|            | <b><i>Hylyphantes graminicola</i></b> | <b>Cheshire, UK</b>              | <b>2017</b> | <b>1</b>  | <b>1</b>  |
|            | <i>Larinioides cornutus</i>           | Greater London, UK               | N/A         | 6         | 0         |
|            | <i>Larinioides scolopetarius</i>      | Hamburg, Germany                 | N/A         | 17        | 0         |
|            | <b><i>Linyphia triangularis</i></b>   | <b>Berlin, Germany</b>           | <b>N/A</b>  | <b>9</b>  | <b>9</b>  |
|            | <i>Linyphia triangularis</i>          | Greater London, UK               | N/A         | 6         | 0         |
| Araneae    | <i>Lycosa</i> sp.                     | Cheshire, UK                     | 2017        | 2         | 0         |
|            | <i>Metellina mengei</i>               | Greater London, UK               | N/A         | 13        | 0         |
|            | <i>Metellina segmentata</i>           | Brandenburg, Germany             | N/A         | 9         | 0         |
|            | <i>Neriere clathrata</i>              | Beerse, Belgium                  | N/A         | 13        | 0         |
|            | <i>Neriere peltata</i>                | Cheshire, UK                     | 2017        | 1         | 0         |
|            | <i>Pachygnatha degeeri</i>            | Berne, Germany                   | N/A         | 11        | 0         |
|            | <i>Pachygnatha listeri</i>            | Beerse, Belgium                  | N/A         | 17        | 0         |
|            | <b><i>Pardosa lugubris</i></b>        | <b>Darmstadt, Germany</b>        | <b>N/A</b>  | <b>20</b> | <b>1</b>  |
|            | <i>Pardosa pullata</i>                | Brandenburg, Germany             | N/A         | 20        | 0         |
|            | <i>Pardosa purbeckensis</i>           | Belgium                          | N/A         | 19        | 0         |
|            | <b><i>Pholcus phalangioides</i></b>   | <b>Berlin, Germany</b>           | <b>N/A</b>  | <b>20</b> | <b>17</b> |
|            | <b><i>Pisaura mirabilis</i></b>       | <b>Greater London, UK</b>        | <b>N/A</b>  | <b>12</b> | <b>1</b>  |
|            | <i>Tetragnatha montana</i>            | Greater London, UK               | N/A         | 20        | 0         |
|            | <i>Tetragnatha</i> sp.                | Hampshire, UK                    | 2017        | 3         | 0         |
|            | Unknown sp.                           | Cheshire, UK                     | 2017        | 2         | 0         |
|            | <i>Xysticus cristatus</i>             | Cambridgeshire, UK               | N/A         | 16        | 0         |
| Opiliones  | <i>Leiobunum rotundum</i>             | Feurs, France                    | 2006        | 6         | 0         |
| Ixodida    | <i>Ixodes uriae</i>                   | Hornøya, Norway                  | 2005        | 19        | 0         |
|            | <i>Rhipicephalus microplus</i>        | New Caledonia, France            | 2003        | 1         | 0         |
| Scorpiones | <i>Euscorpium flavicauda</i>          | St Nazaire de Pézan,<br>France   | 2006        | 1         | 0         |
| Diplopoda  | <i>Ommatoiulus</i> sp.                | Cheshire, UK                     | 2016        | 1         | 0         |
| Neuroptera | Unknown sp.                           | Cheshire, UK                     | 2017        | 1         | 0         |
| Mecoptera  | <i>Panorpa</i> sp.                    | Cheshire, UK                     | 2017        | 2         | 0         |
|            | <i>Calliptamus italicus</i>           | Notre Dame de Londres,<br>France | 2016        | 18        | 0         |
| Orthoptera | <i>Chorthippus brunneus</i>           | Uk                               | 2006        | 20        | 0         |
|            | <i>Grylломорpha dalmatina</i>         | Montpellier, France              | 2006        | 2         | 0         |
| Blattaria  | <i>Loboptera decipiens</i>            | Montpellier, France              | 2006        | 17        | 0         |
| Mantodea   | <i>Iris oratoria</i>                  | St Nazaire de Pézan,<br>France   | 2006        | 6         | 0         |
|            | <i>Mantis religiosa</i>               | Feurs, France                    | 2006        | 3         | 0         |
| Dermaptera | <i>Forficula Auricularia</i>          | Feurs, France                    | 2006        | 9         | 0         |
|            | <i>Aphis fabae</i>                    | Montpellier, France              | 2006        | 12        | 0         |
|            | <i>Aphis nerii</i>                    | Montpellier, France              | 2006        | 8         | 0         |
|            | <i>Baizongia pistaciae</i>            | Viols le Fort, France            | 2006        | 12        | 0         |
|            | <i>Cicadella viridis</i>              | L'Olme, France                   | 2006        | 16        | 0         |
|            | <b><i>Cimex lectularius</i></b>       | <b>Yorkshire, UK</b>             | <b>2008</b> | <b>12</b> | <b>12</b> |
| Hemiptera  | <i>Elasmucha grisea</i>               | Greater London, UK               | 2006        | 16        | 0         |
|            | <i>Graphosoma italicum</i>            | Montpellier, France              | 2006        | 12        | 0         |
|            | <i>Lygaeus equestris</i>              | Montpellier, France              | 2006        | 12        | 0         |
|            | <i>Notostira elongata</i>             | L'Olme, France                   | 2006        | 11        | 0         |
|            | <i>Pyrrhocoris apterus</i>            | Montpellier, France              | 2006        | 11        | 0         |
|            | <i>Rhyparochromus vulgaris</i>        | Castelnaudary, France            | 2006        | 20        | 0         |
|            | <i>Anaspis frontalis</i>              | Mont Barri, France               | 2004        | 12        | 0         |
|            | <i>Anthaxia nitidula</i>              | Mont Barri, France               | 2004        | 20        | 0         |
|            | <i>Anthaxia</i> sp.                   | Mont Barri, France               | 2004        | 16        | 0         |
|            | <i>Calvia 14-guttata</i>              | Greater London, UK               | 2006        | 6         | 0         |
|            | <i>Capnodis tenebrionis</i>           | Montpellier, France              | 2006        | 1         | 0         |
|            | <i>Cetonia aurata</i>                 | Feurs, France                    | 2006        | 3         | 0         |
|            | <i>Cetonia aurata</i>                 | Mont Barri, France               | 2004        | 12        | 0         |
|            | <i>Chrysolina varians</i>             | Mont Barri, France               | 2004        | 18        | 0         |
|            | <i>Clytus arietis</i>                 | Mont Barri, France               | 2004        | 20        | 0         |

|                                |                                      |                               |             |           |           |
|--------------------------------|--------------------------------------|-------------------------------|-------------|-----------|-----------|
| Coleoptera                     | <i>Dermestes</i> sp.                 | Mont Barri, France            | 2004        | 20        | 0         |
|                                | <i>Dermestes tessellatocolis</i>     | Cheshire, UK                  | 2016        | 2         | 0         |
|                                | <i>Gastrophysa</i> sp.               | Greater London, UK            | 2006        | 20        | 0         |
|                                | <i>Geotrupes stercorarius</i>        | Mont Barri, France            | 2004        | 3         | 0         |
|                                | <i>Larinus scolymi</i>               | Aldira de Irmeros, Spain      | 2005        | 12        | 0         |
|                                | <i>Leptinotarsa decemlineata</i>     | Feurs, France                 | 2006        | 10        | 0         |
|                                | <i>Mordellistena</i> sp.             | Mont Barri, France            | 2004        | 10        | 0         |
|                                | <i>Oedemera</i> sp.                  | Mont Barri, France            | 2004        | 20        | 0         |
|                                | <i>Oncocerna</i> sp.                 | Mont Barri, France            | 2004        | 20        | 0         |
|                                | <b><i>Phyllobius argentatus</i></b>  | <b>Mont Barri, France</b>     | <b>2004</b> | <b>15</b> | <b>4†</b> |
| <i>Pseudovadonia livida</i>    | Mont Barri, France                   | 2004                          | 19          | 0         |           |
| <i>Stenopterus</i> sp.         | Mont Barri, France                   | 2004                          | 20          | 0         |           |
| Diptera                        | <i>Braula coeca</i>                  | Ouessant, France              | 2002        | 4         | 0         |
|                                | <i>Chorisops tunisiae</i>            | Montpellier, France           | 2003        | 8         | 0         |
|                                | <i>Delia antiqua</i>                 | N/A                           | N/A         | 11        | 0         |
|                                | <i>Delia platura</i>                 | N/A                           | N/A         | 11        | 0         |
|                                | <i>Delia radiacum</i>                | N/A                           | N/A         | 10        | 0         |
|                                | <i>Gasterophilus intestinalis</i>    | France                        | N/A         | 10        | 0         |
|                                | <i>Hippobosca equina</i>             | Restinclières, France         | 2006        | 15        | 0         |
|                                | <i>Lonchoptera lutea</i>             | Cheshire, UK                  | 2017        | 3         | 0         |
|                                | <i>Medetera petrophila</i>           | St Bazille de Putois, France  | 2003        | 12        | 0         |
|                                | <i>Musca domestica</i>               | L'Olme, France                | 2006        | 20        | 0         |
|                                | <i>Musca vitripennis</i>             | Notre Dame de Londres, France | 2003        | 8         | 0         |
|                                | <i>Neomyia cornicina</i>             | Notre Dame de Londres, France | 2003        | 8         | 0         |
|                                | <i>Protocalliphora</i> sp.           | Corse, France                 | 2003        | 2         | 0         |
|                                | <b><i>Protocalliphora azurea</i></b> | <b>Montpellier, France</b>    | <b>2005</b> | <b>12</b> | <b>12</b> |
| <i>Psila rosae</i>             | N/A                                  | N/A                           | 11          | 0         |           |
| <i>Stomoxys calcitrans</i>     | Le Malzieu, France                   | 2001                          | 11          | 0         |           |
| Lepidoptera                    | <i>Chilo phragmitellus</i>           | Feurs, France                 | 2006        | 10        | 0         |
|                                | <i>Euplagia quadripunctaria</i>      | Feurs, France                 | 2006        | 2         | 0         |
|                                | <i>Pieris brassicae</i>              | Feurs, France                 | 2006        | 7         | 0         |
|                                | <i>Plodia interpunctella</i>         | Montpellier, France           | 2006        | 12        | 0         |
|                                | <i>Thymelicus lineola</i>            | Greater London, UK            | 2006        | 15        | 0         |
|                                | <i>Thymelicus sylvestris</i>         | Greater London, UK            | 2006        | 2         | 0         |
| <i>Triodia sylvina</i>         | Montpellier, France                  | 2006                          | 4           | 0         |           |
| Hymenoptera                    | <i>Amblyteles armatorius</i>         | St Nazaire de Pézan, France   | 2006        | 1         | 0         |
|                                | <i>Amegilla albigena</i>             | St Nazaire de Pézan, France   | 2006        | 13        | 0         |
|                                | <i>Amegilla ochroleuca</i>           | St Nazaire de Pézan, France   | 2006        | 3         | 0         |
|                                | <i>Anthidium florentinum</i>         | St Nazaire de Pézan, France   | 2006        | 6         | 0         |
|                                | <i>Apis mellifera</i>                | UK                            | 2006        | 9         | 0         |
|                                | <i>Bombus terrestris</i>             | North West, Switzerland       | 2006        | 20        | 0         |
|                                | <i>Diplolepis rosae</i>              | L'Olme, France                | 2006        | 2         | 0         |
|                                | <i>Formica lugubris</i>              | UK                            | 2006        | 10        | 0         |
|                                | <b><i>Pachycrepoideus</i> sp.</b>    | <b>UK</b>                     | <b>N/A</b>  | <b>94</b> | <b>6†</b> |
|                                | <i>Polistes dominulus</i>            | St Nazaire de Pézan, France   | 2006        | 4         | 0         |
| <i>Polistes nimpha</i>         | St Nazaire de Pézan, France          | 2006                          | 19          | 0         |           |
| <i>Sceliphron caementarium</i> | St Nazaire de Pézan, France          | 2006                          | 3           | 0         |           |

596 A species was deemed positive through PCR and designated to *Rickettsia* group after Sanger  
 597 sequencing and phylogenetic placement. All strains belong to the Torix group except  
 598 †=*Rhyzobius* and ‡=*Belli*.

599  
 600 **Table 2.** Torix *Rickettsia* hosts known to date alongside screening method.  
 601

| Order      | Host                                                          | Screening method              | Reference         |
|------------|---------------------------------------------------------------|-------------------------------|-------------------|
| Amphipoda  | <b><i>Paracalliope fluviatilis</i><br/>(Paracalliopiidae)</b> | <b>GenBank search</b>         | <b>This study</b> |
|            | <i>Paraleptamphopus sp.</i><br>(Paraleptamphopidae)           | Barcoding                     | [33]              |
|            | Senticaudata sp.                                              | Barcoding                     | [33]              |
| Araneae    | <b><i>Amaurobius fenestralis</i><br/>(Amaurobiidae)</b>       | <b>Targeted PCR</b>           | <b>This study</b> |
|            | <i>Amaurobioides africana</i><br>(Anyphaenidae)               | Barcoding                     | [32]              |
|            | <i>Araneus diadematus</i><br>(Araneidae)                      | Targeted PCR                  | [43]              |
|            | <i>Dysdera microdonta</i><br>(Dysderidae)                     | Barcoding                     | [31]              |
|            | <i>Linyphiidae</i> spp.                                       | Targeted PCR                  | [43]              |
|            | <b><i>Linyphia triangularis</i><br/>(Linyphiidae)</b>         | <b>Targeted PCR</b>           | <b>This study</b> |
|            | <b><i>Pardosa lugubris</i><br/>(Lycosidae)</b>                | <b>Targeted PCR</b>           | <b>This study</b> |
|            | <b><i>Pholcus phalangioides</i><br/>(Pholcidae)</b>           | <b>Targeted PCR</b>           | <b>This study</b> |
|            | <b><i>Pisaura mirabilis</i><br/>(Pisauridae)</b>              | <b>Targeted PCR</b>           | <b>This study</b> |
|            | <i>Metellina mendei</i><br>(Tetragnathidae)                   | Targeted PCR                  | [43]              |
| Coleoptera | <i>Deronectes</i> spp.<br>(Dytiscidae)                        | Targeted PCR,<br>FISH and TEM | [24]              |
|            | <b><i>Dytiscidae</i> sp.</b>                                  | <b>Barcoding</b>              | <b>This study</b> |
|            | <i>Stegobium paniceum</i><br>(Ptinidae)                       | Non-targeted<br>(16S) PCR     | [85]              |
|            | <b><i>Prionocyphon limbatus</i><br/>(Scirtidae)</b>           | <b>Barcoding</b>              | <b>This study</b> |

|            |                                                       |                       |                        |
|------------|-------------------------------------------------------|-----------------------|------------------------|
|            | <i>Labidopullus appendiculatus</i><br>(Staphylinidae) | SRA search            | This study             |
|            | <i>Platyusa sonomae</i><br>(Staphylinidae)            | SRA search            | This study             |
|            | <i>Pseudomimeciton antennatum</i><br>(Staphylinidae)  | SRA search            | This study             |
|            | <i>Staphylinidae</i> sp.                              | Barcoding             | This study             |
|            | <i>Pimelia</i> sp.<br>(Tenebrionidae)                 | GenBank search        | This study             |
| Dermaptera | <i>Forficula</i> sp. (Forficulidae)                   | GenBank search        | This study             |
|            | unknown sp.                                           | Barcoding             | This study             |
| Diplopoda  | <i>Polydesmus complanatus</i><br>(Polydesmidae)       | Targeted PCR          | [86]                   |
|            | unknown sp.                                           | Barcoding             | This study             |
|            | <i>Protocalliphora azurea</i><br>(Calliphoridae)      | Targeted PCR          | This study             |
|            | <i>Cecidomyiidae</i> sp.                              | Barcoding             | This study             |
|            | <i>Chaoborus trivittatus</i><br>(Chaoboridae)         | SRA search            | This study             |
|            | <i>Mochlonyx cinctipes</i><br>(Chaoboridae)           | SRA search            | This study             |
|            | <i>Glyptotendipes</i> sp.<br>(Chironomidae)           | Targeted PCR          | This study             |
|            | <i>Zavrelimyia</i> sp.<br>(Chironomidae)              | Targeted PCR          | This study             |
|            | <i>Culicoides</i> spp.<br>(Ceratopogonidae)           | Targeted PCR and FISH | [27]                   |
|            | <i>Anopheles plumbeus</i><br>(Culicidae)              | Targeted PCR          | This study             |
|            | <i>Dolichopodidae</i> spp.                            | Targeted PCR          | [44]                   |
|            | <i>Empididae</i> spp.                                 | Targeted PCR          | [44]                   |
| Diptera    | <i>Limonia chorea</i><br>(Limoniidae)                 | N/A                   | Unpublished (AF322443) |
|            | <i>Boletina villosa</i><br>(Mycetophilidae)           | Barcoding             | This study             |
|            | <i>Gnoriste bilineata</i><br>(Mycetophilidae)         | SRA search            | This study             |
|            | <i>Mycetophila lunata</i><br>(Mycetophilidae)         | GenBank search        | This study             |
|            | <i>Psilidae</i> sp.                                   | Barcoding             | This study             |



|             |                                                      |                                       |                        |
|-------------|------------------------------------------------------|---------------------------------------|------------------------|
|             | <i>Lutzomyia apache</i><br>(Psychodidae)             | Targeted PCR                          | [61]                   |
|             | <i>Phlebotomus chinensis</i><br>(Psychodidae)        | Non-targeted<br>(16S) PCR             | [60]                   |
|             | <b><i>Sciaridae</i> sp.</b>                          | <b>Barcoding</b>                      | <b>This study</b>      |
|             | <b><i>Pherbellia tenuipes</i><br/>(Sciomyzidae)</b>  | <b>Barcoding</b>                      | <b>This study</b>      |
|             | <b><i>Simulium aureum</i><br/>(Simuliidae)</b>       | <b>Targeted PCR</b>                   | <b>This study</b>      |
|             | <b><i>Tabanidae</i> sp.</b>                          | <b>Barcoding</b>                      | <b>This study</b>      |
| Gastropoda  | <b><i>Galba truncatula</i><br/>(Lymnaeidae)</b>      | <b>Targeted PCR</b>                   | <b>This study</b>      |
| Haplotaxida | <i>Mesenchytraeus solifugus</i><br>(Enchytraeidae)   | Non-targeted<br>(16S) PCR             | [87]                   |
| Hemiptera   | <i>Bemisia tabaci</i><br>(Aleyrodidae)               | Targeted PCR<br>and FISH              | [51]                   |
|             | <i>Nephotettix cincticeps</i><br>(Cicadellidae)      | Targeted PCR,<br>FISH and TEM         | [88]                   |
|             | <i>Platypleura kaempferi</i><br>(Cicadidae)          | Non-targeted<br>(16S) PCR             | [89]                   |
|             | <b><i>Cimex lectularius</i><br/>(Cimicidae)</b>      | <b>Targeted PCR</b>                   | <b>This study/[65]</b> |
|             | <b><i>Sigara striata</i> (Corixidae)</b>             | <b>Targeted PCR</b>                   | <b>This study</b>      |
|             | <b><i>Metcalfa pruinosa</i><br/>(Flatidae)</b>       | <b>GenBank<br/>search</b>             | <b>This study</b>      |
|             | <b><i>Flavina</i> sp. (Issidae)</b>                  | <b>GenBank<br/>search</b>             | <b>This study</b>      |
|             | <i>Centrotus cornutus</i><br>(Membracidae)           | Non-targeted<br>(16S) PCR and<br>TEM  | [90]                   |
|             | <i>Gargara genistae</i><br>(Membracidae)             | Non-targeted<br>(16S) PCR and<br>TEM  | [90]                   |
|             | <i>Macrolophus pygmaeus</i><br>(Miridae)             | Non-targeted<br>(16S) PCR and<br>FISH | [45]                   |
|             | <b><i>Cacopsylla melanoneura</i><br/>(Psyllidae)</b> | <b>Barcoding</b>                      | <b>This study</b>      |
|             | <b><i>Chamaepsylla hartigii</i><br/>(Psyllidae)</b>  | <b>Barcoding</b>                      | <b>This study</b>      |
|             | <b><i>Ricaniidae</i> sp.</b>                         | <b>Barcoding</b>                      | <b>This study</b>      |

|             |                                                            |                                       |                        |
|-------------|------------------------------------------------------------|---------------------------------------|------------------------|
| Hirudinea   | <i>Hemiclepsis</i> spp.<br>(Glossiphoniidae)               | Targeted PCR<br>and TEM               | [23]                   |
|             | <i>Torix</i> spp.<br>(Glossiphoniidae)                     | Targeted PCR<br>and TEM               | [23]                   |
| Hymenoptera | <i>Asobara tabida</i><br>(Braconidae)                      | Non-targeted<br>(16S) PCR             | [91]                   |
|             | <b><i>Ceraphronidae</i> sp.</b>                            | <b>Barcoding</b>                      | <b>This study</b>      |
|             | <b><i>Diapriidae</i> sp.</b>                               | <b>Barcoding</b>                      | <b>This study</b>      |
|             | <b><i>Eucharitidae</i> sp.</b>                             | <b>GenBank<br/>search</b>             | <b>This study</b>      |
|             | <i>Quadrastichus mendeli</i><br>(Eulophidae)               | Non-targeted<br>(16S) PCR and<br>FISH | [92]                   |
|             | <b><i>Formicidae</i> sp.</b>                               | <b>GenBank<br/>search</b>             | <b>This study</b>      |
|             | <i>Atta colombica</i><br>(Formicidae)                      | Non-targeted<br>(16S) PCR             | Unpublished (LN570502) |
|             | <b><i>Megaspilidae</i> sp.</b>                             | <b>Barcoding</b>                      | <b>This study</b>      |
|             | <b><i>Mymaridae</i> sp.</b>                                | <b>Barcoding</b>                      | <b>This study</b>      |
|             | <b><i>Platygastridae</i> sp.</b>                           | <b>Barcoding</b>                      | <b>This study</b>      |
| Ixodida     | <i>Argas japonica</i> (Argasidae)                          | Non-targeted<br>(16S) PCR             | [64]                   |
|             | <i>Ixodes ricinus</i> (Ixodidae)                           | Targeted PCR                          | [63]                   |
| Megaloptera | <i>Sialis lutaria</i> (Sialidae)                           | Targeted PCR                          | [93]                   |
| Neuroptera  | <i>Chrysotropia ciliata</i><br>(Chrysopidae)               | Targeted PCR                          | [93]                   |
| Nucleariida | <i>Nuclearia pattersoni</i><br>(Nucleariidae)              | Non-targeted<br>(16S) PCR             | [25]                   |
|             | <i>Pompholyxophrys punicea</i><br>(Pompholyxophryidae)     | Single cell<br>sequencing             | [26]                   |
| Odonata     | <b><i>Calopteryx maculata</i><br/>(Calopterygidae)</b>     | <b>GenBank<br/>search</b>             | <b>This study</b>      |
|             | <i>Coenagrionidae</i> spp.                                 | Targeted PCR<br>and FISH              | [28]                   |
|             | <i>Sympetrum fonscolombii</i><br>(Libellulidae)            | Targeted PCR                          | [28]                   |
|             | <i>Polythoridae</i> spp.                                   | Targeted PCR                          | [28]                   |
|             | <i>Neoneura sylvatica</i><br>(Protoneuridae)               | Targeted PCR                          | [28]                   |
| Psocoptera  | <b><i>Myopsocidae</i> sp.</b>                              | <b>Barcoding</b>                      | <b>This study</b>      |
|             | <b><i>Philotarsus californicus</i><br/>(Philotarsidae)</b> | <b>Barcoding</b>                      | <b>This study</b>      |
|             | <i>Cerobasis guestfalica</i><br>(Trogidae)                 | Targeted PCR<br>and FISH              | [94]                   |

|                |                                                              |                  |                   |
|----------------|--------------------------------------------------------------|------------------|-------------------|
| Siphonaptera   | <i>Nosopsyllus fasciatus</i><br>(Ceratophyllidae)            | Targeted PCR     | [62]              |
| Trichoptera    | <b><i>Lepidostoma hoodi</i></b><br><b>(Lepidostomatidae)</b> | <b>Barcoding</b> | <b>This study</b> |
|                | <i>Rhyacophila dorsalis</i><br>(Rhyacophilidae)              | Targeted PCR     | This study        |
|                | <i>Sericostoma</i> sp.<br>(Sericostomatidae)                 | SRA search       | This study        |
| Trombidiformes | <b><i>Calyptostomatidae</i> sp.</b>                          | <b>Barcoding</b> | <b>This study</b> |

602

603 Bold entries indicate hosts identified in this study. FISH=fluorescence *in-situ* hybridisation;

604 TEM=transmission electron microscopy; SRA=sequence read archive. Accession numbers for

605 *Rickettsia* sequences from newly detected hosts can be found in Additional files 8 and 10.

606

## 607 Availability of Supporting Data and Materials

608 The data sets supporting the findings of this study are openly available in:

609 The Barcode of Life Data System (BOLD) repository at <http://dx.doi.org/10.5883/DS-RICKET>

610 and the Figshare repository at <http://dx.doi.org/10.6084/m9.figshare.12801107> and

611 <http://dx.doi.org/10.6084/m9.figshare.12801140>.

612 For DNA sequences, accessions are: Bioproject number PRJEB38316; LR798809-LR800243;

613 LR812141-LR812260; LR812269-LR812283; LR812678; LR813674-LR813676; LR813730.

614

## 615 Declarations

### 616 List of Abbreviations

617 BOLD = Barcode of Life Data System

618 COI = cytochrome c oxidase I

619 FISH = fluorescence *in-situ* hybridisation

620 SRA = Sequence Read Archive

621

622 **Ethics Approval**

623 Not applicable.

624

625 **Consent for Publication**

626 Not applicable.

627

628 **Competing Interests**

629 The authors declare that they have no competing interests.

630

631 **Funding**

632 This work was supported by: a BBSRC Doctoral Training Partnership studentship

633 (BB/M011186/1) awarded to JP; a Development and Promotion of Science and Technology

634 Talents Project (DPST) of the Institute for the Promotion of Teaching Science and Technology,

635 Thailand to PT and a Harry Smith Vacation studentship (Microbiology society) and a NERC

636 ACCE DTP studentship (NE/L002450/1) to HRD.

637

638 **Acknowledgments**

639 We would like to thank Dr. Michael Gerth for kindly providing comments on the manuscript.

640

641 **Author contributions**

642 JP, GDDH, MB and MAS: conception and design of the study. MAS, EVZ, SR and JRD:

643 assembling BOLD datasets and providing DNA extracts for laboratory experiments. Field and  
644 laboratory work: JP, CRM and PT. SRA work: HRD and SS. Analyses and interpretation of the  
645 data, drafting of the manuscript: JP, PT, HRD, GDDH, MB and SS. All authors assisted in  
646 critical revision of the manuscript.

647

## 648 **References**

- 649 1. McFall-Ngai M, Hadfield MG, Bosch TCG, Carey H V., Domazet-Lošo T, Douglas AE, et al.  
650 Animals in a bacterial world, a new imperative for the life sciences. *Proc Natl Acad Sci*.  
651 2013;110:3229–36.
- 652 2. Hurst GDD. Extended genomes: symbiosis and evolution. *Interface Focus*. 2017;7:20170001.
- 653 3. Łukasik P, Guo H, van Asch M, Ferrari J, Godfray HCJ. Protection against a fungal pathogen  
654 conferred by the aphid facultative endosymbionts *Rickettsia* and *Spiroplasma* is expressed in  
655 multiple host genotypes and species and is not influenced by co-infection with another  
656 symbiont. *J Evol Biol*. 2013;26:2654–61.
- 657 4. Teixeira L, Ferreira A, Ashburner M. The bacterial symbiont *Wolbachia* induces resistance  
658 to RNA viral infections in *Drosophila melanogaster*. *PLoS Biol*. 2008;6:2753–63.
- 659 5. Rio RVM, Attardo GM, Weiss BL. Grandeur Alliances: Symbiont metabolic integration and  
660 obligate arthropod hematophagy. *Trends Parasitol*. 2016;32:739–49.
- 661 6. Douglas AE. The microbial dimension in insect nutritional ecology. *Funct Ecol*. 2009;23:38–  
662 47.
- 663 7. Hurst GDD, Frost CL. Reproductive parasitism: Maternally inherited symbionts in a  
664 biparental world. *Cold Spring Harb Perspect Biol*. 2015;7:a017699.

- 665 8. Munson MA, Baumann P, Kinsey MG. *Buchnera* gen. nov. and *Buchnera aphidicola* sp. nov.,  
666 a taxon consisting of the mycetocyte-associated, primary endosymbionts of aphids. *Int J Syst*  
667 *Bacteriol.* 1991;41:566–8.
- 668 9. Zug R, Hammerstein P. Still a host of hosts for *Wolbachia*: Analysis of recent data suggests  
669 that 40% of terrestrial arthropod species are infected. *PLoS One.* 2012;7:e38544.
- 670 10. Siozios S, Gerth M, Griffin JS, Hurst GDD. Symbiosis: *Wolbachia* host shifts in the fast lane.  
671 *Curr Biol.* 2018;28:R269–71.
- 672 11. Duron O, Bouchon D, Boutin S, Bellamy L, Zhou L, Engelstädter J, et al. The diversity of  
673 reproductive parasites among arthropods: *Wolbachia* do not walk alone. *BMC Biol.* 2008;6:27.
- 674 12. Weinert LA, Araujo-Jnr E V, Ahmed MZ, Welch JJ. The incidence of bacterial endosymbionts  
675 in terrestrial arthropods. *Proc R Soc B.* 2015;282:20150249.
- 676 13. Weinert LA, Werren JH, Aebi A, Stone GN, Jiggins FM. Evolution and diversity of *Rickettsia*  
677 bacteria. *BMC Biol.* 2009;7:6.
- 678 14. Perlman SJ, Hunter MS, Zchori-Fein E. The emerging diversity of *Rickettsia*. *Proc R Soc B.*  
679 2006;273:2097–106.
- 680 15. Ricketts HT. A micro-organism which apparently has a specific relationship to Rocky  
681 Mountain spotted fever. *J Am Med Assoc.* 1909;52:379–80.
- 682 16. da Rocha-Lima H. Zur Aetiologie des Fleckfiebers. *Dtsch Medizinische Wochenschrift.*  
683 1916;53:567–9.
- 684 17. Werren JH, Hurst GD, Zhang W, Breeuwer JA, Stouthamer R, Majerus ME. *Rickettsial*  
685 relative associated with male killing in the ladybird beetle (*Adalia bipunctata*). *J Bacteriol.*  
686 1994;176:388–94.

- 687 18. Chen D-Q, Campbell BC, Purcell AH. A new *Rickettsia* from a herbivorous insect, the pea  
688 aphid *Acyrtosiphon pisum* (Harris). *Curr Microbiol.* 1996;33:123–8.
- 689 19. Hurst GDD, Walker LE, Majerus MEN. Bacterial infections of hemocytes associated with  
690 the maternally inherited male-killing trait in British populations of the two spot ladybird,  
691 *Adalia bipunctata*. *J Invertebr Pathol.* 1996;68:286–92.
- 692 20. Hendry TA, Hunter MS, Baltrus DA. The facultative symbiont *Rickettsia* protects an invasive  
693 whitefly against entomopathogenic *Pseudomonas syringae* strains. *Appl Environ Microbiol.*  
694 2014;80:7161–8.
- 695 21. Himler AG, Adachi-Hagimori T, Bergen JE, Kozuch A, Kelly SE, Tabashnik BE, et al. Rapid  
696 spread of a bacterial symbiont in an invasive whitefly is driven by fitness benefits and female  
697 bias. *Science.* 2011;332:254–6.
- 698 22. Kikuchi Y, Fukatsu T. *Rickettsia* infection in natural leech populations. *Microb Ecol.*  
699 2005;49:265–71.
- 700 23. Kikuchi Y, Sameshima S, Kitade O, Kojima J, Fukatsu T. Novel clade of *Rickettsia* spp. from  
701 leeches. *Appl Environ Microbiol.* 2002;68:999–1004.
- 702 24. KÜchler SM, Kehl S, Dettner K. Characterization and localization of *Rickettsia* sp. in water  
703 beetles of genus *Deronectes* (Coleoptera: Dytiscidae). *FEMS Microbiol Ecol.* 2009;68:201–11.
- 704 25. Dyková I, Veverková M, Fiala I, Macháčková B, Pecková H. *Nuclearia pattersoni* sp. n.  
705 (Filosea), a new species of amphizoic amoeba isolated from gills of roach (*Rutilus rutilus*), and  
706 its *Rickettsial* endosymbiont. *Folia Parasitol (Praha).* 2003;50:161–70.
- 707 26. Galindo LJ, Torruella G, Moreira D, Eglit Y, Simpson AGB, Völcker E, et al. Combined  
708 cultivation and single-cell approaches to the phylogenomics of nucleariid amoebae, close  
709 relatives of fungi. *Philos Trans R Soc B Biol Sci.* 2019;374:20190094.

- 710 27. Pilgrim J, Ander M, Garros C, Baylis M, Hurst GDD, Siozios S. Torix group Rickettsia are  
711 widespread in Culicoides biting midges (Diptera: Ceratopogonidae), reach high frequency and  
712 carry unique genomic features. *Environ Microbiol.* 2017;19:4238–55.
- 713 28. Thongprem P, Davison HR, Thompson DJ, Lorenzo-Carballa MO, Hurst GDD. Incidence and  
714 diversity of Torix Rickettsia–Odonata symbioses. *Microb Ecol.* 2020; DOI:10.1007/s00248-020-  
715 01568-9
- 716 29. Weinert LA. The diversity and phylogeny of Rickettsia. In: Morand S, Krasnov BR,  
717 Littlewood DTJ, editors. *Parasite diversity and diversification*. Cambridge: Cambridge  
718 University Press; 2015. p. 150–81.
- 719 30. Lagrue C, Joannes A, Poulin R, Blasco-Costa I. Genetic structure and host-parasite co-  
720 divergence: evidence for trait-specific local adaptation. *Biol J Linn Soc.* 2016;118:344–58.
- 721 31. Řezáč M, Gasparo F, Král J, Heneberg P. Integrative taxonomy and evolutionary history of  
722 a newly revealed spider *Dysdera ninnii* complex (Araneae: Dysderidae). *Zool J Linn Soc.*  
723 2014;172:451–74.
- 724 32. Ceccarelli FS, Haddad CR, Ramírez MJ. Endosymbiotic Rickettsiales (Alphaproteobacteria)  
725 from the spider genus *Amaurobioides* (Araneae: Anyphaenidae). *J Arachnol.* 2016;44:251–3.
- 726 33. Park E, Poulin R. Widespread Torix Rickettsia in New Zealand amphipods and the use of  
727 blocking primers to rescue host COI sequences. *Sci Rep.* 2020;10:16842.
- 728 34. Smith MA, Bertrand C, Crosby K, Eveleigh ES, Fernandez-Triana J, Fisher BL, et al.  
729 *Wolbachia* and DNA barcoding insects: Patterns, potential, and problems. *PLoS One.*  
730 2012;7:e36514.
- 731 35. BOLD: Barcode of Life Data System. 2007. <https://www.boldsystems.org/>  
732 Accessed 2 January 2018.



- 733 36. Smith MA, Pilgrim J, Zakharov E V., Dewaard JR, Ratnasingham S. BOLD contaminant pool  
734 (3,817 specimens) data. Figshare. 2020; DOI:10.6084/m9.figshare.12801107
- 735 37. Smith MA, Pilgrim J, Zakharov E V., Dewaard JR, Ratnasingham S. BOLD non-contaminant  
736 pool (55,366 specimens) data. Barcoding Of Life Data System. 2020; DOI:10.5883/DS-RICKET
- 737 38. Ratnasingham S, Hebert PDN. BOLD: The Barcode of Life Data System. *Mol Ecol Notes*.  
738 2007;7:355–64.
- 739 39. Davison HR, Siozios S. Rickettsia PhyloFlash and Kraken data from arthropod whole  
740 genome projects in the Sequence Read Archive. Figshare. 2020;  
741 DOI:10.6084/m9.figshare.12801140
- 742 40. Gruber-Vodicka HR, Seah BK, Pruesse E. phyloFlash: Rapid small-subunit rRNA profiling and  
743 targeted assembly from metagenomes. *mSystems*. 2020; DOI:10.1128/mSystems.00920-20
- 744 41. Hernández-Triana LM, Prosser SW, Rodríguez-Perez MA, Chaverri LG, Hebert PDN, Ryan  
745 Gregory T. Recovery of DNA barcodes from blackfly museum specimens (Diptera: Simuliidae)  
746 using primer sets that target a variety of sequence lengths. *Mol Ecol Resour*. 2014;14:508–18.
- 747 42. Wang Z, Wu M. An integrated phylogenomic approach toward pinpointing the origin of  
748 mitochondria. *Sci Rep*. 2015;5:7949.
- 749 43. Goodacre SL, Martin OY, Thomas CFG, Hewitt GM. Wolbachia and other endosymbiont  
750 infections in spiders. *Mol Ecol*. 2006;15:517–27.
- 751 44. Martin OY, Puniamoorthy N, Gubler A, Wimmer C, Bernasconi M V. Infections with  
752 Wolbachia, Spiroplasma, and Rickettsia in the Dolichopodidae and other Empidoidea. *Infect*  
753 *Genet Evol*. 2013;13:317–30.

- 754 45. Machtelinckx T, Van Leeuwen T, Van De Wiele T, Boon N, De Vos WH, Sanchez J-A, et al.  
755 Microbial community of predatory bugs of the genus *Macrolophus* (Hemiptera: Miridae). *BMC*  
756 *Microbiol.* 2012;12:S9.
- 757 46. Lanzoni O, Sabaneyeva E, Modeo L, Castelli M, Lebedeva N, Verni F, et al. Diversity and  
758 environmental distribution of the cosmopolitan endosymbiont “*Candidatus Megaira*”. *Sci Rep.*  
759 2019;9:1179.
- 760 47. Blaxter M. Symbiont genes in host genomes: Fragments with a future? *Cell Host Microbe.*  
761 2007;2:211-3.
- 762 48. Gehrler L, Vorburger C. Parasitoids as vectors of facultative bacterial endosymbionts in  
763 aphids. *Biol Lett.* 2012;8:613-5.
- 764 49. Le Clec’h W, Chevalier FD, Genty L, Bertaux J, Bouchon D, Sicard M. Cannibalism and  
765 predation as paths for horizontal passage of *Wolbachia* between terrestrial isopods.
- 766 50. Ramage T, Martins-Simoes P, Mialdea G, Allemand R, Duplouy A, Rouse P, et al. A DNA  
767 barcode-based survey of terrestrial arthropods in the Society Islands of French Polynesia: host  
768 diversity within the SymbioCode Project. *Eur J Taxon.* 2017;272.
- 769 51. Wang H, Lei T, Wang X, Maruthi MN, Zhu D, Cameron SL, et al. A newly recorded *Rickettsia*  
770 of the *Torix* group is a recent intruder and an endosymbiont in the whitefly *Bemisia tabaci*.  
771 *Environ Microbiol.* 2020;22:1207–21.
- 772 52. Caspi-Fluger A, Inbar M, Mozes-Daube N, Katzir N, Portnoy V, Belausov E, et al. Horizontal  
773 transmission of the insect symbiont *Rickettsia* is plant-mediated. *Proc R Soc B Biol Sci.*  
774 2012;279:1791–6.

- 775 53. Gonella E, Pajoro M, Marzorati M, Crotti E, Mandrioli M, Pontini M, et al. Plant-mediated  
776 interspecific horizontal transmission of an intracellular symbiont in insects. *Sci Rep.*  
777 2015;5:15811.
- 778 54. Li Y-H, Ahmed MZ, Li S-J, Lv N, Shi P-Q, Chen X-S, et al. Plant-mediated horizontal  
779 transmission of *Rickettsia* endosymbiont between different whitefly species. *FEMS Microbiol*  
780 *Ecol.* 2017;93.
- 781 55. Jaenike J, Polak M, Fiskin A, Helou M, Minhas M. Interspecific transmission of  
782 endosymbiotic *Spiroplasma* by mites. *Biol Lett.* 2007;3:23–5.
- 783 56. Morrow JL, Frommer M, Shearman DCA, Riegler M. Tropical tephritid fruit fly community  
784 with high incidence of shared *Wolbachia* strains as platform for horizontal transmission of  
785 endosymbionts. *Environ Microbiol.* 2014;16:3622–37.
- 786 57. Goodacre SL, Martin OY, Bonte D, Hutchings L, Woolley C, Ibrahim K, et al. Microbial  
787 modification of host long-distance dispersal capacity. *BMC Biol.* 2009;7:32.
- 788 58. Giorgini M, Bernardo U, Monti MM, Nappo AG, Gebiola M. *Rickettsia* symbionts cause  
789 parthenogenetic reproduction in the parasitoid wasp *Pnigalio soemius* (Hymenoptera:  
790 Eulophidae). *Appl Environ Microbiol.* 2010;76:2589–99.
- 791 59. Hagimori T, Abe Y, Date S, Miura K. The first finding of a *Rickettsia* bacterium associated  
792 with parthenogenesis induction among insects. *Curr Microbiol.* 2006;52:97–101.
- 793 60. Li K, Chen H, Jiang J, Li X, Xu J, Ma Y. Diversity of bacteriome associated with *Phlebotomus*  
794 *chinensis* (Diptera: Psychodidae) sand flies in two wild populations from China. *Sci Rep.*  
795 2016;6:36406.
- 796 61. Reeves WK, Kato CY, Gilchrist T. Pathogen screening and bionomics of *Lutzomyia apache*  
797 (Diptera: Psychodidae) in Wyoming, USA. *J Am Mosq Control Assoc.* 2008;24:444–7.

- 798 62. Song S, Chen C, Yang M, Zhao S, Wang B, Hornok S, et al. Diversity of Rickettsia species in  
799 border regions of northwestern China. *Parasit Vectors*. 2018;11:634.
- 800 63. Floris R, Yurtman AN, Margoni EF, Mignozzi K, Boemo B, Altobelli A, et al. Detection and  
801 identification of Rickettsia species in the Northeast of Italy. *Vector-Borne Zoonotic Dis*.  
802 2008;8:777–82.
- 803 64. Yan P, Qiu Z, Zhang T, Li Y, Wang W, Li M, et al. Microbial diversity in the tick *Argas*  
804 *japonicus* (Acari: Argasidae) with a focus on Rickettsia pathogens. *Med Vet Entomol*.  
805 2019;33:327–35.
- 806 65. Potts R, Molina I, Sheele JM, Pietri JE. Molecular detection of Rickettsia infection in field-  
807 collected bed bugs. *New Microbes New Infect*. 2020;34:100646.
- 808 66. Parola P, Paddock CD, Raoult D. Tick-borne Rickettsioses around the world: Emerging  
809 diseases challenging old concepts. *Clin Microbiol Rev*. 2005;18:719–56.
- 810 67. Hoffmann AA, Ross PA, Rašić G. Wolbachia strains for disease control: ecological and  
811 evolutionary considerations. *Evol Appl*. 2015;8:751–68.
- 812 68. Iturbe-Ormaetxe I, Walker T, O’Neill SL. Wolbachia and the biological control of mosquito-  
813 borne disease. *EMBO Rep*. 2011;12:508–18.
- 814 69. van den Hurk AF, Hall-Mendelin S, Pyke AT, Frentiu FD, McElroy K, Day A, et al. Impact of  
815 Wolbachia on infection with chikungunya and yellow fever viruses in the mosquito vector  
816 *Aedes aegypti*. *PLoS Negl Trop Dis*. 2012;6.
- 817 70. Kliot A, Cilia M, Czosnek H, Ghanim M. Implication of the bacterial endosymbiont Rickettsia  
818 spp. in interactions of the whitefly *Bemisia tabaci* with Tomato yellow leaf curl virus. *J Virol*.  
819 2014;88:5652–60.

- 820 71. Tedeschi R, Visentin C, Alam A, Bosco D. Epidemiology of apple proliferation (AP) in  
821 northwestern Italy: evaluation of the frequency of AP-positive psyllids in naturally infected  
822 populations of *Cacopsylla melanoneura* (Homoptera: Psyllidae). *Ann Appl Biol.* 2003;142:285-  
823 90.
- 824 72. Menzel P, Ng KL, Krogh A. Fast and sensitive taxonomic classification for metagenomics  
825 with Kaiju. *Nat Commun.* 2016;7:11257.
- 826 73. Katoh K, Standley DM. MAFFT Multiple sequence alignment software version 7:  
827 Improvements in performance and usability. *Mol Biol Evol.* 2013;30:772–80.
- 828 74. Castresana J. Selection of conserved blocks from multiple alignments for their use in  
829 phylogenetic analysis. *Mol Biol Evol.* 2000;17:540–52.
- 830 75. Kalyaanamoorthy S, Minh BQ, Wong TKF, von Haeseler A, Jermiin LS. ModelFinder: fast  
831 model selection for accurate phylogenetic estimates. *Nat Methods.* 2017;14:587–9.
- 832 76. Nguyen LT, Schmidt HA, Von Haeseler A, Minh BQ. IQ-TREE: A fast and effective stochastic  
833 algorithm for estimating maximum-likelihood phylogenies. *Mol Biol Evol.* 2015;32:268–74.
- 834 77. Hoang DT, Chernomor O, Haeseler A von, Minh BQ, Vinh LS. UFBoot2: Improving the  
835 ultrafast bootstrap approximation. *Mol Biol Evol.* 2017;35:518–22.
- 836 78. He Z, Zhang H, Gao S, Lercher MJ, Chen W-H, Hu S. Evolview v2: an online visualization and  
837 management tool for customized and annotated phylogenetic trees. *Nucleic Acids Res.*  
838 2016;44:W236–41.
- 839 79. Fredslund J, Schauer L, Madsen LH, Sandal N, Stougaard J. PriFi: using a multiple alignment  
840 of related sequences to find primers for amplification of homologs. *Nucleic Acids Res.*  
841 2005;33:W516–20.

- 842 80. Martin DP, Murrell B, Golden M, Khoosal A, Muhire B. RDP4: Detection and analysis of  
843 recombination patterns in virus genomes. *Virus Evol.* 2015;1:1–5.
- 844 81. Chernomor O, von Haeseler A, Minh BQ. Terrace aware data structure for phylogenomic  
845 inference from supermatrices. *Syst Biol.* 2016;65:997–1008.
- 846 82. Okonechnikov K, Golosova O, Fursov M. Unipro UGENE: a unified bioinformatics toolkit.  
847 *Bioinformatics.* 2012;28:1166–7.
- 848 83. Ewing B, Hillier L, Wendl MC, Green P. Base-calling of automated sequencer traces using  
849 Phred. I. Accuracy Assessment. *Genome Res.* 1998;8:175–85.
- 850 84. Wood DE, Lu J, Langmead B. Improved metagenomic analysis with Kraken 2. *Genome Biol.*  
851 2019;20:257.
- 852 85. Kölsch G, Synefiaridou D. Shared ancestry of symbionts? *Sagrinae* and *Donaciinae*  
853 (Coleoptera, Chrysomelidae) harbor similar bacteria. *Insects.* 2012;3:473–91.
- 854 86. Li K, Stanojević M, Stamenković G, Ilić B, Paunović M, Lu M, et al. Insight into diversity of  
855 bacteria belonging to the order Rickettsiales in 9 arthropods species collected in Serbia. *Sci*  
856 *Rep.* 2019;9:18680.
- 857 87. Murakami T, Segawa T, Bodington D, Dial R, Takeuchi N, Kohshima S, et al. Census of  
858 bacterial microbiota associated with the glacier ice worm *Mesenchytraeus solifugus*. *FEMS*  
859 *Microbiol Ecol.* 2015;91.
- 860 88. Noda H, Watanabe K, Kawai S, Yukuhiro F, Miyoshi T, Tomizawa M, et al. Bacteriome-  
861 associated endosymbionts of the green rice leafhopper *Nephotettix cincticeps* (Hemiptera:  
862 *Cicadellidae*). *Appl Entomol Zool.* 2012;47:217–25.

- 863 89. Zheng Z, Wang D, He H, Wei C. Bacterial diversity of bacteriomes and organs of  
864 reproductive, digestive and excretory systems in two cicada species (Hemiptera: Cicadidae).  
865 PLoS One. 2017;12:e0175903.
- 866 90. Kobińska M, Michalik A, Świerczewski D, Szklarzewicz T. Complex symbiotic systems of two  
867 treehopper species: *Centrotus cornutus* (Linnaeus, 1758) and *Gargara genistae* (Fabricius,  
868 1775) (Hemiptera: Cicadomorpha: Membracoidea: Membracidae). *Protoplasma*.  
869 2020;257:819–31.
- 870 91. Zouache K, Voronin D, Tran-Van V, Mavingui P. Composition of bacterial communities  
871 associated with natural and laboratory populations of *Asobara tabida* infected with  
872 *Wolbachia*. *Appl Environ Microbiol*. 2009;75:3755–64.
- 873 92. Gualtieri L, Nugnes F, Nappo AG, Gebiola M, Bernardo U. Life inside a gall: closeness does  
874 not favour horizontal transmission of *Rickettsia* between a gall wasp and its parasitoid. *FEMS*  
875 *Microbiol Ecol*. 2017;93.
- 876 93. Gerth M, Wolf R, Bleidorn C, Richter J, Sontowski R, Unrein J, et al. Green lacewings  
877 (Neuroptera: Chrysopidae) are commonly associated with a diversity of Rickettsial  
878 endosymbionts. *Zool Lett*. 2017;3:12.
- 879 94. Perotti MA, Clarke HK, Turner BD, Braig HR. *Rickettsia* as obligate and mycetomic  
880 bacteria. *FASEB J*. 2006;20:2372–4.

881

## 882 **Figure Legends**

883 **Figure 1.** Workflow of the BOLD project demonstrating the acquisition and fates of  
884 contaminant and non-contaminant *COI* barcoding sequences.

885

886 **Figure 2.** Cladogram of the maximum likelihood (ML) tree of 1,126 proteobacteria *COI* contaminants  
887 retrieved from a BOLD project incorporating 184,585 arthropod specimens. The tree is based on 561  
888 bp and is rooted with the free-living alphaproteobacteria *Pelagibacter ubique*. Parentheses indicate  
889 the number of BOLD contaminants present in each group. Tips are labelled by BOLD processing ID and  
890 host arthropod taxonomy. The Rickettsiales genera of *Anaplasma*, *Rickettsia* (collapsed node),  
891 *Orientia* and *Wolbachia* supergroups (A, B, E and F), as well as the Legionellales genera *Legionella* and  
892 *Rickettsiella*, are included as reference sequences (Accession numbers: Additional file 10).

893  
894 **Figure 3.** Cladogram of a maximum likelihood (ML) tree of 753 *COI Rickettsia* contaminants retrieved  
895 from a BOLD project incorporating 184,585 arthropod specimens. The tree is based on 561 bp and  
896 is rooted by the *Rickettsia* endosymbiont of *Ichthyophthirius multifiliis* (Candidatus Megaira) using  
897 the TVM+F+I+G4 model. Parentheses indicate the number of BOLD contaminants present in Torix  
898 and non-Torix *Rickettsia* groups. Tips are labelled by BOLD processing ID and host arthropod  
899 taxonomy. The *Rickettsia* groups: Spotted fever, Transitional, Belli, Typhus, Rhyzobius and Torix are  
900 included as references (Accession numbers: Additional file 10).

901  
902 **Figure 4.** Phylogram of the maximum likelihood (ML) tree of 99 *COI Rickettsia* contaminants (prefix  
903 “BIOUG”) used for further phylogenetic analysis and 53 Non-BOLD reference profiles (Accession  
904 numbers: Additional file 10). The tree is based on the concatenation of 4 loci; *16S rRNA*, *17KDa*, *gltA*  
905 and *COI* under a partition model, with profiles containing at least 3 out of 4 sites included in the tree  
906 (2,834 bp total) and is rooted by *Rickettsia* endosymbiont of *Ichthyophthirius multifiliis* (Candidatus  
907 Megaira). Tips are labelled by host arthropod taxonomy.

908



909 **Figure 5.** *16S rRNA* and *gltA* concatenated maximum likelihood (ML) phylogram (1,834 bp total)  
910 including *Rickettsia* hosts from SRA (Triangles) and targeted screens (Stars). The TIM3+F+R2 (16S)  
911 and K3Pu+F+G4 (*gltA*) models were chosen as best fitting models. Rooting is with *Orientia*  
912 *tsutsugamushi*. Accession numbers found in Additional file 10.

913  
914 **Figure 6.** Phylogram of a maximum likelihood (ML) tree of *COI Rickettsia* contaminants (prefix  
915 “BIOUG”) giving a host barcode and 43 Non-BOLD reference profiles. The tree is based on 4 loci;  
916 *16S rRNA*, *17KDa*, *gltA* and *COI* under a partition model with profiles containing at least 2 out of  
917 4 sites included in the tree (2,781 bp total) and is rooted by the *Rickettsia* endosymbiont of  
918 *Ichthyophthirius multifiliis* (*Candidatus* Megaira). The habitats and lifestyles of the host are given  
919 to the right of the phylogeny. Accession numbers found in Additional file 10.

920

## 921 **Additional file information**

922

923 **Additional file 1.docx** Taxonomic classification of BOLD non-target *COI* sequences via Kaiju.

924

925 **Additional file 2.7z** Rectangular phylogram trees of cladograms from Figures 2 and 3.

926

927 **Additional file 3.docx** Primer pairs involved in the unintended amplification of 753 *Rickettsia*

928 *COI* from BOLD project.

929

930 **Additional file 4.docx** Homology of *Rickettsia* groups and *Wolbachia* to the most common  
931 forward primers (C\_LepFolF and C\_LepFolR) attributed to bacterial *COI* amplification from  
932 arthropod DNA extracts.

933

934 **Additional file 5.xlsx** Re-barcoding status and nearest BLAST hit of mtDNA *COI* arthropod DNA  
935 extracts accessed for further analysis, along with the success of multilocus *Rickettsia* profiles  
936 with allocated *Rickettsia* group (based on phylogenetic analysis) and co-infection status.

937

938 **Additional file 6.docx** The barcoding success rate of taxa which gave at least one bacteria *COI*  
939 inadvertent amplification (N=51,475 accessible specimens) with an adjusted *Rickettsia*  
940 frequency based on an estimated total number of arthropods to account for inaccessible  
941 specimens (N=125,402).

942

943 **Additional file 7.docx** Fisher's Exact analyses for comparison of Torix *Rickettsia* infection in  
944 aquatic versus terrestrial insects.

945

946 **Additional file 8.docx** GenBank matches mistaken for true mtDNA barcodes and their  
947 homology to *Rickettsia COI* (Accessed 29<sup>th</sup> June 2020).

948

949 **Additional file 9.pdf** Phylogram of a maximum likelihood (ML) tree of *COI Rickettsia* found in the  
950 GenBank database erroneously identified as mtDNA barcodes based on 577 bp. The HKY+F+G4  
951 model was chosen as the best fitting model using Modelfinder with the Bayesian information  
952 criterion (BIC).

953

954 **Additional file 10.xlsx** Accession numbers used for phylogenetic analyses (Figures 2, 3, 4 ,5  
955 and 6). Accession numbers generated in this study are marked in BOLD.

956

957 **Additional file 11.docx** Mitochondrial *COI* and bacterial gene primers used for re-barcoding  
958 and multilocus phylogenetic analyses.

959

960

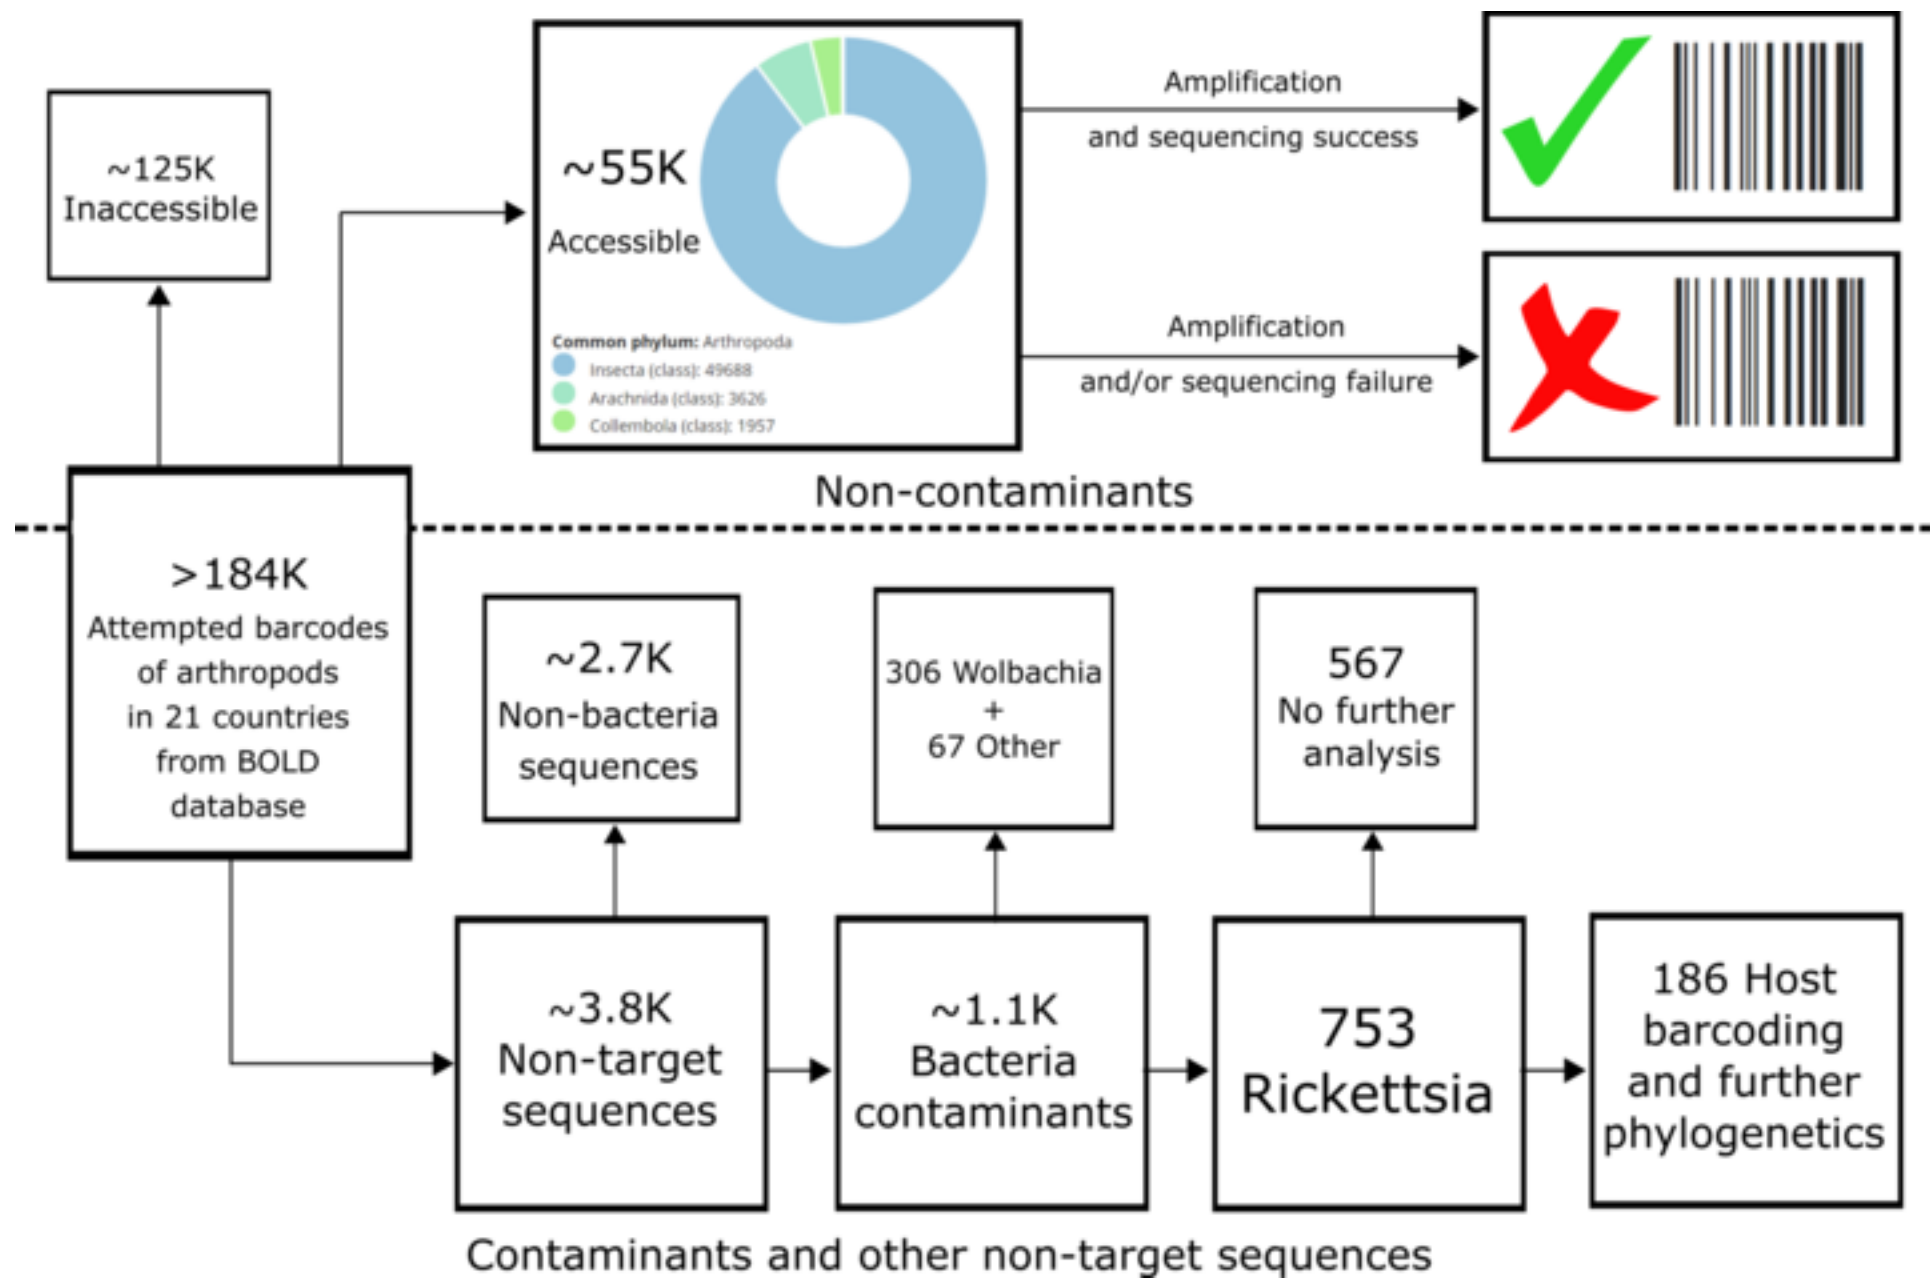



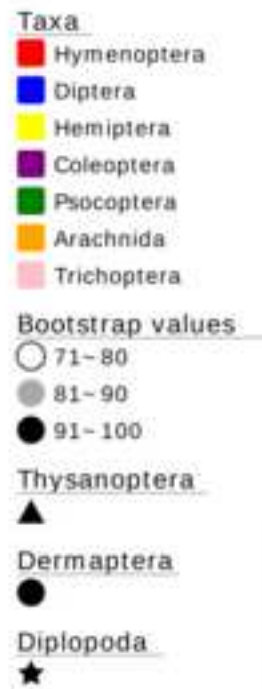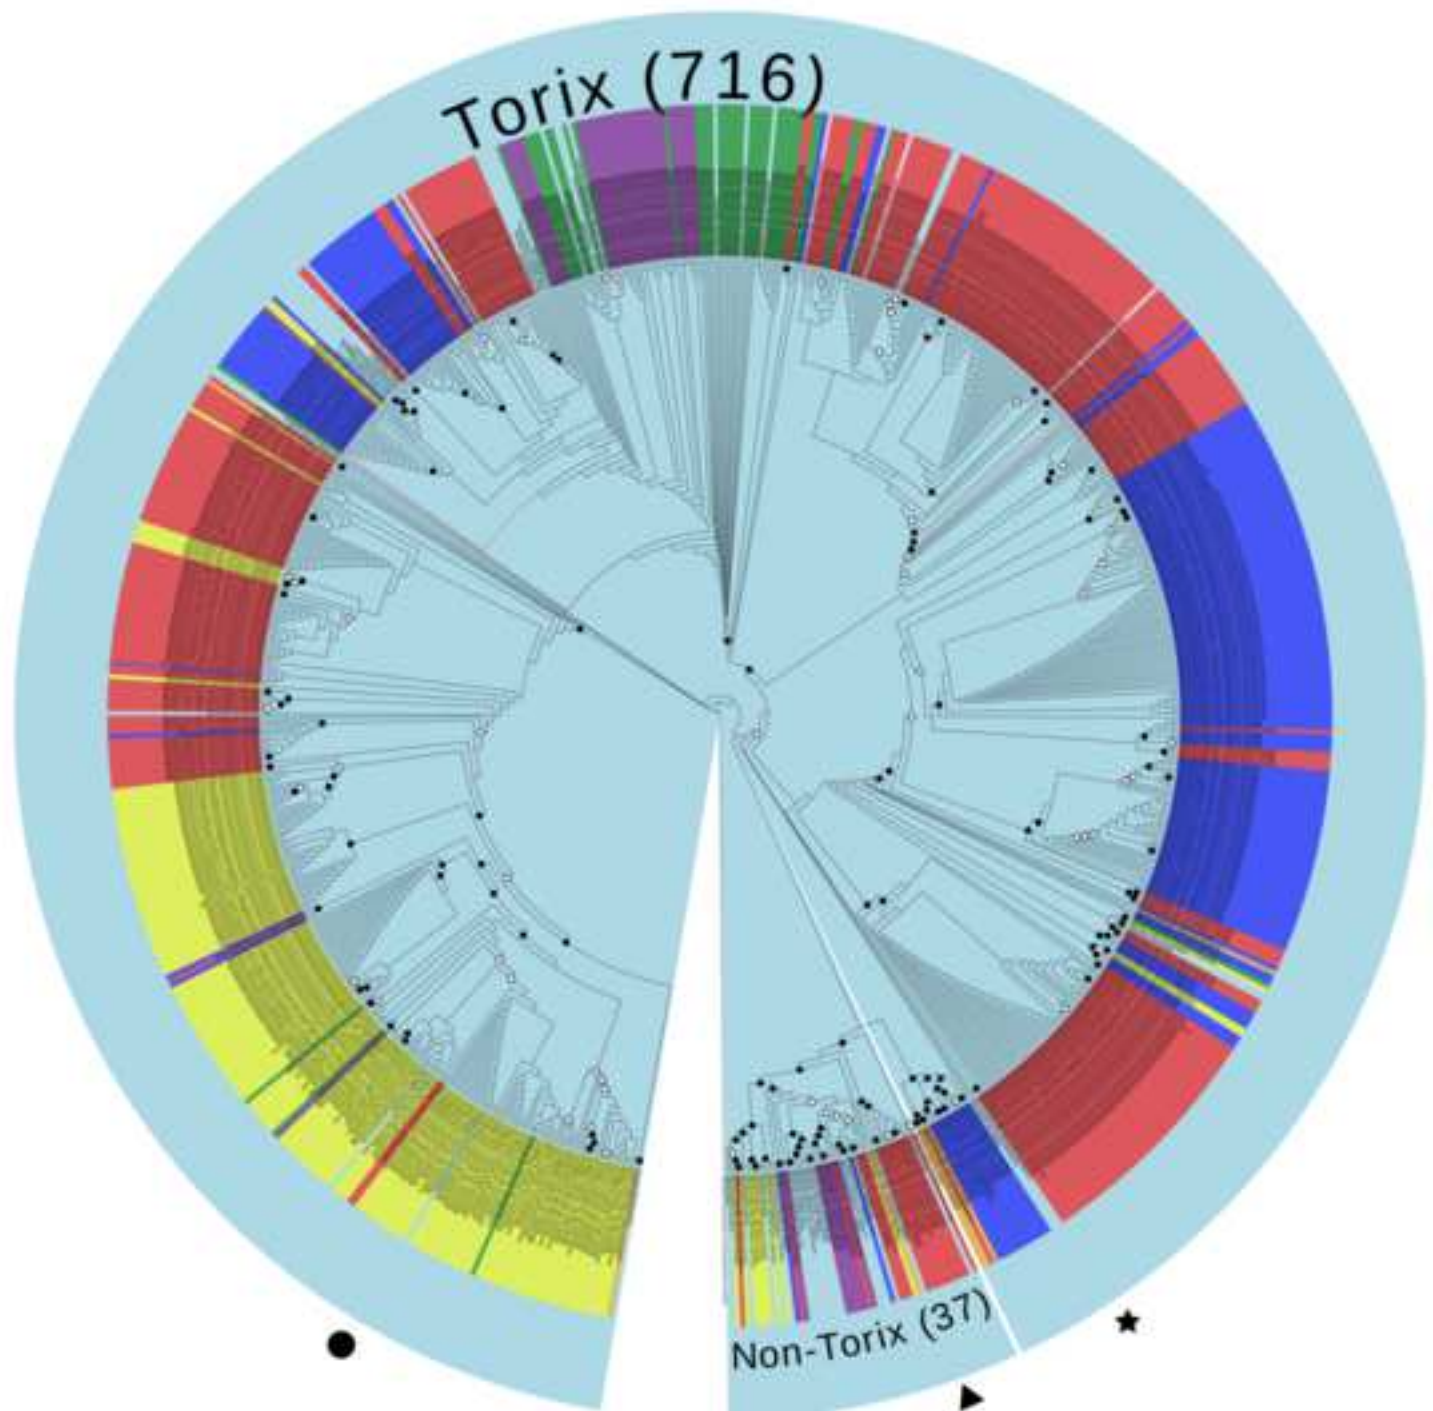





Figure 5

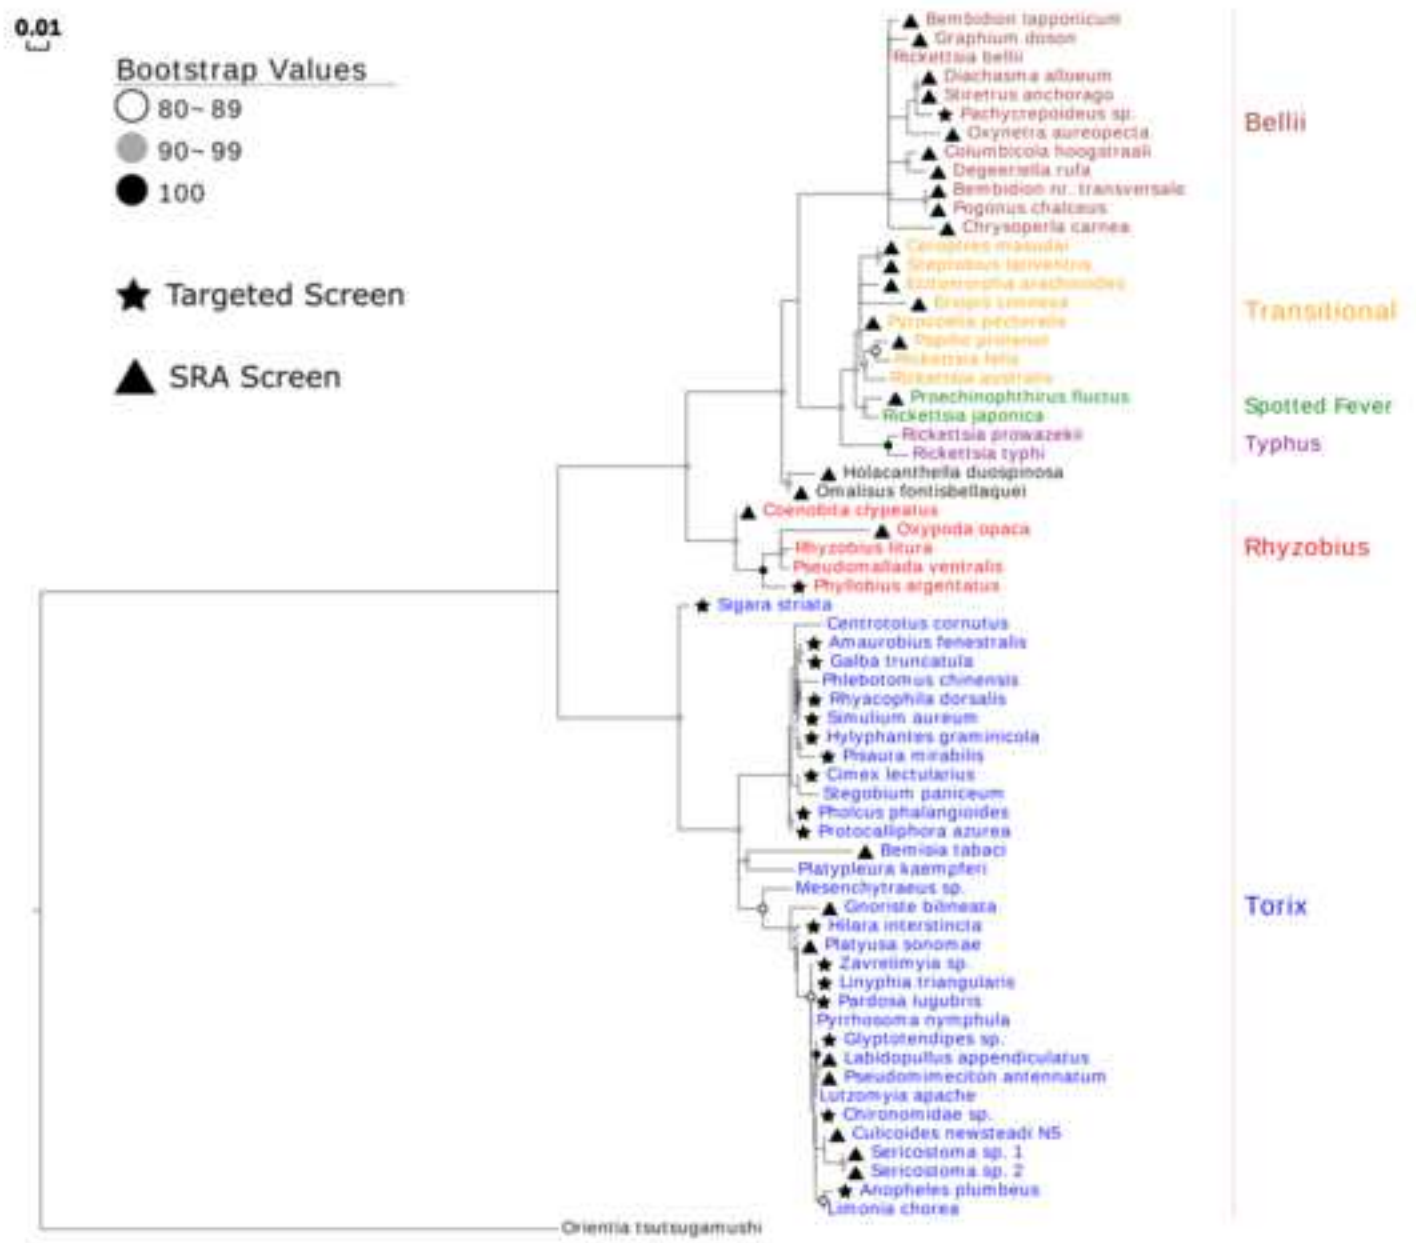



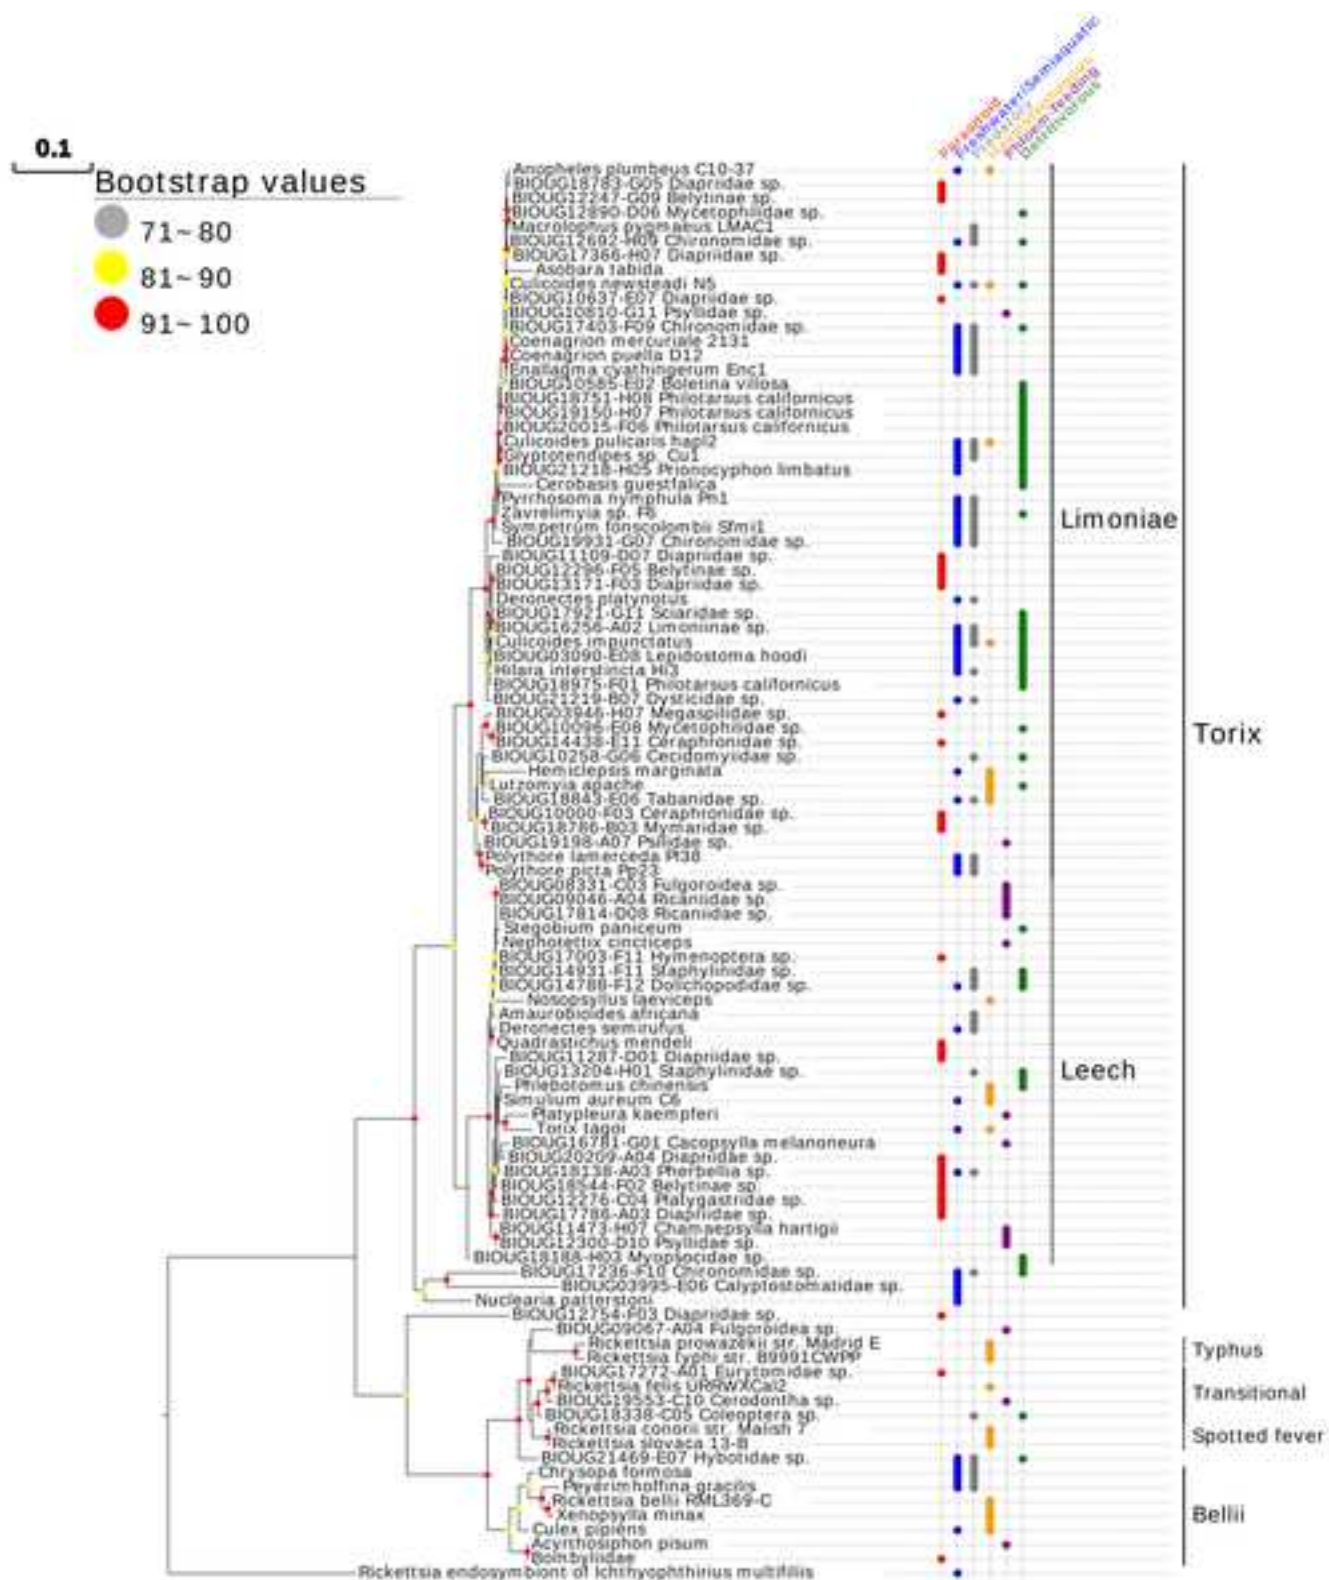

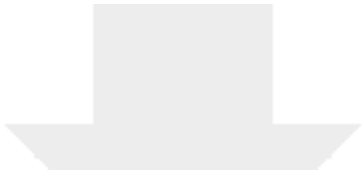

Click here to access/download  
**Supplementary Material**  
Additional file 1.docx





Click here to access/download  
**Supplementary Material**  
Additional file 2.7z



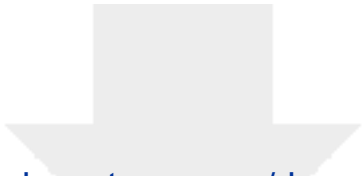

Click here to access/download  
**Supplementary Material**  
Additional file 3.docx



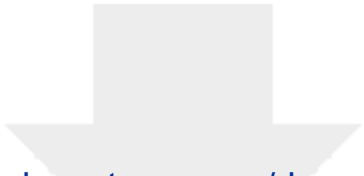

Click here to access/download  
**Supplementary Material**  
Additional file 4.docx





Click here to access/download  
**Supplementary Material**  
Additional file 5.xlsx

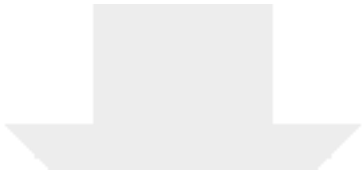

Click here to access/download  
**Supplementary Material**  
Additional file 6.docx





Click here to access/download  
**Supplementary Material**  
Additional file 7.docx





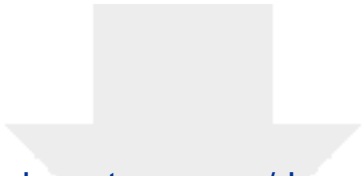

Click here to access/download  
**Supplementary Material**  
Additional file 8.docx



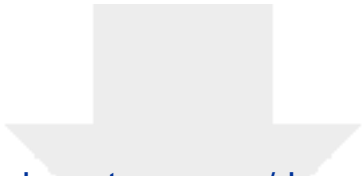

Click here to access/download  
**Supplementary Material**  
Additional file 9.pdf



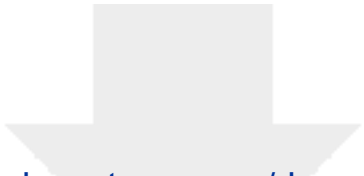

Click here to access/download  
**Supplementary Material**  
Additional file 10.xlsx



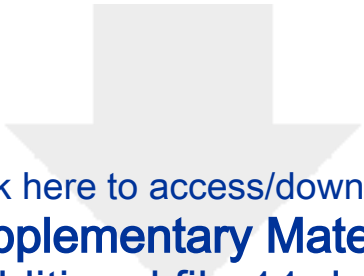

Click here to access/download  
**Supplementary Material**  
Additional file 11.docx



Supplement: giab021_giga-d-20-00244_revision_1.pdf [file giab021_giga-d-20-00244_revision_1.pdf]
